# Supplementary material for: Evaluation of nine condensed-phase force fields of the GROMOS, CHARMM, OPLS, AMBER, and OpenFF families against experimental cross-solvation free energies
Source: Royal Society of Chemistry journal article supplement (doi:10.1039/d1cp00215e), 2021-01-01
Supplement: d1cp00215e1.pdf [file d1cp00215e1.pdf]

Supporting Information for "Evaluation of nine  
condensed-phase force fields of the GROMOS,  
CHARMM, OPLS, AMBER and OpenFF  
families against experimental cross-solvation  
free energies."

Sadra Kashefolgheta,<sup>†</sup> Shuzhe Wang,<sup>†</sup> William E. Acree, Jr,<sup>‡</sup> and Philippe H.  
Hünenberger<sup>\*,†</sup>

<sup>†</sup>*Laboratorium für Physikalische Chemie, ETH Zürich, ETH-Hönggerberg, HCI, CH-8093  
Zürich, Switzerland*

<sup>‡</sup>*Department of Chemistry, University of North Texas, 1155 Union Circle Drive #305070,  
Denton, Texas 76203, United States*

E-mail: phil@igc.phys.chem.ethz.ch

Phone: +41 44 632 55 03

## S.1 Force-field comparison for individual compound pairs

For the five force fields newly considered in this work, the simulation results for all compound pairs are reported in Tab. S.1 in terms of calculated  $\Delta_s G_{A:B}^{\ominus}$  values and associated statistical error bars. The reference experimental values are also given along with standard deviations  $\sigma$  over the available experimental estimates. This data is displayed graphically in Fig. S.1. The electrostatic and van der Waals contributions to the calculated  $\Delta_s G_{A:B}^{\ominus}$  values are reported in Tab. S.2. This data is displayed graphically in Figs. S.2 and S.3. The deviations of the calculated  $\Delta_s G_{A:B}^{\ominus}$  values relative to the experimental data are reported in Tab. S.3. Finally, root-mean-square errors relative to experiment for the transfer free energies  $\Delta_t G_{C:A \rightarrow B}^{\ominus}$  of all solutes C between any pair of solvents A and B considering the FULL set are displayed in Fig. S.4. This figure is the analog of Main Article Fig. 6 for the FULL set. The tables analogous to Tabs. S.1 and S.2 and the figures analogous to in Figs. S.1-S.4 for the four force fields considered in our previous article<sup>161</sup> are not repeated here, and can be found in Suppl. Mat. Sec. S.8 of Ref.<sup>43</sup>.

Table S.1: Numerical values of the experimental and calculated cross-solvation free energies  $\Delta_s G_{A:B}^{\ominus}$ . The experimental values and the associated error estimates ( $\pm$ ), corresponding to the standard deviation  $\sigma$  over available experimental values, are taken from Suppl. Mat. Tab. S.1 in Ref.<sup>43</sup> The calculated values are reported for the five force fields newly considered in this work (Main Article Tab. 1), along with their statistical error estimates ( $\pm$ ) calculated using block averaging. The molecules considered and their acronyms are shown in Main Article Fig. 1. This data is displayed graphically in Fig. S.1.

| Solute (A)              | Solvent (B) | Experimental                 |       | GROMOS-54A7                  |       | GROMOS-ATB                   |       | OPLS-LBCC                    |       | AMBER-GAFF2                  |       | OpenFF                       |       |
|-------------------------|-------------|------------------------------|-------|------------------------------|-------|------------------------------|-------|------------------------------|-------|------------------------------|-------|------------------------------|-------|
|                         |             | $\Delta_s G_{A:B}^{\ominus}$ | $\pm$ |
| [kJ·mol <sup>-1</sup> ] |             |                              |       |                              |       |                              |       |                              |       |                              |       |                              |       |
| DAMD                    | DAMD        | -23.32                       | 5.0   | -                            | -     | -40.13                       | 1.41  | -33.80                       | 0.40  | -28.61                       | 0.25  | -30.37                       | 0.33  |
| DAMD                    | PPN         | -26.09                       | -     | -                            | -     | -38.49                       | 0.77  | -33.33                       | 0.20  | -28.64                       | 0.21  | -30.66                       | 0.19  |
| DAMD                    | BTN         | -24.49                       | -     | -                            | -     | -37.23                       | 0.74  | -32.58                       | 0.21  | -28.24                       | 0.21  | -29.84                       | 0.18  |
| DAMD                    | PYRI        | -23.41                       | -     | -                            | -     | -38.81                       | 1.29  | -34.21                       | 0.51  | -29.62                       | 0.26  | -31.66                       | 0.27  |
| DAMD                    | H2O         | -21.87                       | -     | -                            | -     | -34.78                       | 1.89  | -34.62                       | 0.19  | -24.96                       | 0.20  | -31.62                       | 0.15  |
| DAMD                    | C2CL2       | -26.09                       | 4.22  | -                            | -     | -38.14                       | 0.85  | -36.33                       | 0.41  | -30.25                       | 0.26  | -33.17                       | 0.26  |
| DAMD                    | EAE         | -26.77                       | -     | -                            | -     | -37.67                       | 0.92  | -32.50                       | 0.29  | -27.65                       | 0.21  | -30.50                       | 0.33  |
| DAMD                    | PTL         | -23.41                       | -     | -                            | -     | -36.95                       | 1.80  | -31.85                       | 0.70  | -30.83                       | 0.60  | -35.76                       | 0.43  |
| DAMD                    | MTL         | -22.21                       | -     | -                            | -     | -38.77                       | 0.96  | -34.57                       | 0.32  | -31.34                       | 0.31  | -40.21                       | 0.20  |
| DAMD                    | ETL         | -22.15                       | -     | -                            | -     | -38.41                       | 1.44  | -33.48                       | 0.43  | -32.61                       | 0.35  | -38.16                       | 0.35  |
| DAMD                    | BTL         | -20.44                       | -     | -                            | -     | -36.11                       | 1.99  | -32.05                       | 0.46  | -29.80                       | 0.90  | -37.66                       | 0.49  |
| DAMD                    | 2M2P        | -25.81                       | -     | -                            | -     | -41.78                       | 3.50  | -31.90                       | 0.55  | -31.00                       | 0.64  | -36.32                       | 0.73  |

Table S.1 – Continued on next page

Table S.1 – Continued from previous page

| Solute (A)              | Solvent (B) | Experimental               |       | GROMOS-54A7                |       | GROMOS-ATB                 |       | OPLS-LBCC                  |       | AMBER-GAFF2                |       | OpenFF                     |       |
|-------------------------|-------------|----------------------------|-------|----------------------------|-------|----------------------------|-------|----------------------------|-------|----------------------------|-------|----------------------------|-------|
|                         |             | $\Delta_s G_{A:B}^\ominus$ | $\pm$ |
| [kJ·mol <sup>-1</sup> ] |             |                            |       |                            |       |                            |       |                            |       |                            |       |                            |       |
| DAMD                    | 1PL         | -22.89                     | -     | -                          | -     | -38.30                     | 1.42  | -32.51                     | 0.39  | -31.30                     | 0.79  | -37.72                     | 0.28  |
| DAMD                    | 2PL         | -23.87                     | -     | -                          | -     | -39.63                     | 2.77  | -32.24                     | 0.42  | -30.84                     | 0.55  | -37.26                     | 0.43  |
| DAMD                    | ANLN        | -27.12                     | -     | -                          | -     | -46.01                     | 1.32  | -36.40                     | 0.70  | -34.11                     | 0.86  | -36.26                     | 0.78  |
| DAMD                    | DEE         | -21.58                     | -     | -                          | -     | -34.44                     | 0.64  | -28.35                     | 0.16  | -24.57                     | 0.11  | -25.67                     | 0.26  |
| DAMD                    | CHCL3       | -30.24                     | 3.47  | -                          | -     | -44.31                     | 1.23  | -41.51                     | 0.38  | -34.92                     | 0.31  | -35.78                     | 0.27  |
| DAMD                    | DEAN        | -22.1                      | -     | -                          | -     | -33.20                     | 0.75  | -29.92                     | 0.21  | -29.34                     | 0.23  | -28.39                     | 0.23  |
| DAMD                    | TEAN        | -18.04                     | -     | -                          | -     | -27.80                     | 0.79  | -25.44                     | 0.26  | -21.22                     | 0.26  | -24.31                     | 0.22  |
| DAMD                    | TOL         | -20.61                     | -     | -                          | -     | -32.85                     | 0.88  | -30.14                     | 0.34  | -26.34                     | 0.24  | -26.66                     | 0.23  |
| DAMD                    | BZN         | -22.61                     | -     | -                          | -     | -35.77                     | 0.90  | -30.26                     | 0.25  | -27.93                     | 0.27  | -27.79                     | 0.21  |
| DAMD                    | HPE         | -15.47                     | -     | -                          | -     | -24.79                     | 0.65  | -19.22                     | 0.19  | -18.74                     | 0.18  | -18.23                     | 0.12  |
| DAMD                    | HXE         | -17.41                     | -     | -                          | -     | -24.69                     | 0.59  | -19.29                     | 0.25  | -19.20                     | 0.16  | -18.34                     | 0.11  |
| DAMD                    | CCL4        | -19.69                     | -     | -                          | -     | -27.10                     | 1.21  | -                          | -     | -21.65                     | 0.14  | -21.41                     | 0.25  |
| DAMD                    | CHE         | -17.7                      | -     | -                          | -     | -24.26                     | 0.64  | -20.37                     | 0.20  | -19.61                     | 0.25  | -18.87                     | 0.21  |
| PPN                     | DAMD        | -16.49                     | 0.01  | -                          | -     | -19.13                     | 1.10  | -18.40                     | 0.35  | -16.80                     | 0.22  | -16.97                     | 0.22  |
| PPN                     | PPN         | -17.35                     | 0.02  | -18.67                     | 0.56  | -19.37                     | 0.60  | -19.66                     | 0.15  | -17.46                     | 0.17  | -18.11                     | 0.12  |
| PPN                     | BTN         | -16.7                      | 0.02  | -18.09                     | 0.56  | -19.22                     | 0.65  | -19.08                     | 0.20  | -17.08                     | 0.18  | -17.38                     | 0.14  |
| PPN                     | PYRI        | -16.71                     | 0.02  | -                          | -     | -18.49                     | 0.96  | -19.01                     | 0.34  | -17.26                     | 0.23  | -17.91                     | 0.22  |
| PPN                     | H2O         | -15.95                     | 0.08  | -10.07                     | 1.28  | -14.09                     | 1.33  | -16.25                     | 0.12  | -13.53                     | 0.15  | -14.28                     | 0.12  |
| PPN                     | C2CL2       | -17.67                     | 0.2   | -                          | -     | -19.63                     | 0.77  | -21.04                     | 0.35  | -18.10                     | 0.20  | -18.82                     | 0.17  |
| PPN                     | EAE         | -16.32                     | 0.01  | -18.13                     | 0.93  | -18.55                     | 0.71  | -18.56                     | 0.26  | -16.81                     | 0.20  | -16.87                     | 0.28  |
| PPN                     | PTL         | -13.46                     | 0.54  | -14.28                     | 1.25  | -17.55                     | 1.33  | -17.33                     | 0.28  | -13.94                     | 0.43  | -18.39                     | 0.39  |
| PPN                     | MTL         | -16.5                      | 0.01  | -15.69                     | 0.88  | -18.92                     | 0.71  | -19.18                     | 0.16  | -17.89                     | 0.25  | -21.37                     | 0.18  |
| PPN                     | ETL         | -15.81                     | 0.02  | -15.43                     | 1.01  | -17.75                     | 1.05  | -19.00                     | 0.26  | -17.91                     | 0.30  | -20.26                     | 0.29  |
| PPN                     | BTL         | -14.67                     | 0.0   | -14.57                     | 0.99  | -16.02                     | 1.59  | -18.12                     | 0.34  | -15.61                     | 0.60  | -18.40                     | 0.36  |
| PPN                     | 2M2P        | -13.76                     | -     | -15.44                     | 1.04  | -18.18                     | 2.55  | -18.12                     | 0.37  | -16.36                     | 0.48  | -18.97                     | 0.39  |
| PPN                     | 1PL         | -14.27                     | -     | -15.89                     | 1.14  | -17.37                     | 0.97  | -18.98                     | 0.22  | -16.59                     | 0.38  | -19.13                     | 0.25  |
| PPN                     | 2PL         | -14.45                     | 0.2   | -15.47                     | 1.18  | -17.32                     | 1.94  | -18.25                     | 0.38  | -16.68                     | 0.53  | -19.38                     | 0.36  |
| PPN                     | ANLN        | -17.28                     | 0.04  | -18.92                     | 2.49  | -23.49                     | 0.96  | -20.59                     | 0.61  | -20.06                     | 0.90  | -20.02                     | 0.56  |
| PPN                     | DEE         | -14.44                     | 0.0   | -15.47                     | 0.45  | -17.48                     | 0.49  | -17.27                     | 0.16  | -14.47                     | 0.13  | -14.78                     | 0.16  |
| PPN                     | CHCL3       | -18.53                     | 0.11  | -18.12                     | 0.72  | -21.53                     | 1.01  | -25.48                     | 0.27  | -20.43                     | 0.24  | -20.61                     | 0.22  |
| PPN                     | DEAN        | -13.3                      | -     | -17.69                     | 0.85  | -16.78                     | 0.57  | -17.90                     | 0.16  | -17.10                     | 0.22  | -16.55                     | 0.15  |
| PPN                     | TEAN        | -12.84                     | -     | -15.13                     | 0.57  | -12.36                     | 0.61  | -14.08                     | 0.19  | -11.06                     | 0.19  | -13.50                     | 0.17  |
| PPN                     | TOL         | -14.96                     | 0.1   | -16.67                     | 0.70  | -15.75                     | 0.76  | -17.39                     | 0.18  | -15.03                     | 0.17  | -15.56                     | 0.19  |
| PPN                     | BZN         | -15.88                     | 0.05  | -17.13                     | 0.64  | -17.52                     | 0.75  | -17.65                     | 0.21  | -16.39                     | 0.18  | -16.00                     | 0.20  |
| PPN                     | HPE         | -10.9                      | 0.1   | -12.77                     | 0.46  | -11.04                     | 0.45  | -10.24                     | 0.13  | -9.52                      | 0.11  | -9.51                      | 0.12  |
| PPN                     | HXE         | -10.94                     | 0.12  | -13.11                     | 0.45  | -10.97                     | 0.48  | -10.25                     | 0.14  | -10.18                     | 0.13  | -9.96                      | 0.09  |
| PPN                     | CCL4        | -13.99                     | 0.19  | -13.84                     | 0.80  | -11.15                     | 0.89  | -                          | -     | -11.46                     | 0.18  | -11.51                     | 0.19  |
| PPN                     | CHE         | -11.09                     | 0.19  | -13.50                     | 0.51  | -11.50                     | 0.49  | -10.59                     | 0.20  | -9.65                      | 0.24  | -9.68                      | 0.23  |
| BTN                     | DAMD        | -18.78                     | 0.08  | -                          | -     | -18.63                     | 1.12  | -19.82                     | 0.38  | -20.09                     | 0.25  | -19.05                     | 0.24  |
| BTN                     | PPN         | -19.45                     | 0.07  | -20.95                     | 0.57  | -21.05                     | 0.58  | -21.54                     | 0.19  | -20.38                     | 0.16  | -20.34                     | 0.15  |
| BTN                     | BTN         | -19.04                     | 0.1   | -20.49                     | 0.61  | -20.31                     | 0.68  | -20.99                     | 0.23  | -20.19                     | 0.18  | -19.98                     | 0.18  |
| BTN                     | PYRI        | -19.46                     | 0.1   | -                          | -     | -20.62                     | 1.02  | -20.54                     | 0.29  | -20.57                     | 0.27  | -20.17                     | 0.19  |
| BTN                     | H2O         | -15.06                     | 0.1   | -9.37                      | 1.41  | -11.43                     | 1.59  | -15.54                     | 0.16  | -13.30                     | 0.17  | -13.76                     | 0.15  |
| BTN                     | C2CL2       | -20.78                     | 0.0   | -                          | -     | -21.87                     | 0.82  | -22.70                     | 0.34  | -21.44                     | 0.20  | -21.89                     | 0.18  |
| BTN                     | EAE         | -18.56                     | 0.03  | -20.66                     | 0.85  | -19.71                     | 0.80  | -20.63                     | 0.26  | -19.75                     | 0.20  | -19.69                     | 0.31  |
| BTN                     | PTL         | -16.27                     | 0.0   | -17.47                     | 1.34  | -18.53                     | 1.30  | -19.66                     | 0.37  | -18.20                     | 0.54  | -21.42                     | 0.38  |
| BTN                     | MTL         | -19.02                     | 0.03  | -17.61                     | 0.91  | -19.39                     | 0.74  | -20.64                     | 0.24  | -20.57                     | 0.23  | -23.81                     | 0.21  |
| BTN                     | ETL         | -18.04                     | 0.01  | -17.42                     | 1.11  | -18.93                     | 1.09  | -20.79                     | 0.38  | -20.96                     | 0.36  | -22.55                     | 0.26  |
| BTN                     | BTL         | -17.27                     | 0.03  | -17.53                     | 1.45  | -16.87                     | 1.62  | -20.61                     | 0.27  | -17.77                     | 0.50  | -21.78                     | 0.34  |
| BTN                     | 2M2P        | -17.79                     | 0.02  | -18.40                     | 1.28  | -20.40                     | 3.29  | -20.48                     | 0.36  | -20.29                     | 0.66  | -22.34                     | 0.50  |

Table S.1 – Continued on next page

Table S.1 – Continued from previous page

| Solute (A)              | Solvent (B) | Experimental               |       | GROMOS-54A7                |       | GROMOS-ATB                 |       | OPLS-LBCC                  |       | AMBER-GAFF2                |       | OpenFF                     |       |
|-------------------------|-------------|----------------------------|-------|----------------------------|-------|----------------------------|-------|----------------------------|-------|----------------------------|-------|----------------------------|-------|
|                         |             | $\Delta_s G_{A:B}^\ominus$ | $\pm$ |
| [kJ·mol <sup>-1</sup> ] |             |                            |       |                            |       |                            |       |                            |       |                            |       |                            |       |
| BTN                     | 1PL         | -17.49                     | 0.07  | -17.13                     | 1.35  | -18.71                     | 0.98  | -20.83                     | 0.34  | -19.07                     | 0.57  | -22.60                     | 0.36  |
| BTN                     | 2PL         | -17.13                     | 0.06  | -17.45                     | 1.25  | -16.93                     | 2.08  | -19.90                     | 0.47  | -19.18                     | 0.47  | -22.23                     | 0.32  |
| BTN                     | ANLN        | -20.29                     | 0.05  | -18.42                     | 2.45  | -24.35                     | 1.05  | -22.23                     | 0.38  | -22.09                     | 1.12  | -22.17                     | 0.92  |
| BTN                     | DEE         | -17.3                      | 0.0   | -18.57                     | 0.47  | -18.95                     | 0.62  | -19.47                     | 0.14  | -17.97                     | 0.15  | -17.97                     | 0.21  |
| BTN                     | CHCL3       | -22.61                     | 0.23  | -21.30                     | 0.75  | -23.02                     | 0.90  | -28.14                     | 0.29  | -24.53                     | 0.24  | -23.85                     | 0.25  |
| BTN                     | DEAN        | -17.36                     | -     | -20.03                     | 0.96  | -18.92                     | 0.55  | -20.16                     | 0.24  | -20.40                     | 0.26  | -18.62                     | 0.17  |
| BTN                     | TEAN        | -15.6                      | 0.32  | -17.42                     | 0.63  | -14.55                     | 0.71  | -16.66                     | 0.25  | -14.44                     | 0.17  | -16.55                     | 0.25  |
| BTN                     | TOL         | -17.87                     | 0.05  | -19.32                     | 0.72  | -19.04                     | 0.75  | -19.24                     | 0.29  | -18.51                     | 0.21  | -18.74                     | 0.18  |
| BTN                     | BZN         | -18.66                     | 0.01  | -19.95                     | 0.78  | -19.82                     | 0.88  | -20.03                     | 0.19  | -19.61                     | 0.23  | -19.16                     | 0.18  |
| BTN                     | HPE         | -14.11                     | 0.05  | -15.99                     | 0.49  | -13.51                     | 0.57  | -12.95                     | 0.12  | -13.17                     | 0.17  | -13.06                     | 0.13  |
| BTN                     | HXE         | -14.49                     | 0.12  | -15.63                     | 0.59  | -14.34                     | 0.57  | -13.34                     | 0.13  | -13.68                     | 0.16  | -13.13                     | 0.11  |
| BTN                     | CCL4        | -17.14                     | 0.07  | -16.71                     | 0.92  | -14.57                     | 0.97  | -                          | -     | -15.54                     | 0.19  | -15.21                     | 0.16  |
| BTN                     | CHE         | -14.46                     | 0.19  | -16.44                     | 0.60  | -14.14                     | 0.57  | -13.88                     | 0.30  | -14.02                     | 0.28  | -13.51                     | 0.13  |
| PYRI                    | DAMD        | -24.69                     | 0.6   | -                          | -     | -25.34                     | 1.21  | -28.31                     | 0.38  | -21.72                     | 0.26  | -22.73                     | 0.17  |
| PYRI                    | PPN         | -22.66                     | -     | -                          | -     | -24.62                     | 0.67  | -27.14                     | 0.16  | -21.87                     | 0.11  | -22.39                     | 0.18  |
| PYRI                    | BTN         | -22.52                     | 0.03  | -                          | -     | -24.85                     | 0.74  | -27.11                     | 0.20  | -21.41                     | 0.14  | -22.26                     | 0.17  |
| PYRI                    | PYRI        | -23.03                     | 0.08  | -                          | -     | -25.04                     | 1.15  | -27.37                     | 0.34  | -21.24                     | 0.26  | -22.50                     | 0.28  |
| PYRI                    | H2O         | -19.32                     | 0.26  | -                          | -     | -18.14                     | 1.38  | -19.02                     | 0.18  | -11.92                     | 0.13  | -14.05                     | 0.16  |
| PYRI                    | C2CL2       | -23.27                     | 0.28  | -                          | -     | -24.60                     | 0.77  | -28.48                     | 0.34  | -22.14                     | 0.21  | -22.98                     | 0.16  |
| PYRI                    | EAE         | -28.2                      | -     | -                          | -     | -24.97                     | 0.82  | -26.45                     | 0.30  | -21.17                     | 0.24  | -22.63                     | 0.22  |
| PYRI                    | PTL         | -20.1                      | -     | -                          | -     | -22.88                     | 1.32  | -24.19                     | 0.40  | -18.35                     | 0.49  | -22.56                     | 0.37  |
| PYRI                    | MTL         | -24.33                     | -     | -                          | -     | -22.98                     | 0.80  | -25.15                     | 0.23  | -19.31                     | 0.20  | -23.85                     | 0.21  |
| PYRI                    | ETL         | -23.31                     | 0.53  | -                          | -     | -22.62                     | 1.09  | -25.55                     | 0.27  | -19.93                     | 0.22  | -23.12                     | 0.26  |
| PYRI                    | BTL         | -22.55                     | 0.0   | -                          | -     | -22.19                     | 1.38  | -24.26                     | 0.35  | -18.35                     | 0.43  | -22.08                     | 0.35  |
| PYRI                    | 2M2P        | -21.66                     | 0.95  | -                          | -     | -23.61                     | 2.81  | -25.47                     | 0.34  | -19.39                     | 0.59  | -22.38                     | 0.45  |
| PYRI                    | 1PL         | -22.78                     | 0.01  | -                          | -     | -22.86                     | 1.04  | -25.40                     | 0.31  | -19.11                     | 0.34  | -22.85                     | 0.28  |
| PYRI                    | 2PL         | -22.04                     | 0.0   | -                          | -     | -23.85                     | 1.90  | -25.22                     | 0.35  | -17.96                     | 0.36  | -23.21                     | 0.36  |
| PYRI                    | ANLN        | -39.45                     | -     | -                          | -     | -23.97                     | 1.08  | -28.65                     | 0.51  | -22.27                     | 1.35  | -23.09                     | 0.56  |
| PYRI                    | DEE         | -30.6                      | -     | -                          | -     | -24.26                     | 0.60  | -24.52                     | 0.17  | -19.01                     | 0.17  | -20.61                     | 0.19  |
| PYRI                    | CHCL3       | -26.99                     | 0.02  | -                          | -     | -27.36                     | 1.00  | -31.43                     | 0.30  | -23.71                     | 0.26  | -24.74                     | 0.19  |
| PYRI                    | DEAN        | -19.41                     | -     | -                          | -     | -23.01                     | 0.60  | -25.00                     | 0.22  | -20.75                     | 0.17  | -21.77                     | 0.21  |
| PYRI                    | TEAN        | -20.61                     | -     | -                          | -     | -21.51                     | 0.65  | -22.65                     | 0.23  | -16.87                     | 0.16  | -19.70                     | 0.28  |
| PYRI                    | TOL         | -21.42                     | 0.06  | -                          | -     | -23.61                     | 0.72  | -25.50                     | 0.24  | -19.59                     | 0.17  | -20.60                     | 0.18  |
| PYRI                    | BZN         | -22.08                     | 0.03  | -                          | -     | -25.04                     | 0.81  | -25.72                     | 0.28  | -21.41                     | 0.22  | -21.33                     | 0.21  |
| PYRI                    | HPE         | -17.92                     | 0.01  | -                          | -     | -20.10                     | 0.66  | -18.24                     | 0.14  | -15.36                     | 0.21  | -16.19                     | 0.16  |
| PYRI                    | HXE         | -16.28                     | 0.63  | -                          | -     | -19.65                     | 0.52  | -18.31                     | 0.14  | -15.54                     | 0.11  | -16.14                     | 0.08  |
| PYRI                    | CCL4        | -21.08                     | 0.24  | -                          | -     | -21.47                     | 0.92  | -                          | -     | -17.11                     | 0.25  | -18.13                     | 0.22  |
| PYRI                    | CHE         | -17.95                     | 0.04  | -                          | -     | -19.41                     | 0.62  | -19.48                     | 0.19  | -15.65                     | 0.19  | -16.90                     | 0.22  |
| H2O                     | DAMD        | -24.66                     | -     | -                          | -     | -19.45                     | 0.66  | -18.68                     | 0.20  | -20.18                     | 0.18  | -23.19                     | 0.12  |
| H2O                     | PPN         | -14.79                     | -     | -12.29                     | 0.41  | -15.33                     | 0.35  | -17.19                     | 0.09  | -16.95                     | 0.09  | -17.40                     | 0.09  |
| H2O                     | BTN         | -10.85                     | -     | -11.09                     | 0.42  | -13.61                     | 0.41  | -16.13                     | 0.11  | -15.51                     | 0.13  | -16.44                     | 0.16  |
| H2O                     | PYRI        | -17.45                     | -     | -                          | -     | -15.25                     | 0.52  | -13.31                     | 0.19  | -12.54                     | 0.12  | -14.43                     | 0.12  |
| H2O                     | H2O         | -26.45                     | 0.04  | -26.48                     | 0.82  | -26.33                     | 0.85  | -26.25                     | -     | -26.40                     | -     | -26.40                     | -     |
| H2O                     | C2CL2       | -10.28                     | -     | -                          | -     | -7.70                      | 0.33  | -11.07                     | 0.12  | -6.98                      | 0.08  | -6.32                      | 0.08  |
| H2O                     | EAE         | -16.27                     | 1.54  | -14.81                     | 0.52  | -13.69                     | 0.47  | -14.67                     | 0.15  | -17.54                     | 0.13  | -16.23                     | 0.17  |
| H2O                     | PTL         | -19.01                     | -     | -16.88                     | 1.81  | -16.16                     | 1.15  | -17.45                     | 0.42  | -16.66                     | 0.80  | -14.78                     | 0.34  |
| H2O                     | MTL         | -23.22                     | 0.02  | -22.85                     | 0.90  | -21.33                     | 0.58  | -23.52                     | 0.11  | -22.17                     | 0.17  | -20.33                     | 0.12  |
| H2O                     | ETL         | -21.23                     | 0.01  | -18.74                     | 1.07  | -19.14                     | 0.91  | -22.00                     | 0.23  | -19.46                     | 0.30  | -18.13                     | 0.19  |
| H2O                     | BTL         | -16.38                     | -     | -18.19                     | 1.27  | -17.59                     | 1.83  | -19.07                     | 0.25  | -17.05                     | 0.54  | -15.72                     | 0.38  |
| H2O                     | 2M2P        | -34.82                     | -     | -17.46                     | 1.14  | -17.08                     | 2.29  | -20.04                     | 0.39  | -16.77                     | 0.66  | -15.50                     | 0.43  |

Table S.1 – Continued on next page



Table S.1 – Continued from previous page

| Solute (A)              | Solvent (B) | Experimental               |       | GROMOS-54A7                |       | GROMOS-ATB                 |       | OPLS-LBCC                  |       | AMBER-GAFF2                |       | OpenFF                     |       |
|-------------------------|-------------|----------------------------|-------|----------------------------|-------|----------------------------|-------|----------------------------|-------|----------------------------|-------|----------------------------|-------|
|                         |             | $\Delta_s G_{A:B}^\ominus$ | $\pm$ |
| [kJ·mol <sup>-1</sup> ] |             |                            |       |                            |       |                            |       |                            |       |                            |       |                            |       |
| H2O                     | 1PL         | -24.43                     | -     | -18.51                     | 1.49  | -18.42                     | 0.77  | -20.56                     | 0.24  | -18.96                     | 0.43  | -16.85                     | 0.27  |
| H2O                     | 2PL         | -18.58                     | -     | -17.41                     | 1.37  | -16.69                     | 1.71  | -19.93                     | 0.27  | -17.93                     | 0.44  | -16.35                     | 0.30  |
| H2O                     | ANLN        | -14.1                      | -     | -17.58                     | 2.15  | -17.73                     | 0.59  | -16.52                     | 0.35  | -16.89                     | 0.99  | -14.45                     | 0.44  |
| H2O                     | DEE         | -4.28                      | -     | -1.92                      | 0.28  | -7.24                      | 0.35  | -13.42                     | 0.11  | -5.29                      | 0.10  | -7.52                      | 0.12  |
| H2O                     | CHCL3       | -8.61                      | 0.09  | -0.81                      | 0.33  | -5.32                      | 0.43  | -9.28                      | 0.11  | -5.74                      | 0.12  | -4.55                      | 0.08  |
| H2O                     | DEAN        | -19.3                      | -     | -14.08                     | 0.74  | -5.75                      | 0.36  | -18.44                     | 0.18  | -11.68                     | 0.16  | -16.05                     | 0.20  |
| H2O                     | TEAN        | -12.33                     | -     | -1.47                      | 0.44  | 1.78                       | 0.34  | -10.69                     | 0.16  | 1.26                       | 0.11  | -10.99                     | 0.19  |
| H2O                     | TOL         | -7.08                      | 0.0   | -4.02                      | 0.38  | -3.46                      | 0.37  | -6.82                      | 0.11  | -4.33                      | 0.11  | -5.73                      | 0.10  |
| H2O                     | BZN         | -7.13                      | 0.01  | -7.20                      | 0.41  | -5.13                      | 0.41  | -6.83                      | 0.11  | -8.09                      | 0.11  | -6.69                      | 0.12  |
| H2O                     | HPE         | -1.43                      | 1.03  | 3.06                       | 0.23  | 3.00                       | 0.22  | 2.57                       | 0.05  | 3.88                       | 0.08  | 3.46                       | 0.10  |
| H2O                     | HXE         | -5.45                      | 2.37  | 2.84                       | 0.20  | 2.70                       | 0.23  | 2.35                       | 0.04  | 3.59                       | 0.04  | 3.15                       | 0.06  |
| H2O                     | CCL4        | -3.56                      | 0.05  | 3.73                       | 0.27  | 3.50                       | 0.38  | -                          | -     | 3.35                       | 0.11  | 3.81                       | 0.06  |
| H2O                     | CHE         | -1.66                      | 0.02  | 3.37                       | 0.25  | 2.51                       | 0.21  | 3.11                       | 0.08  | 4.63                       | 0.09  | 4.16                       | 0.10  |
| C2CL2                   | DAMD        | -21.08                     | 0.07  | -                          | -     | -17.10                     | 1.30  | -26.19                     | 0.55  | -19.02                     | 0.20  | -19.04                     | 0.31  |
| C2CL2                   | PPN         | -19.53                     | -     | -                          | -     | -18.37                     | 0.64  | -26.63                     | 0.31  | -19.00                     | 0.18  | -18.74                     | 0.16  |
| C2CL2                   | BTN         | -20.12                     | 0.04  | -                          | -     | -18.26                     | 0.69  | -26.17                     | 0.30  | -18.89                     | 0.15  | -18.87                     | 0.15  |
| C2CL2                   | PYRI        | -16.84                     | -     | -                          | -     | -17.47                     | 0.92  | -25.26                     | 0.54  | -18.23                     | 0.26  | -18.05                     | 0.16  |
| C2CL2                   | H2O         | -7.53                      | 0.02  | -                          | -     | -3.46                      | 1.51  | -13.07                     | 0.29  | -2.82                      | 0.17  | -2.40                      | 0.16  |
| C2CL2                   | C2CL2       | -19.87                     | -     | -                          | -     | -17.75                     | 0.81  | -24.43                     | 0.57  | -17.60                     | 0.16  | -17.69                     | 0.21  |
| C2CL2                   | EAE         | -19.83                     | 0.04  | -                          | -     | -17.49                     | 0.75  | -24.29                     | 0.41  | -18.90                     | 0.26  | -18.04                     | 0.29  |
| C2CL2                   | PTL         | -16.33                     | -     | -                          | -     | -14.67                     | 1.10  | -23.20                     | 0.58  | -15.43                     | 0.39  | -15.64                     | 0.38  |
| C2CL2                   | MTL         | -18.67                     | -     | -                          | -     | -15.41                     | 0.67  | -23.61                     | 0.37  | -14.52                     | 0.17  | -16.76                     | 0.13  |
| C2CL2                   | ETL         | -17.64                     | -     | -                          | -     | -14.54                     | 0.83  | -24.41                     | 0.40  | -15.18                     | 0.24  | -16.67                     | 0.24  |
| C2CL2                   | BTL         | -16.67                     | 0.0   | -                          | -     | -14.44                     | 1.14  | -24.01                     | 0.54  | -15.22                     | 0.29  | -15.78                     | 0.29  |
| C2CL2                   | 2M2P        | -12.5                      | -     | -                          | -     | -15.13                     | 2.03  | -25.48                     | 0.53  | -14.93                     | 0.61  | -15.91                     | 0.39  |
| C2CL2                   | 1PL         | -16.79                     | -     | -                          | -     | -15.28                     | 0.82  | -25.20                     | 0.35  | -15.42                     | 0.27  | -16.39                     | 0.21  |
| C2CL2                   | 2PL         | -17.7                      | -     | -                          | -     | -14.81                     | 1.24  | -24.87                     | 0.40  | -14.98                     | 0.28  | -15.42                     | 0.24  |
| C2CL2                   | ANLN        | -17.36                     | -     | -                          | -     | -17.43                     | 1.05  | -24.02                     | 0.50  | -17.66                     | 0.93  | -17.05                     | 0.68  |
| C2CL2                   | DEE         | -18.61                     | 0.0   | -                          | -     | -16.79                     | 0.59  | -23.50                     | 0.21  | -17.23                     | 0.17  | -18.04                     | 0.17  |
| C2CL2                   | CHCL3       | -18.64                     | 1.0   | -                          | -     | -18.03                     | 0.97  | -25.43                     | 0.44  | -17.60                     | 0.21  | -17.72                     | 0.26  |
| C2CL2                   | DEAN        | -19.18                     | -     | -                          | -     | -15.77                     | 0.60  | -25.22                     | 0.29  | -17.34                     | 0.24  | -18.80                     | 0.19  |
| C2CL2                   | TEAN        | -13.13                     | -     | -                          | -     | -14.30                     | 0.74  | -20.71                     | 0.37  | -15.13                     | 0.19  | -17.61                     | 0.29  |
| C2CL2                   | TOL         | -18.33                     | -     | -                          | -     | -16.55                     | 0.76  | -22.96                     | 0.39  | -18.34                     | 0.23  | -17.67                     | 0.23  |
| C2CL2                   | BZN         | -19.41                     | 0.0   | -                          | -     | -17.89                     | 0.88  | -22.83                     | 0.27  | -19.23                     | 0.22  | -18.18                     | 0.20  |
| C2CL2                   | HPE         | -16.98                     | 1.51  | -                          | -     | -13.68                     | 0.71  | -14.48                     | 0.15  | -14.17                     | 0.13  | -13.60                     | 0.16  |
| C2CL2                   | HXE         | -15.47                     | 0.16  | -                          | -     | -13.75                     | 0.59  | -14.45                     | 0.13  | -14.48                     | 0.18  | -13.95                     | 0.13  |
| C2CL2                   | CCL4        | -19.52                     | 1.54  | -                          | -     | -13.97                     | 1.05  | -                          | -     | -14.68                     | 0.17  | -14.61                     | 0.26  |
| C2CL2                   | CHE         | -16.04                     | 0.0   | -                          | -     | -13.50                     | 0.70  | -14.77                     | 0.15  | -14.46                     | 0.31  | -14.61                     | 0.16  |
| EAE                     | DAMD        | -17.4                      | 0.01  | -                          | -     | -22.94                     | 1.35  | -21.91                     | 0.47  | -20.66                     | 0.28  | -23.14                     | 0.26  |
| EAE                     | PPN         | -19.75                     | -     | -29.22                     | 0.65  | -23.06                     | 0.71  | -23.21                     | 0.21  | -21.29                     | 0.16  | -23.56                     | 0.22  |
| EAE                     | BTN         | -18.82                     | 0.02  | -28.34                     | 0.72  | -22.95                     | 0.68  | -22.42                     | 0.17  | -21.03                     | 0.21  | -22.90                     | 0.25  |
| EAE                     | PYRI        | -20.33                     | -     | -                          | -     | -23.88                     | 1.06  | -21.97                     | 0.33  | -21.43                     | 0.26  | -24.27                     | 0.22  |
| EAE                     | H2O         | -12.79                     | 0.25  | -18.48                     | 1.56  | -12.57                     | 1.63  | -14.08                     | 0.16  | -14.94                     | 0.17  | -16.07                     | 0.17  |
| EAE                     | C2CL2       | -20.57                     | 0.43  | -                          | -     | -24.80                     | 0.74  | -23.34                     | 0.34  | -23.01                     | 0.21  | -25.07                     | 0.24  |
| EAE                     | EAE         | -18.8                      | 0.06  | -28.75                     | 1.09  | -23.24                     | 0.97  | -22.60                     | 0.20  | -20.85                     | 0.24  | -23.54                     | 0.23  |
| EAE                     | PTL         | -16.21                     | 0.0   | -27.87                     | 2.23  | -21.36                     | 1.44  | -21.49                     | 0.29  | -20.65                     | 0.77  | -24.79                     | 0.52  |
| EAE                     | MTL         | -17.64                     | -     | -27.43                     | 1.21  | -22.08                     | 0.94  | -21.61                     | 0.25  | -22.26                     | 0.27  | -26.99                     | 0.22  |
| EAE                     | ETL         | -17.17                     | 0.19  | -25.69                     | 1.73  | -21.87                     | 1.19  | -21.62                     | 0.28  | -22.85                     | 0.38  | -25.98                     | 0.27  |
| EAE                     | BTL         | -16.61                     | 0.0   | -26.01                     | 1.95  | -22.11                     | 1.70  | -21.52                     | 0.42  | -21.32                     | 0.59  | -25.43                     | 0.39  |
| EAE                     | 2M2P        | -20.55                     | -     | -25.50                     | 1.37  | -22.04                     | 2.34  | -22.22                     | 0.40  | -22.96                     | 0.94  | -25.10                     | 0.41  |

Table S.1 – Continued on next page

Table S.1 – Continued from previous page

| Solute (A)              | Solvent (B) | Experimental               |       | GROMOS-54A7                |       | GROMOS-ATB                 |       | OPLS-LBCC                  |       | AMBER-GAFF2                |       | OpenFF                     |       |
|-------------------------|-------------|----------------------------|-------|----------------------------|-------|----------------------------|-------|----------------------------|-------|----------------------------|-------|----------------------------|-------|
|                         |             | $\Delta_s G_{A:B}^\ominus$ | $\pm$ |
| [kJ·mol <sup>-1</sup> ] |             |                            |       |                            |       |                            |       |                            |       |                            |       |                            |       |
| EAE                     | 1PL         | -17.24                     | -     | -25.00                     | 2.00  | -22.98                     | 1.00  | -22.25                     | 0.29  | -21.33                     | 0.53  | -25.63                     | 0.33  |
| EAE                     | 2PL         | -16.73                     | 0.2   | -28.02                     | 1.49  | -21.36                     | 2.06  | -21.53                     | 0.37  | -22.00                     | 0.66  | -25.71                     | 0.33  |
| EAE                     | ANLN        | -18.29                     | 0.29  | -30.57                     | 3.36  | -28.49                     | 1.14  | -24.58                     | 0.48  | -23.64                     | 0.73  | -26.54                     | 0.78  |
| EAE                     | DEE         | -17.41                     | -     | -24.72                     | 0.56  | -22.95                     | 0.56  | -21.45                     | 0.20  | -19.23                     | 0.13  | -21.79                     | 0.17  |
| EAE                     | CHCL3       | -23.23                     | 0.23  | -27.96                     | 0.86  | -27.76                     | 1.05  | -28.16                     | 0.31  | -26.49                     | 0.31  | -27.81                     | 0.26  |
| EAE                     | DEAN        | -16.33                     | -     | -28.46                     | 1.23  | -22.91                     | 0.66  | -22.32                     | 0.19  | -22.47                     | 0.27  | -23.14                     | 0.20  |
| EAE                     | TEAN        | -20.89                     | -     | -23.33                     | 0.75  | -19.78                     | 0.72  | -19.41                     | 0.23  | -16.94                     | 0.18  | -20.71                     | 0.26  |
| EAE                     | TOL         | -18.37                     | 0.14  | -26.53                     | 0.85  | -22.88                     | 0.78  | -22.64                     | 0.25  | -20.12                     | 0.20  | -22.82                     | 0.19  |
| EAE                     | BZN         | -18.91                     | 0.06  | -27.59                     | 0.87  | -23.38                     | 0.99  | -22.99                     | 0.23  | -21.52                     | 0.21  | -23.56                     | 0.15  |
| EAE                     | HPE         | -14.68                     | 0.05  | -20.33                     | 0.69  | -17.83                     | 0.66  | -15.96                     | 0.15  | -15.44                     | 0.17  | -17.52                     | 0.22  |
| EAE                     | HXE         | -15.15                     | 0.04  | -19.81                     | 0.52  | -18.29                     | 0.61  | -16.16                     | 0.16  | -15.63                     | 0.13  | -17.43                     | 0.15  |
| EAE                     | CCL4        | -18.29                     | 0.27  | -21.73                     | 0.74  | -19.97                     | 1.24  | -                          | -     | -18.03                     | 0.19  | -19.96                     | 0.21  |
| EAE                     | CHE         | -14.79                     | 0.23  | -21.04                     | 0.66  | -18.69                     | 0.64  | -17.26                     | 0.29  | -15.99                     | 0.37  | -17.82                     | 0.23  |
| PTL                     | DAMD        | -27.86                     | -     | -                          | -     | -24.07                     | 1.41  | -23.44                     | 0.58  | -31.41                     | 0.33  | -29.85                     | 0.26  |
| PTL                     | PPN         | -25.06                     | -     | -29.06                     | 0.79  | -23.80                     | 0.78  | -24.46                     | 0.18  | -28.87                     | 0.19  | -27.39                     | 0.17  |
| PTL                     | BTN         | -23.46                     | -     | -28.57                     | 0.89  | -23.50                     | 0.85  | -24.21                     | 0.26  | -28.39                     | 0.26  | -27.32                     | 0.19  |
| PTL                     | PYRI        | -26.83                     | -     | -                          | -     | -24.43                     | 1.19  | -22.80                     | 0.49  | -26.72                     | 0.30  | -26.85                     | 0.26  |
| PTL                     | H2O         | -18.76                     | 0.18  | -21.59                     | 1.68  | -12.47                     | 1.63  | -18.25                     | 0.18  | -18.89                     | 0.21  | -11.98                     | 0.19  |
| PTL                     | C2CL2       | -24.12                     | 0.88  | -                          | -     | -22.13                     | 0.86  | -23.29                     | 0.36  | -24.24                     | 0.25  | -23.54                     | 0.20  |
| PTL                     | EAE         | -22.64                     | 3.0   | -30.25                     | 1.06  | -23.71                     | 1.03  | -23.57                     | 0.35  | -29.99                     | 0.34  | -26.83                     | 0.25  |
| PTL                     | PTL         | -29.48                     | 2.11  | -31.04                     | 2.93  | -25.70                     | 1.65  | -24.12                     | 0.62  | -28.96                     | 0.63  | -25.28                     | 0.45  |
| PTL                     | MTL         | -28.14                     | 0.01  | -34.27                     | 1.63  | -25.47                     | 0.98  | -25.43                     | 0.26  | -30.30                     | 0.31  | -26.97                     | 0.24  |
| PTL                     | ETL         | -28.32                     | -     | -34.45                     | 2.13  | -25.63                     | 1.42  | -25.65                     | 0.30  | -30.64                     | 0.45  | -26.66                     | 0.30  |
| PTL                     | BTL         | -28.32                     | 0.0   | -34.40                     | 2.03  | -26.30                     | 2.13  | -24.91                     | 0.48  | -30.45                     | 0.73  | -26.40                     | 0.51  |
| PTL                     | 2M2P        | -29.12                     | 0.0   | -31.99                     | 1.53  | -30.65                     | 3.11  | -25.41                     | 0.64  | -30.11                     | 0.90  | -26.33                     | 0.57  |
| PTL                     | 1PL         | -28.37                     | 0.02  | -33.48                     | 1.94  | -25.62                     | 1.32  | -25.46                     | 0.43  | -30.85                     | 0.66  | -26.37                     | 0.24  |
| PTL                     | 2PL         | -28.6                      | 0.0   | -34.25                     | 1.84  | -26.31                     | 2.46  | -25.86                     | 0.55  | -29.70                     | 0.54  | -26.67                     | 0.35  |
| PTL                     | ANLN        | -28.32                     | -     | -30.18                     | 3.88  | -25.29                     | 1.11  | -24.63                     | 0.45  | -27.12                     | 1.38  | -23.17                     | 0.71  |
| PTL                     | DEE         | -25.52                     | -     | -22.55                     | 0.70  | -22.20                     | 0.68  | -22.34                     | 0.17  | -22.64                     | 0.21  | -24.18                     | 0.18  |
| PTL                     | CHCL3       | -24.77                     | 0.16  | -23.33                     | 0.98  | -24.00                     | 1.03  | -28.24                     | 0.26  | -26.36                     | 0.29  | -24.90                     | 0.20  |
| PTL                     | DEAN        | -23.87                     | -     | -31.27                     | 1.32  | -21.22                     | 0.78  | -24.94                     | 0.36  | -27.26                     | 0.31  | -29.47                     | 0.27  |
| PTL                     | TEAN        | -23.18                     | -     | -22.41                     | 0.92  | -17.90                     | 0.85  | -20.92                     | 0.27  | -18.56                     | 0.21  | -26.88                     | 0.38  |
| PTL                     | TOL         | -21.69                     | 0.16  | -24.19                     | 0.84  | -21.35                     | 0.88  | -21.62                     | 0.20  | -22.79                     | 0.22  | -23.27                     | 0.20  |
| PTL                     | BZN         | -21.34                     | 0.01  | -26.03                     | 0.89  | -22.74                     | 1.06  | -21.85                     | 0.26  | -24.84                     | 0.24  | -23.66                     | 0.24  |
| PTL                     | HPE         | -17.4                      | 0.64  | -18.05                     | 0.73  | -16.83                     | 0.67  | -15.87                     | 0.14  | -16.68                     | 0.32  | -18.09                     | 0.21  |
| PTL                     | HXE         | -18.48                     | 0.38  | -18.56                     | 0.59  | -17.13                     | 0.68  | -16.22                     | 0.14  | -17.24                     | 0.17  | -18.38                     | 0.16  |
| PTL                     | CCL4        | -20.12                     | 0.64  | -19.84                     | 0.89  | -17.65                     | 1.32  | -                          | -     | -19.51                     | 0.20  | -21.28                     | 0.24  |
| PTL                     | CHE         | -15.53                     | 0.94  | -19.73                     | 0.83  | -17.08                     | 0.62  | -16.49                     | 0.23  | -16.30                     | 0.29  | -18.70                     | 0.31  |
| MTL                     | DAMD        | -20.43                     | 0.01  | -                          | -     | -15.05                     | 0.76  | -15.40                     | 0.21  | -17.39                     | 0.15  | -18.56                     | 0.13  |
| MTL                     | PPN         | -17.29                     | 0.01  | -17.43                     | 0.43  | -13.38                     | 0.43  | -15.10                     | 0.11  | -15.49                     | 0.13  | -15.38                     | 0.11  |
| MTL                     | BTN         | -16.03                     | 0.01  | -16.54                     | 0.48  | -12.73                     | 0.54  | -14.26                     | 0.12  | -14.74                     | 0.11  | -14.96                     | 0.09  |
| MTL                     | PYRI        | -18.74                     | 0.29  | -                          | -     | -12.49                     | 0.65  | -13.07                     | 0.18  | -12.15                     | 0.17  | -13.56                     | 0.15  |
| MTL                     | H2O         | -21.31                     | 0.04  | -22.59                     | 1.06  | -14.90                     | 0.97  | -19.67                     | 0.11  | -17.36                     | 0.09  | -12.92                     | 0.11  |
| MTL                     | C2CL2       | -10.95                     | 0.69  | -                          | -     | -10.16                     | 0.44  | -13.34                     | 0.19  | -8.95                      | 0.13  | -9.66                      | 0.11  |
| MTL                     | EAE         | -15.22                     | 0.5   | -19.28                     | 0.67  | -12.55                     | 0.58  | -13.40                     | 0.19  | -16.09                     | 0.15  | -14.67                     | 0.14  |
| MTL                     | PTL         | -17.53                     | 0.0   | -23.12                     | 1.36  | -13.66                     | 1.21  | -14.75                     | 0.42  | -14.85                     | 0.50  | -12.04                     | 0.31  |
| MTL                     | MTL         | -20.54                     | 0.02  | -26.09                     | 1.23  | -16.65                     | 0.62  | -18.39                     | 0.16  | -18.00                     | 0.20  | -15.36                     | 0.12  |
| MTL                     | ETL         | -19.4                      | 0.02  | -24.90                     | 1.26  | -15.23                     | 0.92  | -17.50                     | 0.23  | -16.99                     | 0.28  | -14.36                     | 0.20  |
| MTL                     | BTL         | -17.88                     | 1.1   | -24.71                     | 1.37  | -13.98                     | 1.36  | -15.83                     | 0.32  | -15.68                     | 0.53  | -13.25                     | 0.23  |
| MTL                     | 2M2P        | -19.36                     | 0.0   | -22.18                     | 1.25  | -16.40                     | 2.86  | -15.94                     | 0.41  | -15.23                     | 0.68  | -13.69                     | 0.37  |

Table S.1 – Continued on next page

Table S.1 – Continued from previous page

| Solute (A)              | Solvent (B) | Experimental               |       | GROMOS-54A7                |       | GROMOS-ATB                 |       | OPLS-LBCC                  |       | AMBER-GAFF2                |       | OpenFF                     |       |
|-------------------------|-------------|----------------------------|-------|----------------------------|-------|----------------------------|-------|----------------------------|-------|----------------------------|-------|----------------------------|-------|
|                         |             | $\Delta_s G_{A:B}^\ominus$ | $\pm$ |
| [kJ·mol <sup>-1</sup> ] |             |                            |       |                            |       |                            |       |                            |       |                            |       |                            |       |
| MTL                     | 1PL         | -17.97                     | 0.01  | -23.05                     | 1.44  | -15.11                     | 0.84  | -16.52                     | 0.24  | -17.13                     | 0.48  | -13.70                     | 0.20  |
| MTL                     | 2PL         | -19.12                     | 0.2   | -24.77                     | 1.17  | -14.84                     | 2.00  | -16.30                     | 0.33  | -16.87                     | 0.44  | -13.99                     | 0.23  |
| MTL                     | ANLN        | -16.15                     | 0.01  | -25.27                     | 2.36  | -14.35                     | 0.69  | -16.00                     | 0.42  | -16.45                     | 0.54  | -13.69                     | 0.42  |
| MTL                     | DEE         | -14.16                     | 0.0   | -8.99                      | 0.39  | -9.59                      | 0.39  | -12.22                     | 0.14  | -7.76                      | 0.11  | -10.72                     | 0.13  |
| MTL                     | CHCL3       | -13.95                     | 0.16  | -9.30                      | 0.50  | -10.11                     | 0.62  | -15.40                     | 0.13  | -9.11                      | 0.13  | -9.75                      | 0.16  |
| MTL                     | DEAN        | -14.5                      | -     | -22.20                     | 0.94  | -8.04                      | 0.38  | -14.99                     | 0.15  | -13.01                     | 0.21  | -16.66                     | 0.18  |
| MTL                     | TEAN        | -14.84                     | -     | -9.27                      | 0.55  | -3.57                      | 0.42  | -9.76                      | 0.18  | -2.71                      | 0.15  | -13.58                     | 0.19  |
| MTL                     | TOL         | -9.29                      | 0.38  | -11.51                     | 0.53  | -7.63                      | 0.45  | -9.90                      | 0.15  | -7.20                      | 0.10  | -9.47                      | 0.10  |
| MTL                     | BZN         | -10.78                     | 0.02  | -13.53                     | 0.53  | -8.90                      | 0.54  | -10.10                     | 0.13  | -9.76                      | 0.16  | -10.10                     | 0.16  |
| MTL                     | HPE         | -5.65                      | 0.54  | -4.55                      | 0.35  | -2.96                      | 0.38  | -3.40                      | 0.08  | -0.94                      | 0.09  | -3.85                      | 0.10  |
| MTL                     | HXE         | -6.28                      | 0.12  | -4.87                      | 0.30  | -3.17                      | 0.31  | -3.58                      | 0.09  | -1.23                      | 0.09  | -4.12                      | 0.06  |
| MTL                     | CCL4        | -9.27                      | 0.32  | -5.06                      | 0.49  | -3.42                      | 0.48  | -                          | -     | -2.02                      | 0.09  | -4.62                      | 0.15  |
| MTL                     | CHE         | -5.7                       | 0.64  | -5.05                      | 0.39  | -3.03                      | 0.33  | -3.22                      | 0.11  | -0.36                      | 0.10  | -3.81                      | 0.09  |
| ETL                     | DAMD        | -21.89                     | 0.33  | -                          | -     | -17.41                     | 0.94  | -17.77                     | 0.26  | -20.00                     | 0.22  | -21.50                     | 0.16  |
| ETL                     | PPN         | -18.46                     | 0.04  | -19.89                     | 0.55  | -16.75                     | 0.60  | -17.67                     | 0.13  | -18.31                     | 0.16  | -18.35                     | 0.14  |
| ETL                     | BTN         | -18.18                     | 0.21  | -18.88                     | 0.56  | -15.97                     | 0.52  | -16.96                     | 0.17  | -17.73                     | 0.12  | -18.04                     | 0.14  |
| ETL                     | PYRI        | -21.08                     | 0.08  | -                          | -     | -16.11                     | 0.80  | -15.54                     | 0.30  | -15.02                     | 0.16  | -17.27                     | 0.15  |
| ETL                     | H2O         | -21.01                     | 0.06  | -21.76                     | 1.20  | -16.52                     | 1.30  | -20.29                     | 0.14  | -15.64                     | 0.13  | -12.93                     | 0.13  |
| ETL                     | C2CL2       | -14.0                      | 1.52  | -                          | -     | -12.63                     | 0.61  | -16.13                     | 0.21  | -12.25                     | 0.12  | -13.06                     | 0.10  |
| ETL                     | EAE         | -17.29                     | 0.25  | -21.52                     | 0.77  | -16.01                     | 0.66  | -16.24                     | 0.15  | -19.06                     | 0.21  | -17.46                     | 0.17  |
| ETL                     | PTL         | -19.47                     | 0.0   | -25.42                     | 1.91  | -18.41                     | 1.30  | -17.47                     | 0.38  | -17.70                     | 0.48  | -15.97                     | 0.45  |
| ETL                     | MTL         | -22.2                      | 0.01  | -26.75                     | 1.09  | -20.60                     | 0.66  | -21.17                     | 0.25  | -19.68                     | 0.18  | -18.48                     | 0.17  |
| ETL                     | ETL         | -21.25                     | 0.08  | -26.49                     | 1.47  | -19.73                     | 0.97  | -20.02                     | 0.27  | -19.28                     | 0.35  | -17.97                     | 0.18  |
| ETL                     | BTL         | -20.5                      | 0.29  | -23.29                     | 2.08  | -19.85                     | 1.70  | -18.57                     | 0.33  | -18.45                     | 0.60  | -16.82                     | 0.27  |
| ETL                     | 2M2P        | -21.13                     | 0.0   | -23.32                     | 1.63  | -23.76                     | 2.72  | -18.76                     | 0.42  | -18.63                     | 0.71  | -16.98                     | 0.48  |
| ETL                     | 1PL         | -20.22                     | 0.37  | -26.59                     | 1.57  | -18.68                     | 0.96  | -18.96                     | 0.24  | -18.84                     | 0.34  | -16.65                     | 0.26  |
| ETL                     | 2PL         | -20.64                     | 0.28  | -25.71                     | 1.55  | -19.34                     | 1.99  | -19.01                     | 0.37  | -18.16                     | 0.43  | -17.20                     | 0.33  |
| ETL                     | ANLN        | -18.12                     | 0.22  | -25.37                     | 2.86  | -17.08                     | 0.77  | -18.83                     | 0.45  | -17.10                     | 0.71  | -17.82                     | 0.79  |
| ETL                     | DEE         | -11.31                     | -     | -12.04                     | 0.47  | -13.27                     | 0.51  | -14.97                     | 0.13  | -11.47                     | 0.15  | -14.05                     | 0.14  |
| ETL                     | CHCL3       | -16.46                     | 0.22  | -12.47                     | 0.54  | -13.18                     | 0.81  | -18.90                     | 0.25  | -13.05                     | 0.15  | -13.53                     | 0.15  |
| ETL                     | DEAN        | -20.21                     | -     | -22.66                     | 1.02  | -11.33                     | 0.52  | -17.34                     | 0.19  | -15.51                     | 0.23  | -19.03                     | 0.16  |
| ETL                     | TEAN        | -17.27                     | 0.26  | -11.65                     | 0.62  | -7.11                      | 0.54  | -12.67                     | 0.19  | -6.83                      | 0.13  | -16.76                     | 0.21  |
| ETL                     | TOL         | -13.69                     | 0.5   | -13.78                     | 0.62  | -11.13                     | 0.64  | -13.11                     | 0.20  | -10.84                     | 0.17  | -12.92                     | 0.15  |
| ETL                     | BZN         | -14.18                     | 0.32  | -16.14                     | 0.66  | -12.32                     | 0.68  | -13.32                     | 0.15  | -12.88                     | 0.13  | -13.11                     | 0.15  |
| ETL                     | HPE         | -9.07                      | 0.13  | -7.94                      | 0.40  | -6.12                      | 0.44  | -6.72                      | 0.12  | -5.27                      | 0.11  | -7.56                      | 0.09  |
| ETL                     | HXE         | -10.8                      | 0.59  | -7.99                      | 0.40  | -6.68                      | 0.38  | -6.83                      | 0.11  | -5.72                      | 0.14  | -7.87                      | 0.10  |
| ETL                     | CCL4        | -12.05                     | 0.52  | -8.66                      | 0.56  | -6.67                      | 0.77  | -                          | -     | -6.62                      | 0.16  | -9.01                      | 0.11  |
| ETL                     | CHE         | -10.49                     | 0.54  | -7.92                      | 0.50  | -6.54                      | 0.43  | -6.61                      | 0.13  | -5.07                      | 0.18  | -7.73                      | 0.18  |
| BTL                     | DAMD        | -25.8                      | 0.29  | -                          | -     | -24.77                     | 1.23  | -20.70                     | 0.47  | -27.97                     | 0.26  | -26.96                     | 0.22  |
| BTL                     | PPN         | -23.98                     | -     | -26.06                     | 0.75  | -23.50                     | 0.75  | -21.72                     | 0.15  | -26.02                     | 0.19  | -24.15                     | 0.22  |
| BTL                     | BTN         | -23.54                     | 0.08  | -25.39                     | 0.71  | -23.42                     | 0.72  | -21.09                     | 0.16  | -25.78                     | 0.21  | -24.00                     | 0.20  |
| BTL                     | PYRI        | -26.01                     | 0.02  | -                          | -     | -24.09                     | 0.96  | -19.79                     | 0.34  | -23.64                     | 0.24  | -22.94                     | 0.31  |
| BTL                     | H2O         | -19.68                     | 0.06  | -21.74                     | 1.64  | -18.58                     | 1.75  | -18.28                     | 0.15  | -20.14                     | 0.20  | -12.25                     | 0.15  |
| BTL                     | C2CL2       | -20.6                      | 0.01  | -                          | -     | -20.43                     | 0.86  | -20.65                     | 0.37  | -20.54                     | 0.27  | -19.93                     | 0.19  |
| BTL                     | EAE         | -23.03                     | 1.11  | -27.23                     | 1.00  | -23.02                     | 0.88  | -20.77                     | 0.23  | -26.96                     | 0.24  | -24.17                     | 0.25  |
| BTL                     | PTL         | -25.41                     | 0.0   | -29.45                     | 2.63  | -26.51                     | 1.54  | -21.48                     | 0.47  | -28.55                     | 0.81  | -22.27                     | 0.51  |
| BTL                     | MTL         | -26.02                     | 0.02  | -31.99                     | 1.40  | -27.74                     | 0.95  | -23.37                     | 0.25  | -28.06                     | 0.24  | -23.86                     | 0.18  |
| BTL                     | ETL         | -26.47                     | 0.02  | -31.77                     | 1.63  | -27.93                     | 1.36  | -22.85                     | 0.37  | -27.91                     | 0.42  | -23.37                     | 0.26  |
| BTL                     | BTL         | -25.45                     | 0.13  | -31.83                     | 1.80  | -27.87                     | 2.34  | -22.00                     | 0.39  | -28.15                     | 0.67  | -22.96                     | 0.52  |
| BTL                     | 2M2P        | -26.32                     | 0.0   | -29.00                     | 1.79  | -27.48                     | 3.55  | -22.76                     | 0.45  | -28.04                     | 0.76  | -23.07                     | 0.50  |

Table S.1 – Continued on next page

Table S.1 – Continued from previous page

| Solute (A)              | Solvent (B) | Experimental               |       | GROMOS-54A7                |       | GROMOS-ATB                 |       | OPLS-LBCC                  |       | AMBER-GAFF2                |       | OpenFF                     |       |
|-------------------------|-------------|----------------------------|-------|----------------------------|-------|----------------------------|-------|----------------------------|-------|----------------------------|-------|----------------------------|-------|
|                         |             | $\Delta_s G_{A:B}^\ominus$ | $\pm$ |
| [kJ·mol <sup>-1</sup> ] |             |                            |       |                            |       |                            |       |                            |       |                            |       |                            |       |
| BTL                     | 1PL         | -25.51                     | 0.02  | -30.98                     | 2.04  | -27.71                     | 1.45  | -22.87                     | 0.35  | -27.66                     | 0.75  | -23.13                     | 0.32  |
| BTL                     | 2PL         | -25.96                     | 0.22  | -31.04                     | 1.40  | -30.12                     | 2.09  | -21.97                     | 0.44  | -27.50                     | 0.51  | -22.85                     | 0.40  |
| BTL                     | ANLN        | -22.53                     | 0.02  | -32.84                     | 3.49  | -23.96                     | 1.10  | -22.16                     | 0.48  | -25.72                     | 0.89  | -20.16                     | 0.99  |
| BTL                     | DEE         | -18.44                     | -     | -18.71                     | 0.60  | -20.97                     | 0.63  | -19.81                     | 0.20  | -19.05                     | 0.14  | -20.93                     | 0.17  |
| BTL                     | CHCL3       | -22.09                     | 0.03  | -20.33                     | 0.79  | -21.04                     | 1.06  | -25.02                     | 0.23  | -22.48                     | 0.25  | -21.76                     | 0.18  |
| BTL                     | DEAN        | -23.01                     | -     | -29.74                     | 1.19  | -19.25                     | 0.72  | -21.79                     | 0.19  | -24.70                     | 0.30  | -25.79                     | 0.23  |
| BTL                     | TEAN        | -21.01                     | -     | -18.61                     | 0.80  | -14.62                     | 0.82  | -17.66                     | 0.33  | -14.66                     | 0.21  | -23.47                     | 0.34  |
| BTL                     | TOL         | -18.19                     | 0.36  | -20.41                     | 0.80  | -19.23                     | 0.82  | -18.58                     | 0.25  | -19.09                     | 0.22  | -19.71                     | 0.19  |
| BTL                     | BZN         | -18.6                      | 0.02  | -23.04                     | 0.85  | -20.30                     | 0.90  | -18.90                     | 0.27  | -20.99                     | 0.25  | -19.75                     | 0.18  |
| BTL                     | HPE         | -15.4                      | 0.14  | -14.53                     | 0.57  | -13.59                     | 0.55  | -13.22                     | 0.14  | -13.14                     | 0.23  | -14.72                     | 0.15  |
| BTL                     | HXE         | -15.77                     | 0.06  | -15.00                     | 0.52  | -13.50                     | 0.58  | -13.13                     | 0.12  | -13.39                     | 0.14  | -15.04                     | 0.10  |
| BTL                     | CCL4        | -17.84                     | 0.4   | -15.55                     | 0.85  | -14.05                     | 1.05  | -                          | -     | -15.45                     | 0.17  | -17.13                     | 0.17  |
| BTL                     | CHE         | -14.73                     | 0.03  | -15.55                     | 0.68  | -13.65                     | 0.60  | -13.05                     | 0.22  | -13.01                     | 0.37  | -15.26                     | 0.27  |
| 2M2P                    | DAMD        | -21.18                     | -     | -                          | -     | -28.89                     | 1.34  | -19.04                     | 0.34  | -25.55                     | 0.30  | -24.91                     | 0.28  |
| 2M2P                    | PPN         | -20.66                     | -     | -19.59                     | 0.71  | -26.42                     | 0.75  | -20.69                     | 0.16  | -24.02                     | 0.19  | -22.99                     | 0.17  |
| 2M2P                    | BTN         | -20.23                     | 0.27  | -18.68                     | 0.73  | -25.89                     | 0.75  | -19.91                     | 0.20  | -23.64                     | 0.17  | -22.72                     | 0.24  |
| 2M2P                    | PYRI        | -21.82                     | 0.3   | -                          | -     | -26.15                     | 1.19  | -19.09                     | 0.54  | -20.72                     | 0.27  | -21.52                     | 0.22  |
| 2M2P                    | H2O         | -18.71                     | 0.02  | -12.87                     | 1.57  | -21.74                     | 1.58  | -19.61                     | 0.21  | -16.39                     | 0.17  | -12.82                     | 0.17  |
| 2M2P                    | C2CL2       | -22.61                     | -     | -                          | -     | -22.79                     | 0.79  | -19.93                     | 0.31  | -19.06                     | 0.25  | -19.43                     | 0.18  |
| 2M2P                    | EAE         | -21.41                     | -     | -19.07                     | 1.04  | -26.15                     | 0.86  | -20.00                     | 0.24  | -24.90                     | 0.23  | -22.57                     | 0.18  |
| 2M2P                    | PTL         | -20.95                     | -     | -21.75                     | 2.19  | -30.81                     | 1.49  | -20.79                     | 0.58  | -24.34                     | 0.66  | -21.14                     | 0.46  |
| 2M2P                    | MTL         | -24.71                     | 0.02  | -22.64                     | 1.40  | -30.17                     | 0.87  | -22.76                     | 0.32  | -24.60                     | 0.30  | -23.56                     | 0.19  |
| 2M2P                    | ETL         | -23.45                     | 0.01  | -23.12                     | 1.64  | -31.17                     | 1.22  | -21.65                     | 0.34  | -25.48                     | 0.31  | -22.49                     | 0.28  |
| 2M2P                    | BTL         | -21.46                     | 0.0   | -19.25                     | 1.94  | -31.40                     | 2.26  | -21.07                     | 0.44  | -25.15                     | 0.69  | -21.89                     | 0.47  |
| 2M2P                    | 2M2P        | -21.01                     | 0.0   | -20.37                     | 1.60  | -35.68                     | 2.44  | -21.58                     | 0.51  | -23.31                     | 0.83  | -21.30                     | 0.43  |
| 2M2P                    | 1PL         | -22.04                     | -     | -19.83                     | 2.23  | -29.99                     | 1.34  | -21.35                     | 0.37  | -24.38                     | 0.68  | -21.70                     | 0.41  |
| 2M2P                    | 2PL         | -22.31                     | 0.01  | -18.61                     | 2.08  | -32.82                     | 2.29  | -21.30                     | 0.56  | -23.76                     | 0.52  | -22.09                     | 0.35  |
| 2M2P                    | ANLN        | -19.81                     | -     | -22.57                     | 3.24  | -27.60                     | 1.22  | -21.52                     | 0.56  | -19.73                     | 0.86  | -20.81                     | 0.86  |
| 2M2P                    | DEE         | -17.47                     | -     | -13.64                     | 0.57  | -23.55                     | 0.78  | -17.75                     | 0.21  | -17.49                     | 0.15  | -18.73                     | 0.22  |
| 2M2P                    | CHCL3       | -18.73                     | 0.06  | -14.55                     | 0.80  | -24.15                     | 1.06  | -24.98                     | 0.32  | -20.81                     | 0.20  | -20.58                     | 0.23  |
| 2M2P                    | DEAN        | -19.69                     | -     | -19.76                     | 1.25  | -21.59                     | 0.63  | -19.39                     | 0.22  | -20.33                     | 0.28  | -22.39                     | 0.25  |
| 2M2P                    | TEAN        | -18.84                     | -     | -12.82                     | 0.79  | -18.21                     | 0.67  | -15.42                     | 0.26  | -13.49                     | 0.17  | -19.50                     | 0.36  |
| 2M2P                    | TOL         | -15.59                     | 0.06  | -15.31                     | 0.75  | -21.84                     | 0.83  | -17.42                     | 0.26  | -16.98                     | 0.18  | -18.23                     | 0.28  |
| 2M2P                    | BZN         | -15.46                     | 0.01  | -16.71                     | 0.93  | -22.06                     | 0.79  | -17.80                     | 0.23  | -18.92                     | 0.20  | -18.45                     | 0.18  |
| 2M2P                    | HPE         | -12.7                      | 0.08  | -10.23                     | 0.60  | -16.32                     | 0.61  | -12.46                     | 0.18  | -12.25                     | 0.14  | -13.51                     | 0.11  |
| 2M2P                    | HXE         | -12.9                      | -     | -10.75                     | 0.55  | -16.31                     | 0.50  | -12.47                     | 0.13  | -12.82                     | 0.19  | -13.91                     | 0.15  |
| 2M2P                    | CCL4        | -14.23                     | 0.26  | -10.87                     | 0.78  | -18.15                     | 1.03  | -                          | -     | -14.48                     | 0.21  | -16.20                     | 0.19  |
| 2M2P                    | CHE         | -12.25                     | 0.04  | -10.67                     | 0.70  | -16.45                     | 0.57  | -12.90                     | 0.16  | -12.89                     | 0.38  | -14.02                     | 0.22  |
| 1PL                     | DAMD        | -22.89                     | -     | -                          | -     | -18.23                     | 1.01  | -18.16                     | 0.32  | -24.30                     | 0.29  | -23.65                     | 0.26  |
| 1PL                     | PPN         | -20.78                     | -     | -22.72                     | 0.61  | -18.16                     | 0.62  | -18.77                     | 0.17  | -22.31                     | 0.15  | -20.98                     | 0.16  |
| 1PL                     | BTN         | -20.72                     | 0.03  | -21.97                     | 0.61  | -17.84                     | 0.62  | -18.63                     | 0.16  | -21.68                     | 0.20  | -21.01                     | 0.20  |
| 1PL                     | PYRI        | -23.3                      | 0.06  | -                          | -     | -17.71                     | 0.93  | -17.07                     | 0.43  | -19.70                     | 0.24  | -20.17                     | 0.24  |
| 1PL                     | H2O         | -20.16                     | 0.08  | -20.93                     | 1.47  | -12.77                     | 1.40  | -18.55                     | 0.17  | -19.95                     | 0.15  | -12.28                     | 0.16  |
| 1PL                     | C2CL2       | -16.75                     | 0.93  | -                          | -     | -15.42                     | 0.75  | -18.21                     | 0.29  | -17.26                     | 0.22  | -16.79                     | 0.19  |
| 1PL                     | EAE         | -20.31                     | 0.1   | -24.21                     | 0.91  | -17.36                     | 0.75  | -18.20                     | 0.24  | -23.30                     | 0.26  | -20.86                     | 0.20  |
| 1PL                     | PTL         | -22.72                     | 0.0   | -30.26                     | 2.11  | -18.37                     | 1.30  | -18.05                     | 0.47  | -23.01                     | 0.70  | -19.46                     | 0.34  |
| 1PL                     | MTL         | -24.88                     | 0.02  | -29.11                     | 1.38  | -20.05                     | 0.84  | -21.14                     | 0.26  | -25.38                     | 0.23  | -21.29                     | 0.15  |
| 1PL                     | ETL         | -23.97                     | 0.02  | -28.87                     | 1.73  | -20.40                     | 1.22  | -20.67                     | 0.33  | -24.40                     | 0.27  | -20.43                     | 0.24  |
| 1PL                     | BTL         | -21.87                     | 0.0   | -26.27                     | 2.30  | -18.45                     | 1.71  | -19.21                     | 0.39  | -24.21                     | 0.44  | -19.64                     | 0.51  |
| 1PL                     | 2M2P        | -21.75                     | 1.05  | -27.21                     | 1.41  | -20.73                     | 3.57  | -19.53                     | 0.53  | -24.85                     | 0.84  | -19.64                     | 0.49  |

Table S.1 – Continued on next page

Table S.1 – Continued from previous page

| Solute (A)              | Solvent (B) | Experimental               |       | GROMOS-54A7                |       | GROMOS-ATB                 |       | OPLS-LBCC                  |       | AMBER-GAFF2                |       | OpenFF                     |       |
|-------------------------|-------------|----------------------------|-------|----------------------------|-------|----------------------------|-------|----------------------------|-------|----------------------------|-------|----------------------------|-------|
|                         |             | $\Delta_s G_{A:B}^\ominus$ | $\pm$ |
| [kJ·mol <sup>-1</sup> ] |             |                            |       |                            |       |                            |       |                            |       |                            |       |                            |       |
| 1PL                     | 1PL         | -22.59                     | 0.23  | -28.11                     | 1.56  | -19.12                     | 1.08  | -19.33                     | 0.38  | -24.85                     | 0.60  | -19.57                     | 0.32  |
| 1PL                     | 2PL         | -23.22                     | 0.15  | -28.35                     | 1.52  | -19.49                     | 1.88  | -19.48                     | 0.47  | -23.63                     | 0.54  | -20.03                     | 0.36  |
| 1PL                     | ANLN        | -19.69                     | -     | -26.50                     | 3.36  | -18.70                     | 1.03  | -19.13                     | 0.60  | -24.29                     | 0.72  | -18.19                     | 0.72  |
| 1PL                     | DEE         | -15.93                     | -     | -15.23                     | 0.58  | -15.44                     | 0.58  | -16.63                     | 0.16  | -15.14                     | 0.13  | -17.24                     | 0.13  |
| 1PL                     | CHCL3       | -18.46                     | 0.07  | -16.25                     | 0.77  | -16.93                     | 0.93  | -21.99                     | 0.18  | -19.01                     | 0.21  | -17.39                     | 0.20  |
| 1PL                     | DEAN        | -18.04                     | -     | -25.32                     | 1.20  | -13.74                     | 0.54  | -18.46                     | 0.22  | -19.95                     | 0.32  | -22.30                     | 0.20  |
| 1PL                     | TEAN        | -19.07                     | -     | -15.37                     | 0.81  | -9.80                      | 0.64  | -14.35                     | 0.26  | -10.92                     | 0.25  | -20.00                     | 0.31  |
| 1PL                     | TOL         | -15.55                     | 0.06  | -17.19                     | 0.67  | -13.73                     | 0.70  | -15.21                     | 0.24  | -14.93                     | 0.20  | -16.20                     | 0.16  |
| 1PL                     | BZN         | -16.2                      | 0.01  | -19.09                     | 0.77  | -15.75                     | 0.80  | -15.43                     | 0.18  | -17.22                     | 0.21  | -16.63                     | 0.18  |
| 1PL                     | HPE         | -12.59                     | 0.04  | -11.22                     | 0.54  | -10.06                     | 0.59  | -9.98                      | 0.15  | -9.06                      | 0.17  | -10.86                     | 0.13  |
| 1PL                     | HXE         | -11.9                      | 0.32  | -11.48                     | 0.46  | -9.81                      | 0.50  | -9.78                      | 0.15  | -9.70                      | 0.10  | -11.62                     | 0.14  |
| 1PL                     | CCL4        | -15.13                     | 0.16  | -12.24                     | 0.68  | -9.88                      | 0.92  | -                          | -     | -11.61                     | 0.20  | -12.77                     | 0.15  |
| 1PL                     | CHE         | -11.48                     | 0.15  | -11.98                     | 0.60  | -10.19                     | 0.58  | -10.20                     | 0.16  | -9.13                      | 0.20  | -11.65                     | 0.19  |
| 2PL                     | DAMD        | -22.64                     | 0.25  | -                          | -     | -27.20                     | 1.10  | -18.76                     | 0.39  | -23.07                     | 0.25  | -23.47                     | 0.20  |
| 2PL                     | PPN         | -19.64                     | -     | -19.90                     | 0.64  | -23.94                     | 0.62  | -19.73                     | 0.23  | -21.49                     | 0.16  | -20.58                     | 0.15  |
| 2PL                     | BTN         | -19.5                      | 0.25  | -18.92                     | 0.68  | -23.66                     | 0.63  | -19.16                     | 0.19  | -20.64                     | 0.24  | -20.46                     | 0.17  |
| 2PL                     | PYRI        | -21.45                     | 0.34  | -                          | -     | -24.27                     | 1.04  | -18.06                     | 0.34  | -18.87                     | 0.22  | -19.36                     | 0.22  |
| 2PL                     | H2O         | -19.86                     | 0.03  | -17.33                     | 1.42  | -21.93                     | 1.53  | -20.11                     | 0.19  | -18.08                     | 0.16  | -12.75                     | 0.13  |
| 2PL                     | C2CL2       | -20.72                     | -     | -                          | -     | -20.47                     | 0.71  | -18.30                     | 0.28  | -16.32                     | 0.17  | -16.53                     | 0.17  |
| 2PL                     | EAE         | -17.79                     | 0.25  | -20.20                     | 0.87  | -23.88                     | 0.81  | -18.32                     | 0.22  | -22.11                     | 0.22  | -20.24                     | 0.22  |
| 2PL                     | PTL         | -20.89                     | 0.0   | -23.98                     | 2.08  | -27.24                     | 1.57  | -19.91                     | 0.61  | -21.68                     | 0.65  | -18.82                     | 0.38  |
| 2PL                     | MTL         | -20.66                     | -     | -25.55                     | 1.35  | -28.53                     | 0.86  | -21.96                     | 0.16  | -23.89                     | 0.25  | -20.91                     | 0.17  |
| 2PL                     | ETL         | -22.03                     | 0.01  | -24.11                     | 1.44  | -28.05                     | 1.13  | -21.62                     | 0.40  | -23.20                     | 0.39  | -20.46                     | 0.21  |
| 2PL                     | BTL         | -21.01                     | 0.0   | -25.65                     | 1.82  | -26.67                     | 1.93  | -20.62                     | 0.42  | -22.69                     | 0.60  | -19.28                     | 0.37  |
| 2PL                     | 2M2P        | -21.01                     | 0.0   | -24.39                     | 1.45  | -26.56                     | 3.69  | -21.26                     | 0.54  | -22.63                     | 0.75  | -19.56                     | 0.40  |
| 2PL                     | 1PL         | -20.94                     | 0.01  | -25.34                     | 1.87  | -27.90                     | 1.20  | -21.15                     | 0.31  | -22.96                     | 0.51  | -19.89                     | 0.37  |
| 2PL                     | 2PL         | -20.67                     | 0.29  | -21.69                     | 1.79  | -30.52                     | 2.07  | -21.07                     | 0.47  | -22.95                     | 0.59  | -20.40                     | 0.34  |
| 2PL                     | ANLN        | -21.81                     | -     | -26.08                     | 3.30  | -25.14                     | 0.95  | -19.81                     | 0.54  | -21.22                     | 0.53  | -18.41                     | 0.50  |
| 2PL                     | DEE         | -18.21                     | -     | -13.15                     | 0.51  | -21.25                     | 0.57  | -16.97                     | 0.16  | -14.80                     | 0.16  | -16.72                     | 0.18  |
| 2PL                     | CHCL3       | -17.91                     | 0.02  | -13.25                     | 0.73  | -20.87                     | 0.90  | -22.07                     | 0.28  | -17.92                     | 0.15  | -17.62                     | 0.20  |
| 2PL                     | DEAN        | -16.9                      | -     | -21.36                     | 1.24  | -19.37                     | 0.60  | -19.24                     | 0.25  | -18.72                     | 0.27  | -21.37                     | 0.25  |
| 2PL                     | TEAN        | -18.1                      | -     | -12.08                     | 0.70  | -14.96                     | 0.70  | -14.69                     | 0.28  | -10.38                     | 0.18  | -18.44                     | 0.24  |
| 2PL                     | TOL         | -14.73                     | -     | -14.64                     | 0.70  | -17.72                     | 0.69  | -15.47                     | 0.23  | -14.40                     | 0.20  | -15.78                     | 0.16  |
| 2PL                     | BZN         | -14.55                     | 0.02  | -15.88                     | 0.72  | -18.71                     | 0.75  | -15.54                     | 0.20  | -16.44                     | 0.20  | -16.46                     | 0.14  |
| 2PL                     | HPE         | -10.25                     | 0.66  | -9.55                      | 0.54  | -12.65                     | 0.53  | -9.85                      | 0.12  | -8.75                      | 0.13  | -10.76                     | 0.14  |
| 2PL                     | HXE         | -10.59                     | 0.94  | -9.65                      | 0.48  | -12.86                     | 0.46  | -10.04                     | 0.09  | -9.32                      | 0.13  | -11.02                     | 0.10  |
| 2PL                     | CCL4        | -12.97                     | 0.42  | -10.40                     | 0.85  | -14.15                     | 0.89  | -                          | -     | -11.01                     | 0.15  | -12.78                     | 0.15  |
| 2PL                     | CHE         | -9.92                      | 0.0   | -9.65                      | 0.58  | -12.92                     | 0.51  | -10.16                     | 0.13  | -9.37                      | 0.20  | -11.47                     | 0.23  |
| ANLN                    | DAMD        | -30.89                     | -     | -                          | -     | -32.28                     | 1.38  | -31.64                     | 0.52  | -40.26                     | 0.44  | -37.35                     | 0.37  |
| ANLN                    | PPN         | -33.45                     | 0.31  | -34.28                     | 0.73  | -30.95                     | 0.76  | -30.74                     | 0.19  | -36.68                     | 0.18  | -32.86                     | 0.26  |
| ANLN                    | BTN         | -29.97                     | -     | -32.94                     | 0.81  | -30.22                     | 0.77  | -30.03                     | 0.24  | -35.97                     | 0.30  | -32.23                     | 0.25  |
| ANLN                    | PYRI        | -27.23                     | -     | -                          | -     | -25.95                     | 1.14  | -29.86                     | 0.31  | -34.85                     | 0.29  | -32.24                     | 0.28  |
| ANLN                    | H2O         | -23.16                     | 0.15  | -31.98                     | 2.00  | -21.56                     | 1.66  | -21.42                     | 0.14  | -27.63                     | 0.18  | -22.17                     | 0.29  |
| ANLN                    | C2CL2       | -31.3                      | 0.77  | -                          | -     | -25.39                     | 0.95  | -29.66                     | 0.39  | -31.66                     | 0.21  | -28.08                     | 0.25  |
| ANLN                    | EAE         | -32.0                      | 0.33  | -37.39                     | 1.22  | -30.63                     | 0.96  | -30.02                     | 0.32  | -37.58                     | 0.30  | -33.17                     | 0.41  |
| ANLN                    | PTL         | -27.57                     | 0.63  | -33.54                     | 2.32  | -25.13                     | 1.58  | -27.89                     | 0.54  | -30.93                     | 0.80  | -27.27                     | 0.55  |
| ANLN                    | MTL         | -31.61                     | 0.02  | -39.43                     | 1.85  | -26.20                     | 0.94  | -29.48                     | 0.26  | -32.51                     | 0.31  | -30.80                     | 0.21  |
| ANLN                    | ETL         | -30.41                     | 0.03  | -36.57                     | 1.90  | -24.09                     | 1.14  | -28.93                     | 0.26  | -31.20                     | 0.36  | -29.17                     | 0.26  |
| ANLN                    | BTL         | -28.15                     | -     | -36.41                     | 2.45  | -23.62                     | 1.59  | -27.94                     | 0.43  | -30.58                     | 0.71  | -27.98                     | 0.46  |
| ANLN                    | 2M2P        | -35.28                     | -     | -32.94                     | 2.14  | -26.10                     | 3.09  | -28.92                     | 0.50  | -29.47                     | 0.81  | -26.97                     | 0.66  |

Table S.1 – Continued on next page

Table S.1 – Continued from previous page

| Solute (A)              | Solvent (B) | Experimental               |       | GROMOS-54A7                |       | GROMOS-ATB                 |       | OPLS-LBCC                  |       | AMBER-GAFF2                |       | OpenFF                     |       |
|-------------------------|-------------|----------------------------|-------|----------------------------|-------|----------------------------|-------|----------------------------|-------|----------------------------|-------|----------------------------|-------|
|                         |             | $\Delta_s G_{A:B}^\ominus$ | $\pm$ |
| [kJ·mol <sup>-1</sup> ] |             |                            |       |                            |       |                            |       |                            |       |                            |       |                            |       |
| ANLN                    | 1PL         | -28.2                      | -     | -34.13                     | 2.20  | -25.70                     | 1.19  | -28.66                     | 0.41  | -31.49                     | 0.68  | -28.23                     | 0.43  |
| ANLN                    | 2PL         | -31.46                     | -     | -32.76                     | 1.99  | -24.00                     | 2.14  | -28.17                     | 0.40  | -29.90                     | 0.51  | -27.99                     | 0.38  |
| ANLN                    | ANLN        | -31.47                     | 0.26  | -45.66                     | 4.01  | -25.48                     | 1.07  | -28.91                     | 0.63  | -39.27                     | 1.11  | -30.77                     | 0.73  |
| ANLN                    | DEE         | -31.17                     | -     | -23.86                     | 0.64  | -25.76                     | 0.75  | -15.93                     | 0.17  | -27.73                     | 0.28  | -27.14                     | 0.24  |
| ANLN                    | CHCL3       | -30.95                     | 0.58  | -26.15                     | 0.94  | -26.73                     | 1.22  | -31.37                     | 0.28  | -32.87                     | 0.28  | -28.41                     | 0.32  |
| ANLN                    | DEAN        | -26.66                     | -     | -34.12                     | 1.51  | -22.68                     | 0.65  | -17.49                     | 0.23  | -31.15                     | 0.29  | -30.44                     | 0.28  |
| ANLN                    | TEAN        | -23.46                     | -     | -24.07                     | 0.88  | -20.42                     | 0.81  | -23.52                     | 0.22  | -23.84                     | 0.21  | -27.83                     | 0.29  |
| ANLN                    | TOL         | -28.07                     | 0.14  | -28.63                     | 0.93  | -23.17                     | 0.96  | -26.12                     | 0.24  | -28.58                     | 0.28  | -25.79                     | 0.23  |
| ANLN                    | BZN         | -28.81                     | 0.02  | -31.00                     | 1.04  | -25.03                     | 1.02  | -26.72                     | 0.27  | -31.42                     | 0.22  | -26.88                     | 0.16  |
| ANLN                    | HPE         | -22.52                     | 0.02  | -19.00                     | 0.62  | -19.58                     | 0.64  | -19.88                     | 0.15  | -21.44                     | 0.17  | -18.57                     | 0.19  |
| ANLN                    | HXE         | -22.75                     | 0.03  | -19.27                     | 0.57  | -20.02                     | 0.72  | -20.09                     | 0.15  | -21.52                     | 0.15  | -18.85                     | 0.11  |
| ANLN                    | CCL4        | -25.5                      | 0.02  | -19.32                     | 0.83  | -20.26                     | 1.24  | -                          | -     | -23.10                     | 0.23  | -20.50                     | 0.18  |
| ANLN                    | CHE         | -23.11                     | 0.01  | -19.68                     | 0.73  | -19.49                     | 0.70  | -20.63                     | 0.18  | -21.90                     | 0.29  | -19.33                     | 0.24  |
| DEE                     | DAMD        | -13.99                     | -     | -                          | -     | -13.90                     | 1.12  | -11.39                     | 0.38  | -12.62                     | 0.26  | -13.30                     | 0.16  |
| DEE                     | PPN         | -16.67                     | -     | -16.18                     | 0.70  | -16.43                     | 0.63  | -14.04                     | 0.16  | -13.96                     | 0.22  | -14.60                     | 0.14  |
| DEE                     | BTN         | -16.27                     | -     | -15.98                     | 0.56  | -16.71                     | 0.72  | -14.34                     | 0.22  | -13.92                     | 0.19  | -14.85                     | 0.16  |
| DEE                     | PYRI        | -16.33                     | -     | -                          | -     | -18.11                     | 1.00  | -12.38                     | 0.33  | -13.94                     | 0.20  | -15.27                     | 0.24  |
| DEE                     | H2O         | -7.22                      | 0.33  | 3.22                       | 1.35  | -3.51                      | 1.44  | -7.73                      | 0.19  | 1.32                       | 0.18  | -2.14                      | 0.14  |
| DEE                     | C2CL2       | -14.69                     | 0.32  | -                          | -     | -17.69                     | 0.76  | -14.75                     | 0.39  | -15.52                     | 0.21  | -17.04                     | 0.17  |
| DEE                     | EAE         | -17.13                     | -     | -14.53                     | 0.85  | -16.34                     | 0.82  | -14.00                     | 0.31  | -13.70                     | 0.19  | -14.78                     | 0.21  |
| DEE                     | PTL         | -13.08                     | 0.0   | -14.70                     | 0.97  | -15.80                     | 1.00  | -13.96                     | 0.30  | -12.81                     | 0.33  | -15.22                     | 0.30  |
| DEE                     | MTL         | -13.64                     | 0.0   | -12.21                     | 0.96  | -14.99                     | 0.78  | -12.44                     | 0.15  | -11.65                     | 0.15  | -15.43                     | 0.16  |
| DEE                     | ETL         | -16.44                     | -     | -13.37                     | 0.88  | -14.78                     | 0.99  | -12.94                     | 0.30  | -12.17                     | 0.25  | -15.11                     | 0.21  |
| DEE                     | BTL         | -12.96                     | 0.0   | -13.98                     | 1.01  | -15.95                     | 1.30  | -13.81                     | 0.30  | -12.18                     | 0.34  | -14.99                     | 0.36  |
| DEE                     | 2M2P        | -14.33                     | -     | -13.96                     | 0.88  | -16.03                     | 2.23  | -12.77                     | 0.44  | -13.15                     | 0.39  | -14.69                     | 0.36  |
| DEE                     | 1PL         | -15.3                      | -     | -13.72                     | 0.92  | -15.98                     | 0.92  | -13.30                     | 0.24  | -12.41                     | 0.32  | -15.27                     | 0.23  |
| DEE                     | 2PL         | -14.79                     | -     | -14.10                     | 1.06  | -14.71                     | 1.33  | -12.59                     | 0.44  | -12.84                     | 0.38  | -14.92                     | 0.28  |
| DEE                     | ANLN        | -16.55                     | 0.75  | -11.28                     | 2.26  | -17.69                     | 0.89  | -16.63                     | 0.45  | -11.92                     | 0.96  | -13.51                     | 0.56  |
| DEE                     | DEE         | -14.39                     | 0.0   | -16.25                     | 0.52  | -17.54                     | 0.60  | -14.56                     | 0.15  | -14.89                     | 0.11  | -15.86                     | 0.14  |
| DEE                     | CHCL3       | -17.92                     | 0.29  | -17.33                     | 0.79  | -20.92                     | 1.00  | -20.07                     | 0.34  | -18.10                     | 0.17  | -19.22                     | 0.21  |
| DEE                     | DEAN        | -15.07                     | -     | -15.59                     | 0.82  | -17.42                     | 0.55  | -14.52                     | 0.15  | -14.77                     | 0.16  | -15.74                     | 0.17  |
| DEE                     | TEAN        | -15.19                     | -     | -15.85                     | 0.66  | -16.25                     | 0.70  | -13.53                     | 0.16  | -13.64                     | 0.26  | -15.13                     | 0.18  |
| DEE                     | TOL         | -13.93                     | 0.0   | -16.43                     | 0.72  | -17.24                     | 0.74  | -14.57                     | 0.27  | -15.04                     | 0.20  | -15.52                     | 0.17  |
| DEE                     | BZN         | -17.76                     | -     | -16.42                     | 0.83  | -19.01                     | 0.79  | -14.81                     | 0.23  | -14.51                     | 0.16  | -16.19                     | 0.19  |
| DEE                     | HPE         | -13.7                      | -     | -15.18                     | 0.63  | -15.36                     | 0.57  | -12.23                     | 0.15  | -13.19                     | 0.14  | -13.90                     | 0.14  |
| DEE                     | HXE         | -14.61                     | -     | -15.90                     | 0.49  | -15.92                     | 0.52  | -12.62                     | 0.13  | -13.76                     | 0.14  | -14.33                     | 0.12  |
| DEE                     | CCL4        | -14.98                     | 0.31  | -16.75                     | 0.83  | -16.37                     | 0.98  | -                          | -     | -15.78                     | 0.20  | -16.65                     | 0.26  |
| DEE                     | CHE         | -12.66                     | 0.01  | -16.07                     | 0.69  | -16.04                     | 0.60  | -12.60                     | 0.18  | -13.42                     | 0.30  | -14.53                     | 0.20  |
| CHCL3                   | DAMD        | -21.47                     | 0.43  | -                          | -     | -22.26                     | 1.07  | -23.46                     | 0.41  | -18.67                     | 0.32  | -18.40                     | 0.21  |
| CHCL3                   | PPN         | -19.5                      | 0.02  | -17.69                     | 0.71  | -21.14                     | 0.65  | -24.27                     | 0.19  | -18.14                     | 0.17  | -18.15                     | 0.17  |
| CHCL3                   | BTN         | -19.79                     | 0.02  | -17.64                     | 0.62  | -21.13                     | 0.66  | -24.93                     | 0.20  | -18.42                     | 0.20  | -18.09                     | 0.22  |
| CHCL3                   | PYRI        | -19.47                     | 0.13  | -                          | -     | -21.17                     | 0.94  | -22.24                     | 0.36  | -16.91                     | 0.24  | -17.20                     | 0.23  |
| CHCL3                   | H2O         | -4.61                      | 0.09  | 2.14                       | 1.52  | -4.68                      | 1.38  | -6.29                      | 0.16  | 0.57                       | 0.15  | 0.14                       | 0.14  |
| CHCL3                   | C2CL2       | -16.1                      | 1.37  | -                          | -     | -20.17                     | 0.68  | -19.78                     | 0.34  | -15.63                     | 0.18  | -16.45                     | 0.16  |
| CHCL3                   | EAE         | -19.37                     | 0.04  | -16.86                     | 0.83  | -22.54                     | 0.79  | -22.80                     | 0.24  | -18.74                     | 0.23  | -18.26                     | 0.25  |
| CHCL3                   | PTL         | -15.62                     | -     | -15.94                     | 1.04  | -19.63                     | 1.12  | -25.04                     | 0.39  | -15.66                     | 0.47  | -16.87                     | 0.32  |
| CHCL3                   | MTL         | -17.69                     | 0.02  | -14.54                     | 0.81  | -18.12                     | 0.58  | -20.61                     | 0.22  | -14.27                     | 0.17  | -15.91                     | 0.13  |
| CHCL3                   | ETL         | -17.46                     | 0.01  | -15.51                     | 0.93  | -18.69                     | 0.74  | -23.39                     | 0.25  | -15.55                     | 0.20  | -16.10                     | 0.19  |
| CHCL3                   | BTL         | -16.84                     | 0.0   | -15.62                     | 1.01  | -20.02                     | 1.06  | -24.04                     | 0.38  | -15.92                     | 0.41  | -16.36                     | 0.30  |
| CHCL3                   | 2M2P        | -24.55                     | -     | -15.25                     | 0.98  | -19.82                     | 2.26  | -25.84                     | 0.41  | -15.68                     | 0.57  | -16.81                     | 0.42  |

Table S.1 – Continued on next page

Table S.1 – Continued from previous page

| Solute (A)              | Solvent (B) | Experimental               |       | GROMOS-54A7                |       | GROMOS-ATB                 |       | OPLS-LBCC                  |       | AMBER-GAFF2                |       | OpenFF                     |       |
|-------------------------|-------------|----------------------------|-------|----------------------------|-------|----------------------------|-------|----------------------------|-------|----------------------------|-------|----------------------------|-------|
|                         |             | $\Delta_s G_{A:B}^\ominus$ | $\pm$ |
| [kJ·mol <sup>-1</sup> ] |             |                            |       |                            |       |                            |       |                            |       |                            |       |                            |       |
| CHCL3                   | 1PL         | -17.59                     | -     | -15.94                     | 1.03  | -19.41                     | 0.88  | -24.29                     | 0.33  | -16.17                     | 0.37  | -16.81                     | 0.26  |
| CHCL3                   | 2PL         | -19.36                     | -     | -15.12                     | 1.02  | -20.40                     | 1.33  | -25.12                     | 0.28  | -15.72                     | 0.33  | -16.39                     | 0.25  |
| CHCL3                   | ANLN        | -16.21                     | 0.01  | -15.56                     | 2.62  | -20.78                     | 0.94  | -21.33                     | 0.43  | -12.75                     | 0.70  | -14.43                     | 0.66  |
| CHCL3                   | DEE         | -16.1                      | -     | -17.44                     | 0.49  | -21.94                     | 0.60  | -24.62                     | 0.18  | -17.31                     | 0.19  | -18.43                     | 0.15  |
| CHCL3                   | CHCL3       | -17.47                     | 0.11  | -18.03                     | 0.65  | -20.94                     | 1.01  | -20.39                     | 0.27  | -15.70                     | 0.19  | -16.42                     | 0.26  |
| CHCL3                   | DEAN        | -18.56                     | -     | -16.77                     | 0.83  | -20.12                     | 0.51  | -27.80                     | 0.19  | -18.37                     | 0.18  | -19.76                     | 0.20  |
| CHCL3                   | TEAN        | -23.58                     | -     | -16.72                     | 0.70  | -19.26                     | 0.68  | -24.23                     | 0.27  | -16.01                     | 0.18  | -19.29                     | 0.29  |
| CHCL3                   | TOL         | -16.3                      | 1.52  | -17.20                     | 0.69  | -21.39                     | 0.71  | -22.77                     | 0.24  | -17.45                     | 0.21  | -17.85                     | 0.22  |
| CHCL3                   | BZN         | -13.25                     | -     | -17.57                     | 0.69  | -21.62                     | 0.93  | -22.31                     | 0.38  | -18.10                     | 0.22  | -17.42                     | 0.19  |
| CHCL3                   | HPE         | -15.02                     | 0.12  | -16.46                     | 0.56  | -17.25                     | 0.59  | -16.37                     | 0.15  | -14.47                     | 0.14  | -14.89                     | 0.17  |
| CHCL3                   | HXE         | -13.59                     | 0.69  | -16.13                     | 0.51  | -17.44                     | 0.51  | -16.38                     | 0.12  | -14.91                     | 0.16  | -15.39                     | 0.13  |
| CHCL3                   | CCL4        | -16.79                     | 0.0   | -17.12                     | 0.88  | -19.71                     | 0.87  | -                          | -     | -14.52                     | 0.17  | -15.15                     | 0.31  |
| CHCL3                   | CHE         | -16.53                     | 1.05  | -17.29                     | 0.65  | -17.46                     | 0.64  | -17.14                     | 0.23  | -15.08                     | 0.21  | -15.89                     | 0.20  |
| DEAN                    | DAMD        | -12.62                     | -     | -                          | -     | -14.54                     | 1.13  | -14.99                     | 0.32  | -17.82                     | 0.24  | -16.62                     | 0.26  |
| DEAN                    | PPN         | -16.41                     | 0.71  | -19.81                     | 0.66  | -16.94                     | 0.69  | -17.21                     | 0.18  | -17.91                     | 0.18  | -17.39                     | 0.16  |
| DEAN                    | BTN         | -14.79                     | -     | -19.38                     | 0.73  | -17.65                     | 0.68  | -16.86                     | 0.17  | -17.73                     | 0.19  | -17.54                     | 0.23  |
| DEAN                    | PYRI        | -19.3                      | -     | -                          | -     | -17.00                     | 0.89  | -16.72                     | 0.28  | -17.42                     | 0.24  | -18.00                     | 0.29  |
| DEAN                    | H2O         | -17.01                     | 0.01  | -9.18                      | 1.72  | -3.34                      | 1.75  | -15.32                     | 0.19  | -6.68                      | 0.20  | -12.16                     | 0.14  |
| DEAN                    | C2CL2       | -16.72                     | 0.02  | -                          | -     | -16.78                     | 0.80  | -17.65                     | 0.35  | -18.12                     | 0.24  | -19.41                     | 0.24  |
| DEAN                    | EAE         | -15.98                     | 0.29  | -19.64                     | 1.01  | -18.11                     | 0.72  | -17.48                     | 0.20  | -18.27                     | 0.26  | -17.23                     | 0.28  |
| DEAN                    | PTL         | -19.39                     | 2.79  | -18.11                     | 2.64  | -15.93                     | 1.00  | -17.45                     | 0.44  | -15.45                     | 0.73  | -21.33                     | 0.39  |
| DEAN                    | MTL         | -21.29                     | 0.02  | -20.98                     | 1.53  | -14.74                     | 0.71  | -18.01                     | 0.25  | -16.71                     | 0.24  | -23.87                     | 0.20  |
| DEAN                    | ETL         | -16.56                     | -     | -21.34                     | 1.87  | -14.87                     | 0.87  | -17.38                     | 0.35  | -17.06                     | 0.37  | -22.57                     | 0.34  |
| DEAN                    | BTL         | -19.43                     | 2.12  | -22.41                     | 2.16  | -15.20                     | 1.05  | -17.61                     | 0.35  | -16.13                     | 0.50  | -21.83                     | 0.45  |
| DEAN                    | 2M2P        | -22.1                      | -     | -17.87                     | 1.57  | -18.02                     | 2.04  | -16.54                     | 0.38  | -15.46                     | 0.50  | -19.83                     | 0.55  |
| DEAN                    | 1PL         | -17.98                     | -     | -17.73                     | 2.00  | -15.66                     | 0.91  | -17.66                     | 0.37  | -16.57                     | 0.63  | -21.86                     | 0.33  |
| DEAN                    | 2PL         | -17.3                      | -     | -19.40                     | 1.97  | -15.44                     | 1.32  | -17.88                     | 0.44  | -15.35                     | 0.49  | -21.13                     | 0.35  |
| DEAN                    | ANLN        | -24.04                     | -     | -18.91                     | 3.50  | -16.77                     | 0.91  | -19.03                     | 0.50  | -16.94                     | 1.07  | -17.52                     | 0.65  |
| DEAN                    | DEE         | -15.07                     | -     | -17.28                     | 0.59  | -18.61                     | 0.57  | -16.72                     | 0.20  | -16.74                     | 0.14  | -17.32                     | 0.14  |
| DEAN                    | CHCL3       | -21.84                     | 0.13  | -18.31                     | 0.87  | -18.51                     | 0.94  | -24.51                     | 0.25  | -20.66                     | 0.25  | -22.44                     | 0.20  |
| DEAN                    | DEAN        | -16.79                     | -     | -19.48                     | 1.10  | -17.76                     | 0.66  | -17.06                     | 0.20  | -16.97                     | 0.24  | -17.84                     | 0.20  |
| DEAN                    | TEAN        | -17.3                      | -     | -16.32                     | 0.76  | -17.28                     | 0.71  | -15.57                     | 0.28  | -15.12                     | 0.16  | -16.39                     | 0.19  |
| DEAN                    | TOL         | -15.69                     | 0.0   | -18.71                     | 0.80  | -19.15                     | 0.75  | -16.67                     | 0.24  | -16.82                     | 0.30  | -17.61                     | 0.19  |
| DEAN                    | BZN         | -16.82                     | 0.02  | -19.79                     | 0.92  | -19.71                     | 0.91  | -17.41                     | 0.23  | -16.75                     | 0.24  | -17.96                     | 0.17  |
| DEAN                    | HPE         | -13.93                     | 0.46  | -14.95                     | 0.64  | -16.72                     | 0.58  | -14.31                     | 0.15  | -14.60                     | 0.12  | -14.91                     | 0.19  |
| DEAN                    | HXE         | -14.88                     | 0.09  | -14.95                     | 0.57  | -17.09                     | 0.60  | -14.58                     | 0.13  | -14.66                     | 0.16  | -15.23                     | 0.11  |
| DEAN                    | CCL4        | -17.23                     | 0.02  | -15.78                     | 0.83  | -18.90                     | 1.07  | -                          | -     | -16.78                     | 0.16  | -17.55                     | 0.23  |
| DEAN                    | CHE         | -15.12                     | 0.01  | -15.09                     | 0.68  | -17.46                     | 0.61  | -14.58                     | 0.17  | -14.58                     | 0.26  | -15.34                     | 0.16  |
| TEAN                    | DAMD        | -16.9                      | -     | -                          | -     | -21.55                     | 1.33  | -15.40                     | 0.46  | -18.21                     | 0.30  | -18.84                     | 0.30  |
| TEAN                    | PPN         | -18.44                     | 1.48  | -22.18                     | 0.82  | -22.30                     | 0.81  | -19.35                     | 0.21  | -19.69                     | 0.17  | -20.03                     | 0.16  |
| TEAN                    | BTN         | -17.41                     | 0.0   | -22.51                     | 0.96  | -23.69                     | 0.89  | -19.52                     | 0.29  | -19.81                     | 0.20  | -20.44                     | 0.22  |
| TEAN                    | PYRI        | -19.18                     | -     | -                          | -     | -25.44                     | 1.17  | -19.05                     | 0.60  | -19.51                     | 0.23  | -22.13                     | 0.24  |
| TEAN                    | H2O         | -12.86                     | 0.35  | 1.61                       | 1.90  | 2.01                       | 1.92  | -8.30                      | 0.25  | 4.56                       | 0.15  | -9.23                      | 0.18  |
| TEAN                    | C2CL2       | -19.26                     | 0.85  | -                          | -     | -24.70                     | 0.92  | -20.02                     | 0.38  | -22.42                     | 0.31  | -23.91                     | 0.25  |
| TEAN                    | EAE         | -17.6                      | 0.19  | -21.42                     | 1.12  | -24.43                     | 0.91  | -20.26                     | 0.33  | -19.94                     | 0.26  | -20.78                     | 0.28  |
| TEAN                    | PTL         | -20.78                     | 0.0   | -21.25                     | 1.37  | -23.59                     | 1.01  | -19.80                     | 0.47  | -19.73                     | 0.27  | -25.30                     | 0.57  |
| TEAN                    | MTL         | -21.91                     | 0.02  | -17.03                     | 1.29  | -19.82                     | 0.73  | -16.75                     | 0.27  | -15.53                     | 0.20  | -25.75                     | 0.29  |
| TEAN                    | ETL         | -20.37                     | 0.02  | -19.15                     | 1.37  | -21.15                     | 0.98  | -18.28                     | 0.35  | -18.46                     | 0.19  | -25.50                     | 0.39  |
| TEAN                    | BTL         | -20.33                     | 0.0   | -20.11                     | 1.32  | -22.22                     | 1.30  | -19.72                     | 0.37  | -18.57                     | 0.31  | -24.79                     | 0.52  |
| TEAN                    | 2M2P        | -18.33                     | 0.0   | -20.45                     | 1.13  | -26.39                     | 2.28  | -19.23                     | 0.39  | -20.01                     | 0.41  | -21.36                     | 0.51  |

Table S.1 – Continued on next page

Table S.1 – Continued from previous page

| Solute (A)              | Solvent (B) | Experimental               |       | GROMOS-54A7                |       | GROMOS-ATB                 |       | OPLS-LBCC                  |       | AMBER-GAFF2                |       | OpenFF                     |       |
|-------------------------|-------------|----------------------------|-------|----------------------------|-------|----------------------------|-------|----------------------------|-------|----------------------------|-------|----------------------------|-------|
|                         |             | $\Delta_s G_{A:B}^\ominus$ | $\pm$ |
| [kJ·mol <sup>-1</sup> ] |             |                            |       |                            |       |                            |       |                            |       |                            |       |                            |       |
| TEAN                    | 1PL         | -19.98                     | 0.01  | -19.98                     | 1.42  | -22.56                     | 0.97  | -19.56                     | 0.31  | -17.88                     | 0.31  | -24.73                     | 0.53  |
| TEAN                    | 2PL         | -18.89                     | 0.0   | -20.16                     | 1.25  | -22.27                     | 1.52  | -18.66                     | 0.50  | -18.81                     | 0.33  | -23.85                     | 0.60  |
| TEAN                    | ANLN        | -29.97                     | -     | -20.80                     | 3.18  | -23.81                     | 1.08  | -21.25                     | 0.65  | -16.89                     | 0.85  | -17.58                     | 0.86  |
| TEAN                    | DEE         | -18.61                     | 0.0   | -22.64                     | 0.74  | -26.12                     | 0.74  | -21.27                     | 0.19  | -21.89                     | 0.22  | -22.18                     | 0.25  |
| TEAN                    | CHCL3       | -24.09                     | 0.0   | -24.85                     | 1.05  | -27.54                     | 1.15  | -27.62                     | 0.30  | -24.92                     | 0.29  | -27.61                     | 0.28  |
| TEAN                    | DEAN        | -21.35                     | -     | -21.26                     | 0.96  | -26.52                     | 0.72  | -20.94                     | 0.23  | -21.72                     | 0.18  | -21.45                     | 0.27  |
| TEAN                    | TEAN        | -19.0                      | 0.42  | -22.86                     | 0.92  | -26.83                     | 0.92  | -21.56                     | 0.23  | -22.04                     | 0.29  | -21.67                     | 0.29  |
| TEAN                    | TOL         | -19.61                     | 0.08  | -23.55                     | 0.97  | -27.56                     | 0.82  | -21.30                     | 0.31  | -22.00                     | 0.27  | -22.23                     | 0.28  |
| TEAN                    | BZN         | -19.61                     | 0.31  | -23.14                     | 0.92  | -27.74                     | 1.03  | -21.99                     | 0.41  | -21.13                     | 0.23  | -22.83                     | 0.25  |
| TEAN                    | HPE         | -18.69                     | 0.03  | -22.03                     | 0.68  | -26.00                     | 0.66  | -20.45                     | 0.20  | -21.91                     | 0.21  | -20.48                     | 0.18  |
| TEAN                    | HXE         | -18.87                     | 0.08  | -22.33                     | 0.69  | -26.25                     | 0.70  | -20.72                     | 0.20  | -22.10                     | 0.18  | -20.65                     | 0.12  |
| TEAN                    | CCL4        | -19.68                     | 0.75  | -23.83                     | 0.97  | -27.14                     | 1.11  | -                          | -     | -25.17                     | 0.22  | -24.04                     | 0.29  |
| TEAN                    | CHE         | -19.55                     | 0.2   | -23.18                     | 0.99  | -26.07                     | 0.74  | -21.08                     | 0.19  | -22.76                     | 0.30  | -21.50                     | 0.25  |
| TOL                     | DAMD        | -20.88                     | 0.1   | -                          | -     | -20.09                     | 1.23  | -19.94                     | 0.46  | -20.21                     | 0.27  | -17.77                     | 0.21  |
| TOL                     | PPN         | -20.8                      | 0.06  | -21.79                     | 0.66  | -21.52                     | 0.67  | -22.35                     | 0.23  | -20.65                     | 0.19  | -18.73                     | 0.17  |
| TOL                     | BTN         | -21.31                     | 0.06  | -21.79                     | 0.77  | -21.82                     | 0.67  | -21.78                     | 0.21  | -20.63                     | 0.19  | -19.02                     | 0.17  |
| TOL                     | PYRI        | -21.43                     | 0.04  | -                          | -     | -22.47                     | 1.10  | -21.36                     | 0.44  | -20.13                     | 0.33  | -18.55                     | 0.34  |
| TOL                     | H2O         | -3.45                      | 0.24  | -3.14                      | 1.50  | -1.94                      | 1.66  | -7.15                      | 0.21  | -2.98                      | 0.17  | -3.40                      | 0.18  |
| TOL                     | C2CL2       | -22.21                     | 0.0   | -                          | -     | -22.22                     | 0.76  | -22.17                     | 0.30  | -22.97                     | 0.23  | -20.74                     | 0.21  |
| TOL                     | EAE         | -21.07                     | 0.03  | -20.99                     | 0.93  | -21.69                     | 0.81  | -21.80                     | 0.22  | -20.30                     | 0.20  | -18.26                     | 0.30  |
| TOL                     | PTL         | -18.53                     | 0.43  | -18.90                     | 1.28  | -20.73                     | 0.97  | -20.39                     | 0.42  | -18.73                     | 0.46  | -18.08                     | 0.30  |
| TOL                     | MTL         | -18.21                     | 0.0   | -17.58                     | 0.99  | -18.16                     | 0.71  | -18.21                     | 0.26  | -16.55                     | 0.28  | -18.41                     | 0.17  |
| TOL                     | ETL         | -18.8                      | 0.16  | -18.39                     | 1.01  | -18.98                     | 0.88  | -19.22                     | 0.25  | -18.17                     | 0.24  | -18.34                     | 0.24  |
| TOL                     | BTL         | -18.91                     | 0.05  | -20.04                     | 1.16  | -19.75                     | 1.02  | -19.70                     | 0.26  | -18.18                     | 0.35  | -18.10                     | 0.33  |
| TOL                     | 2M2P        | -18.44                     | 0.0   | -19.17                     | 1.00  | -19.80                     | 2.04  | -20.33                     | 0.39  | -18.66                     | 0.43  | -17.34                     | 0.43  |
| TOL                     | 1PL         | -18.85                     | 0.07  | -19.13                     | 1.07  | -19.55                     | 0.91  | -20.33                     | 0.31  | -18.47                     | 0.43  | -17.82                     | 0.27  |
| TOL                     | 2PL         | -18.36                     | 0.02  | -18.95                     | 1.06  | -19.55                     | 1.47  | -19.58                     | 0.33  | -18.27                     | 0.37  | -17.54                     | 0.27  |
| TOL                     | ANLN        | -19.35                     | 0.1   | -18.92                     | 2.58  | -20.68                     | 1.09  | -21.34                     | 0.57  | -16.13                     | 0.93  | -17.47                     | 0.72  |
| TOL                     | DEE         | -21.18                     | 0.0   | -21.59                     | 0.61  | -22.63                     | 0.63  | -21.83                     | 0.15  | -20.71                     | 0.16  | -19.42                     | 0.13  |
| TOL                     | CHCL3       | -22.98                     | 0.09  | -22.62                     | 0.97  | -24.05                     | 1.13  | -27.48                     | 0.33  | -24.81                     | 0.23  | -23.00                     | 0.25  |
| TOL                     | DEAN        | -19.87                     | -     | -21.13                     | 1.00  | -22.52                     | 0.68  | -21.56                     | 0.23  | -21.18                     | 0.28  | -19.51                     | 0.19  |
| TOL                     | TEAN        | -20.58                     | 0.15  | -20.67                     | 0.70  | -22.04                     | 0.76  | -21.17                     | 0.20  | -19.85                     | 0.22  | -18.42                     | 0.18  |
| TOL                     | TOL         | -21.58                     | 0.09  | -21.37                     | 0.80  | -21.96                     | 0.81  | -22.02                     | 0.23  | -20.66                     | 0.20  | -19.03                     | 0.17  |
| TOL                     | BZN         | -22.25                     | 0.02  | -22.03                     | 0.83  | -22.76                     | 0.83  | -22.75                     | 0.21  | -20.91                     | 0.26  | -19.60                     | 0.19  |
| TOL                     | HPE         | -19.98                     | 0.08  | -20.12                     | 0.59  | -21.35                     | 0.60  | -19.29                     | 0.20  | -19.13                     | 0.10  | -17.20                     | 0.20  |
| TOL                     | HXE         | -20.19                     | 0.14  | -19.69                     | 0.62  | -21.26                     | 0.58  | -19.19                     | 0.14  | -19.56                     | 0.14  | -17.35                     | 0.17  |
| TOL                     | CCL4        | -21.59                     | 0.29  | -20.31                     | 1.14  | -21.86                     | 1.17  | -                          | -     | -21.18                     | 0.22  | -18.84                     | 0.24  |
| TOL                     | CHE         | -20.48                     | 0.02  | -20.22                     | 0.65  | -21.53                     | 0.71  | -19.68                     | 0.24  | -19.72                     | 0.19  | -17.78                     | 0.25  |
| BZN                     | DAMD        | -18.66                     | 0.01  | -                          | -     | -17.77                     | 1.20  | -16.96                     | 0.41  | -17.97                     | 0.23  | -15.16                     | 0.27  |
| BZN                     | PPN         | -18.31                     | 0.02  | -18.70                     | 0.67  | -18.32                     | 0.69  | -18.70                     | 0.16  | -18.57                     | 0.17  | -16.09                     | 0.16  |
| BZN                     | BTN         | -18.68                     | 0.05  | -18.65                     | 0.73  | -18.40                     | 0.71  | -18.82                     | 0.21  | -18.18                     | 0.19  | -16.02                     | 0.16  |
| BZN                     | PYRI        | -18.88                     | 0.01  | -                          | -     | -18.57                     | 1.09  | -17.83                     | 0.28  | -18.48                     | 0.32  | -15.96                     | 0.23  |
| BZN                     | H2O         | -3.67                      | 0.05  | -5.40                      | 1.57  | -4.03                      | 1.52  | -5.97                      | 0.20  | -7.07                      | 0.16  | -3.36                      | 0.14  |
| BZN                     | C2CL2       | -18.92                     | 0.03  | -                          | -     | -18.93                     | 0.74  | -18.78                     | 0.26  | -20.04                     | 0.22  | -17.44                     | 0.22  |
| BZN                     | EAE         | -18.58                     | 0.04  | -17.98                     | 0.90  | -18.80                     | 0.71  | -19.03                     | 0.20  | -18.43                     | 0.23  | -16.22                     | 0.19  |
| BZN                     | PTL         | -15.81                     | 0.6   | -16.57                     | 1.18  | -17.67                     | 0.89  | -16.96                     | 0.32  | -15.17                     | 0.33  | -14.14                     | 0.38  |
| BZN                     | MTL         | -15.89                     | 0.04  | -16.23                     | 0.91  | -15.98                     | 0.59  | -15.61                     | 0.17  | -15.42                     | 0.17  | -15.32                     | 0.15  |
| BZN                     | ETL         | -15.87                     | 0.0   | -16.47                     | 1.05  | -16.70                     | 0.77  | -16.43                     | 0.20  | -16.03                     | 0.25  | -14.75                     | 0.20  |
| BZN                     | BTL         | -15.83                     | 0.95  | -15.81                     | 1.12  | -16.19                     | 0.97  | -16.84                     | 0.37  | -15.19                     | 0.36  | -14.51                     | 0.32  |
| BZN                     | 2M2P        | -15.53                     | 0.0   | -16.43                     | 1.06  | -17.95                     | 2.01  | -17.64                     | 0.47  | -15.54                     | 0.56  | -14.73                     | 0.33  |

Table S.1 – Continued on next page



Table S.1 – Continued from previous page

| Solute (A)              | Solvent (B) | Experimental               |       | GROMOS-54A7                |       | GROMOS-ATB                 |       | OPLS-LBCC                  |       | AMBER-GAFF2                |       | OpenFF                     |       |
|-------------------------|-------------|----------------------------|-------|----------------------------|-------|----------------------------|-------|----------------------------|-------|----------------------------|-------|----------------------------|-------|
|                         |             | $\Delta_s G_{A:B}^\ominus$ | $\pm$ |
| [kJ·mol <sup>-1</sup> ] |             |                            |       |                            |       |                            |       |                            |       |                            |       |                            |       |
| BZN                     | 1PL         | -15.87                     | 0.0   | -15.61                     | 1.07  | -16.87                     | 0.81  | -17.28                     | 0.26  | -15.55                     | 0.24  | -14.87                     | 0.22  |
| BZN                     | 2PL         | -15.74                     | 0.25  | -16.02                     | 1.05  | -15.88                     | 1.21  | -16.74                     | 0.25  | -15.16                     | 0.20  | -14.54                     | 0.30  |
| BZN                     | ANLN        | -17.01                     | 0.03  | -14.98                     | 3.05  | -17.09                     | 1.09  | -17.76                     | 0.41  | -16.98                     | 0.85  | -14.25                     | 0.87  |
| BZN                     | DEE         | -27.69                     | -     | -18.04                     | 0.53  | -19.23                     | 0.51  | -18.59                     | 0.18  | -17.41                     | 0.17  | -15.88                     | 0.17  |
| BZN                     | CHCL3       | -19.5                      | 0.24  | -18.80                     | 0.94  | -20.68                     | 0.99  | -22.65                     | 0.30  | -22.17                     | 0.20  | -18.65                     | 0.22  |
| BZN                     | DEAN        | -18.56                     | -     | -18.60                     | 0.87  | -19.24                     | 0.52  | -18.01                     | 0.16  | -18.03                     | 0.21  | -15.91                     | 0.16  |
| BZN                     | TEAN        | -18.84                     | -     | -17.12                     | 0.71  | -18.31                     | 0.62  | -17.82                     | 0.19  | -15.69                     | 0.15  | -15.32                     | 0.13  |
| BZN                     | TOL         | -18.55                     | 0.08  | -17.59                     | 0.81  | -18.52                     | 0.73  | -18.71                     | 0.24  | -17.71                     | 0.14  | -15.79                     | 0.15  |
| BZN                     | BZN         | -19.06                     | 0.01  | -18.06                     | 0.91  | -19.13                     | 0.88  | -18.85                     | 0.18  | -18.47                     | 0.22  | -16.13                     | 0.17  |
| BZN                     | HPE         | -16.74                     | 0.07  | -16.17                     | 0.55  | -17.91                     | 0.59  | -16.21                     | 0.17  | -15.21                     | 0.21  | -13.77                     | 0.16  |
| BZN                     | HXE         | -16.63                     | 0.08  | -16.61                     | 0.57  | -17.55                     | 0.51  | -16.51                     | 0.14  | -15.67                     | 0.10  | -13.96                     | 0.12  |
| BZN                     | CCL4        | -18.76                     | 0.13  | -16.50                     | 0.75  | -18.26                     | 1.05  | -                          | -     | -17.19                     | 0.24  | -15.23                     | 0.20  |
| BZN                     | CHE         | -17.42                     | 0.2   | -17.32                     | 0.68  | -17.63                     | 0.58  | -16.84                     | 0.23  | -15.48                     | 0.30  | -14.06                     | 0.24  |
| HPE                     | DAMD        | -14.5                      | 0.03  | -                          | -     | -13.21                     | 1.47  | -9.15                      | 0.48  | -17.98                     | 0.26  | -12.52                     | 0.27  |
| HPE                     | PPN         | -16.17                     | 0.06  | -20.09                     | 0.72  | -17.57                     | 0.73  | -14.37                     | 0.20  | -19.15                     | 0.21  | -16.45                     | 0.22  |
| HPE                     | BTN         | -17.19                     | 0.05  | -20.40                     | 0.82  | -18.62                     | 0.73  | -15.03                     | 0.23  | -20.17                     | 0.15  | -16.97                     | 0.24  |
| HPE                     | PYRI        | -16.15                     | 0.01  | -                          | -     | -19.00                     | 1.19  | -11.32                     | 0.36  | -19.60                     | 0.29  | -16.83                     | 0.25  |
| HPE                     | H2O         | 11.1                       | 0.08  | 10.43                      | 1.83  | 9.98                       | 1.85  | 11.30                      | 0.15  | 9.52                       | 0.20  | 11.72                      | 0.20  |
| HPE                     | C2CL2       | -16.9                      | 0.08  | -                          | -     | -19.64                     | 0.93  | -11.56                     | 0.36  | -22.03                     | 0.21  | -19.40                     | 0.27  |
| HPE                     | EAE         | -17.23                     | 0.11  | -17.75                     | 1.09  | -18.62                     | 0.92  | -14.64                     | 0.31  | -19.59                     | 0.23  | -16.12                     | 0.30  |
| HPE                     | PTL         | -16.5                      | -     | -19.42                     | 1.24  | -19.71                     | 1.00  | -15.00                     | 0.25  | -19.65                     | 0.55  | -17.74                     | 0.29  |
| HPE                     | MTL         | -14.27                     | 0.0   | -15.03                     | 1.01  | -15.59                     | 0.85  | -7.97                      | 0.23  | -15.09                     | 0.20  | -15.36                     | 0.15  |
| HPE                     | ETL         | -15.46                     | 0.01  | -17.10                     | 1.09  | -18.20                     | 0.90  | -12.30                     | 0.22  | -17.73                     | 0.21  | -15.85                     | 0.21  |
| HPE                     | BTL         | -16.44                     | 0.0   | -19.78                     | 1.32  | -18.44                     | 1.20  | -14.34                     | 0.35  | -18.78                     | 0.47  | -16.91                     | 0.22  |
| HPE                     | 2M2P        | -16.56                     | 0.0   | -18.73                     | 1.05  | -19.69                     | 2.38  | -15.06                     | 0.42  | -20.48                     | 0.42  | -17.93                     | 0.29  |
| HPE                     | 1PL         | -15.63                     | 0.01  | -19.07                     | 1.29  | -18.17                     | 1.05  | -14.18                     | 0.16  | -18.31                     | 0.30  | -16.47                     | 0.24  |
| HPE                     | 2PL         | -16.0                      | 0.18  | -19.10                     | 1.19  | -18.80                     | 1.44  | -14.10                     | 0.31  | -18.95                     | 0.29  | -16.95                     | 0.30  |
| HPE                     | ANLN        | -12.35                     | 0.06  | -13.45                     | 2.68  | -17.97                     | 1.06  | -10.71                     | 0.62  | -14.11                     | 0.82  | -10.69                     | 0.96  |
| HPE                     | DEE         | -17.98                     | -     | -22.86                     | 0.71  | -22.06                     | 0.74  | -18.04                     | 0.21  | -22.68                     | 0.14  | -20.15                     | 0.13  |
| HPE                     | CHCL3       | -19.36                     | 0.0   | -23.56                     | 0.87  | -21.05                     | 1.03  | -17.54                     | 0.27  | -25.09                     | 0.21  | -22.52                     | 0.24  |
| HPE                     | DEAN        | -16.5                      | -     | -19.78                     | 0.80  | -22.11                     | 0.66  | -17.72                     | 0.19  | -22.04                     | 0.23  | -19.25                     | 0.21  |
| HPE                     | TEAN        | -19.58                     | 0.0   | -22.00                     | 0.85  | -22.44                     | 0.94  | -18.52                     | 0.22  | -23.02                     | 0.25  | -20.00                     | 0.22  |
| HPE                     | TOL         | -19.06                     | 0.01  | -22.02                     | 0.85  | -22.89                     | 0.93  | -17.00                     | 0.19  | -22.75                     | 0.22  | -20.05                     | 0.23  |
| HPE                     | BZN         | -19.08                     | 0.01  | -21.34                     | 0.91  | -23.69                     | 1.00  | -17.14                     | 0.28  | -21.44                     | 0.23  | -19.50                     | 0.26  |
| HPE                     | HPE         | -19.54                     | 0.06  | -22.03                     | 0.78  | -22.05                     | 0.74  | -18.68                     | 0.19  | -22.65                     | 0.21  | -20.46                     | 0.29  |
| HPE                     | HXE         | -19.98                     | 0.0   | -21.97                     | 0.77  | -22.03                     | 0.77  | -18.95                     | 0.24  | -23.05                     | 0.25  | -20.72                     | 0.13  |
| HPE                     | CCL4        | -19.9                      | 0.02  | -22.95                     | 1.06  | -22.15                     | 1.28  | -                          | -     | -26.10                     | 0.26  | -23.05                     | 0.32  |
| HPE                     | CHE         | -20.05                     | 0.02  | -22.96                     | 0.84  | -22.89                     | 0.81  | -18.69                     | 0.25  | -22.89                     | 0.27  | -20.86                     | 0.36  |
| HXE                     | DAMD        | -11.85                     | 0.07  | -                          | -     | -10.58                     | 1.30  | -6.89                      | 0.45  | -14.89                     | 0.33  | -10.13                     | 0.24  |
| HXE                     | PPN         | -13.52                     | 0.01  | -16.44                     | 0.69  | -14.58                     | 0.72  | -11.52                     | 0.15  | -15.65                     | 0.12  | -13.39                     | 0.15  |
| HXE                     | BTN         | -14.42                     | 0.02  | -17.24                     | 0.80  | -15.75                     | 0.66  | -11.59                     | 0.20  | -16.50                     | 0.12  | -14.06                     | 0.15  |
| HXE                     | PYRI        | -13.52                     | 0.01  | -                          | -     | -15.40                     | 1.08  | -8.12                      | 0.36  | -16.01                     | 0.18  | -13.83                     | 0.20  |
| HXE                     | H2O         | 10.4                       | 0.02  | 9.43                       | 1.56  | 8.32                       | 1.53  | 10.59                      | 0.14  | 9.26                       | 0.16  | 11.13                      | 0.20  |
| HXE                     | C2CL2       | -14.22                     | 0.08  | -                          | -     | -16.40                     | 0.80  | -9.00                      | 0.22  | -18.24                     | 0.20  | -15.79                     | 0.28  |
| HXE                     | EAE         | -14.49                     | 0.01  | -14.69                     | 1.05  | -15.68                     | 0.85  | -12.02                     | 0.25  | -16.00                     | 0.15  | -13.25                     | 0.16  |
| HXE                     | PTL         | -13.93                     | 0.0   | -17.02                     | 1.14  | -16.83                     | 0.97  | -11.71                     | 0.32  | -15.64                     | 0.40  | -13.92                     | 0.24  |
| HXE                     | MTL         | -11.69                     | 0.01  | -12.89                     | 0.93  | -13.03                     | 0.66  | -6.36                      | 0.22  | -12.64                     | 0.25  | -12.19                     | 0.12  |
| HXE                     | ETL         | -12.78                     | 0.01  | -14.49                     | 1.08  | -14.07                     | 0.82  | -9.90                      | 0.29  | -15.08                     | 0.23  | -13.30                     | 0.18  |
| HXE                     | BTL         | -13.86                     | 0.05  | -15.89                     | 1.15  | -16.41                     | 1.11  | -12.03                     | 0.21  | -15.69                     | 0.26  | -13.93                     | 0.29  |
| HXE                     | 2M2P        | -13.93                     | 0.0   | -16.72                     | 0.99  | -19.09                     | 2.10  | -12.09                     | 0.31  | -17.56                     | 0.44  | -14.55                     | 0.36  |

Table S.1 – Continued on next page

Table S.1 – Continued from previous page

| Solute (A)              | Solvent (B) | Experimental               |       | GROMOS-54A7                |       | GROMOS-ATB                 |       | OPLS-LBCC                  |       | AMBER-GAFF2                |       | OpenFF                     |       |
|-------------------------|-------------|----------------------------|-------|----------------------------|-------|----------------------------|-------|----------------------------|-------|----------------------------|-------|----------------------------|-------|
|                         |             | $\Delta_s G_{A:B}^\ominus$ | $\pm$ |
| [kJ·mol <sup>-1</sup> ] |             |                            |       |                            |       |                            |       |                            |       |                            |       |                            |       |
| HXE                     | IPL         | -13.02                     | 0.0   | -16.30                     | 1.07  | -15.54                     | 0.84  | -11.70                     | 0.25  | -14.86                     | 0.27  | -13.92                     | 0.18  |
| HXE                     | 2PL         | -13.53                     | 0.2   | -16.04                     | 1.02  | -16.60                     | 1.37  | -11.43                     | 0.20  | -15.57                     | 0.31  | -14.12                     | 0.25  |
| HXE                     | ANLN        | -10.02                     | 0.14  | -10.66                     | 2.59  | -14.89                     | 1.00  | -8.43                      | 0.51  | -10.89                     | 0.66  | -8.30                      | 0.53  |
| HXE                     | DEE         | -15.76                     | -     | -19.24                     | 0.63  | -18.21                     | 0.64  | -15.01                     | 0.14  | -18.84                     | 0.11  | -17.11                     | 0.19  |
| HXE                     | CHCL3       | -16.42                     | 0.03  | -19.94                     | 0.88  | -17.78                     | 1.01  | -14.73                     | 0.27  | -21.06                     | 0.18  | -18.83                     | 0.24  |
| HXE                     | DEAN        | -15.41                     | -     | -17.27                     | 0.84  | -18.90                     | 0.62  | -14.96                     | 0.20  | -18.95                     | 0.18  | -15.98                     | 0.14  |
| HXE                     | TEAN        | -16.62                     | 0.01  | -19.13                     | 0.73  | -18.13                     | 0.81  | -14.79                     | 0.17  | -19.26                     | 0.18  | -16.51                     | 0.21  |
| HXE                     | TOL         | -16.1                      | 0.0   | -18.42                     | 0.83  | -19.08                     | 0.80  | -14.09                     | 0.17  | -18.99                     | 0.13  | -16.34                     | 0.33  |
| HXE                     | BZN         | -15.31                     | 0.37  | -18.57                     | 0.98  | -19.82                     | 0.89  | -14.38                     | 0.17  | -17.94                     | 0.25  | -16.13                     | 0.21  |
| HXE                     | HPE         | -16.56                     | 0.0   | -18.36                     | 0.71  | -18.63                     | 0.67  | -15.78                     | 0.22  | -19.12                     | 0.15  | -16.85                     | 0.22  |
| HXE                     | HXE         | -16.88                     | 0.08  | -18.40                     | 0.68  | -18.82                     | 0.58  | -15.89                     | 0.21  | -19.17                     | 0.20  | -17.25                     | 0.10  |
| HXE                     | CCL4        | -16.98                     | 0.02  | -20.44                     | 0.96  | -19.06                     | 1.24  | -                          | -     | -22.28                     | 0.36  | -19.33                     | 0.21  |
| HXE                     | CHE         | -17.01                     | 0.0   | -19.11                     | 0.79  | -19.16                     | 0.67  | -15.78                     | 0.26  | -18.87                     | 0.20  | -16.98                     | 0.27  |
| CCL4                    | DAMD        | -18.88                     | 0.01  | -                          | -     | -18.26                     | 1.05  | -                          | -     | -15.79                     | 0.18  | -15.01                     | 0.30  |
| CCL4                    | PPN         | -17.17                     | 0.1   | -16.99                     | 0.58  | -18.22                     | 0.66  | -                          | -     | -16.14                     | 0.16  | -16.36                     | 0.18  |
| CCL4                    | BTN         | -17.35                     | 0.01  | -17.26                     | 0.73  | -18.66                     | 0.64  | -                          | -     | -16.77                     | 0.19  | -16.93                     | 0.16  |
| CCL4                    | PYRI        | -22.38                     | -     | -                          | -     | -20.89                     | 1.04  | -                          | -     | -15.38                     | 0.17  | -16.61                     | 0.16  |
| CCL4                    | H2O         | 0.3                        | 0.02  | 5.81                       | 1.52  | 0.67                       | 1.38  | -                          | -     | 5.78                       | 0.18  | 4.36                       | 0.10  |
| CCL4                    | C2CL2       | -16.36                     | 1.0   | -                          | -     | -18.95                     | 0.78  | -                          | -     | -16.38                     | 0.24  | -17.64                     | 0.21  |
| CCL4                    | EAE         | -17.69                     | 0.02  | -15.72                     | 0.83  | -20.59                     | 0.79  | -                          | -     | -16.82                     | 0.24  | -17.03                     | 0.19  |
| CCL4                    | PTL         | -14.16                     | -     | -16.49                     | 1.24  | -19.19                     | 0.83  | -                          | -     | -16.69                     | 0.32  | -17.98                     | 0.28  |
| CCL4                    | MTL         | -15.18                     | 0.02  | -13.47                     | 0.86  | -15.71                     | 0.67  | -                          | -     | -12.72                     | 0.19  | -15.29                     | 0.20  |
| CCL4                    | ETL         | -15.7                      | 0.0   | -14.66                     | 0.92  | -17.23                     | 0.74  | -                          | -     | -15.20                     | 0.13  | -16.54                     | 0.18  |
| CCL4                    | BTL         | -16.21                     | 0.0   | -15.36                     | 1.05  | -18.58                     | 1.26  | -                          | -     | -16.32                     | 0.26  | -17.57                     | 0.29  |
| CCL4                    | 2M2P        | -16.93                     | 1.29  | -15.41                     | 0.95  | -19.74                     | 1.79  | -                          | -     | -17.91                     | 0.38  | -17.36                     | 0.26  |
| CCL4                    | IPL         | -15.7                      | 0.0   | -15.22                     | 0.98  | -18.05                     | 0.71  | -                          | -     | -15.10                     | 0.37  | -16.92                     | 0.21  |
| CCL4                    | 2PL         | -16.44                     | -     | -14.80                     | 0.90  | -18.78                     | 1.38  | -                          | -     | -15.29                     | 0.30  | -16.92                     | 0.24  |
| CCL4                    | ANLN        | -14.72                     | 0.02  | -10.42                     | 2.46  | -18.67                     | 1.12  | -                          | -     | -9.64                      | 0.41  | -13.25                     | 0.86  |
| CCL4                    | DEE         | -18.38                     | 0.0   | -18.03                     | 0.55  | -21.36                     | 0.47  | -                          | -     | -18.46                     | 0.16  | -19.28                     | 0.16  |
| CCL4                    | CHCL3       | -18.56                     | 0.0   | -18.61                     | 0.86  | -23.10                     | 0.95  | -                          | -     | -17.54                     | 0.22  | -18.63                     | 0.15  |
| CCL4                    | DEAN        | -17.98                     | -     | -16.26                     | 0.73  | -21.33                     | 0.58  | -                          | -     | -18.29                     | 0.13  | -18.64                     | 0.18  |
| CCL4                    | TEAN        | -18.04                     | -     | -18.35                     | 0.67  | -22.39                     | 0.68  | -                          | -     | -18.82                     | 0.22  | -19.50                     | 0.16  |
| CCL4                    | TOL         | -18.2                      | 0.07  | -17.87                     | 0.87  | -22.07                     | 0.85  | -                          | -     | -18.33                     | 0.19  | -18.62                     | 0.18  |
| CCL4                    | BZN         | -15.93                     | -     | -16.71                     | 0.76  | -22.58                     | 0.78  | -                          | -     | -17.53                     | 0.22  | -18.20                     | 0.18  |
| CCL4                    | HPE         | -17.62                     | 0.49  | -18.10                     | 0.65  | -20.36                     | 0.57  | -                          | -     | -18.72                     | 0.21  | -19.16                     | 0.16  |
| CCL4                    | HXE         | -17.59                     | 0.29  | -18.38                     | 0.53  | -20.47                     | 0.57  | -                          | -     | -18.93                     | 0.16  | -19.52                     | 0.18  |
| CCL4                    | CCL4        | -18.5                      | 0.0   | -18.68                     | 0.92  | -23.86                     | 1.12  | -                          | -     | -18.25                     | 0.17  | -19.14                     | 0.21  |
| CCL4                    | CHE         | -17.93                     | -     | -18.55                     | 0.81  | -20.39                     | 0.63  | -                          | -     | -19.26                     | 0.25  | -20.33                     | 0.24  |
| CHE                     | DAMD        | -13.8                      | 0.21  | -                          | -     | -9.20                      | 1.22  | -9.75                      | 0.49  | -16.70                     | 0.29  | -13.72                     | 0.22  |
| CHE                     | PPN         | -14.83                     | 0.01  | -18.96                     | 0.67  | -13.52                     | 0.66  | -13.40                     | 0.16  | -17.34                     | 0.20  | -15.58                     | 0.18  |
| CHE                     | BTN         | -15.69                     | 0.01  | -18.52                     | 0.57  | -14.03                     | 0.69  | -13.64                     | 0.19  | -18.08                     | 0.16  | -16.06                     | 0.15  |
| CHE                     | PYRI        | -15.57                     | 0.02  | -                          | -     | -14.57                     | 1.06  | -11.87                     | 0.31  | -18.11                     | 0.31  | -16.41                     | 0.23  |
| CHE                     | H2O         | 4.77                       | 0.31  | 5.52                       | 1.34  | 6.70                       | 1.48  | 6.27                       | 0.17  | 4.39                       | 0.14  | 5.84                       | 0.11  |
| CHE                     | C2CL2       | -15.97                     | 0.03  | -                          | -     | -15.39                     | 0.78  | -12.16                     | 0.32  | -19.69                     | 0.25  | -18.29                     | 0.16  |
| CHE                     | EAE         | -15.71                     | 0.03  | -17.30                     | 0.89  | -14.64                     | 0.82  | -13.59                     | 0.25  | -18.33                     | 0.27  | -16.54                     | 0.18  |
| CHE                     | PTL         | -15.53                     | 0.0   | -17.84                     | 1.07  | -15.19                     | 0.95  | -14.16                     | 0.21  | -17.65                     | 0.27  | -16.55                     | 0.36  |
| CHE                     | MTL         | -13.86                     | 0.01  | -14.29                     | 0.71  | -11.67                     | 0.62  | -8.65                      | 0.19  | -13.88                     | 0.21  | -14.67                     | 0.13  |
| CHE                     | ETL         | -14.55                     | 0.02  | -15.66                     | 1.05  | -13.35                     | 0.78  | -11.56                     | 0.30  | -16.87                     | 0.16  | -15.65                     | 0.18  |
| CHE                     | BTL         | -15.4                      | 0.14  | -17.67                     | 1.19  | -14.47                     | 1.13  | -13.46                     | 0.30  | -17.53                     | 0.40  | -16.54                     | 0.24  |
| CHE                     | 2M2P        | -15.36                     | 0.0   | -17.71                     | 1.01  | -15.24                     | 2.10  | -14.18                     | 0.30  | -18.27                     | 0.44  | -16.89                     | 0.30  |

Table S.1 – Continued on next page

Table S.1 – Continued from previous page

| Solute (A)              | Solvent (B) | Experimental               |       | GROMOS-54A7                |       | GROMOS-ATB                 |       | OPLS-LBCC                  |       | AMBER-GAFF2                |       | OpenFF                     |       |
|-------------------------|-------------|----------------------------|-------|----------------------------|-------|----------------------------|-------|----------------------------|-------|----------------------------|-------|----------------------------|-------|
|                         |             | $\Delta_s G_{A:B}^\ominus$ | $\pm$ |
| [kJ·mol <sup>-1</sup> ] |             |                            |       |                            |       |                            |       |                            |       |                            |       |                            |       |
| CHE                     | 1PL         | -14.8                      | 0.27  | -17.22                     | 1.04  | -14.29                     | 0.86  | -12.96                     | 0.20  | -16.63                     | 0.31  | -16.48                     | 0.20  |
| CHE                     | 2PL         | -14.85                     | 0.2   | -17.65                     | 1.18  | -13.16                     | 1.24  | -13.02                     | 0.28  | -17.90                     | 0.28  | -16.25                     | 0.25  |
| CHE                     | ANLN        | -12.74                     | 0.07  | -15.79                     | 2.85  | -13.77                     | 1.01  | -11.27                     | 0.34  | -13.34                     | 1.10  | -12.32                     | 0.51  |
| CHE                     | DEE         | -17.53                     | 0.0   | -20.14                     | 0.50  | -16.39                     | 0.66  | -16.26                     | 0.23  | -20.42                     | 0.17  | -18.64                     | 0.12  |
| CHE                     | CHCL3       | -18.61                     | 0.01  | -21.55                     | 0.77  | -15.67                     | 0.98  | -16.49                     | 0.18  | -22.70                     | 0.23  | -20.62                     | 0.19  |
| CHE                     | DEAN        | -16.5                      | -     | -18.41                     | 0.76  | -17.36                     | 0.58  | -16.43                     | 0.22  | -19.61                     | 0.17  | -18.07                     | 0.14  |
| CHE                     | TEAN        | -17.47                     | 0.0   | -20.03                     | 0.84  | -16.84                     | 0.79  | -16.44                     | 0.26  | -20.83                     | 0.23  | -18.68                     | 0.20  |
| CHE                     | TOL         | -17.46                     | 0.01  | -20.15                     | 0.75  | -17.34                     | 0.88  | -15.57                     | 0.23  | -20.32                     | 0.23  | -18.16                     | 0.20  |
| CHE                     | BZN         | -17.36                     | 0.33  | -19.88                     | 0.84  | -17.54                     | 0.87  | -16.08                     | 0.23  | -18.89                     | 0.15  | -18.18                     | 0.23  |
| CHE                     | HPE         | -17.53                     | 0.0   | -19.99                     | 0.71  | -16.76                     | 0.68  | -16.37                     | 0.13  | -20.51                     | 0.25  | -18.57                     | 0.17  |
| CHE                     | HXE         | -17.7                      | 0.0   | -20.19                     | 0.61  | -16.98                     | 0.67  | -16.56                     | 0.14  | -20.59                     | 0.15  | -18.61                     | 0.12  |
| CHE                     | CCL4        | -18.5                      | 0.08  | -20.80                     | 1.17  | -16.81                     | 1.14  | -                          | -     | -22.84                     | 0.21  | -21.54                     | 0.26  |
| CHE                     | CHE         | -18.55                     | 0.01  | -21.03                     | 0.77  | -16.92                     | 0.68  | -17.05                     | 0.31  | -21.75                     | 0.20  | -20.03                     | 0.26  |

Table S.2: Numerical values of the electrostatic (ELE) and van der Waals (VDW) contributions to the calculated cross-solvation free energies  $\Delta_s G_{A:B}^\ominus$ . The results are reported for the the five force fields newly considered in this work (Main Article Tab. 1). The molecules considered and their acronyms are shown in Main Article Fig. 1. This data is displayed graphically in Figs. S.2 and S.3.

| Solute (A)              | Solvent (B) | GROMOS-54A7 |        | GROMOS-ATB |        | OPLS-LBCC |        | AMBER-GAFF2 |        | OpenFF |        |
|-------------------------|-------------|-------------|--------|------------|--------|-----------|--------|-------------|--------|--------|--------|
|                         |             | ELE         | VDW    | ELE        | VDW    | ELE       | VDW    | ELE         | VDW    | ELE    | VDW    |
| [kJ·mol <sup>-1</sup> ] |             |             |        |            |        |           |        |             |        |        |        |
| DAMD                    | DAMD        | -           | -      | -17.28     | -22.85 | -21.35    | -12.45 | -12.97      | -15.64 | -16.99 | -13.38 |
| DAMD                    | PPN         | -           | -      | -14.87     | -23.62 | -18.05    | -15.28 | -12.58      | -16.06 | -15.37 | -15.29 |
| DAMD                    | BTN         | -           | -      | -14.40     | -22.82 | -16.71    | -15.87 | -11.60      | -16.64 | -13.98 | -15.86 |
| DAMD                    | PYRI        | -           | -      | -11.71     | -27.10 | -20.45    | -13.76 | -13.12      | -16.50 | -15.50 | -16.16 |
| DAMD                    | H2O         | -           | -      | -34.26     | -0.53  | -40.00    | 5.38   | -30.26      | 5.30   | -37.62 | 6.00   |
| DAMD                    | C2CL2       | -           | -      | -15.34     | -22.80 | -22.72    | -13.61 | -12.14      | -18.11 | -15.47 | -17.70 |
| DAMD                    | EAE         | -           | -      | -11.87     | -25.80 | -16.34    | -16.16 | -11.16      | -16.49 | -14.02 | -16.48 |
| DAMD                    | PTL         | -           | -      | -14.68     | -22.27 | -15.61    | -16.24 | -14.33      | -16.50 | -19.92 | -15.84 |
| DAMD                    | MTL         | -           | -      | -18.54     | -20.24 | -24.17    | -10.40 | -18.77      | -12.57 | -25.92 | -14.29 |
| DAMD                    | ETL         | -           | -      | -16.65     | -21.76 | -20.22    | -13.26 | -17.24      | -15.37 | -23.08 | -15.08 |
| DAMD                    | BTL         | -           | -      | -12.98     | -23.12 | -16.51    | -15.54 | -13.67      | -16.13 | -21.11 | -16.55 |
| DAMD                    | 2M2P        | -           | -      | -14.81     | -26.97 | -15.78    | -16.12 | -13.88      | -17.12 | -19.99 | -16.33 |
| DAMD                    | 1PL         | -           | -      | -15.79     | -22.51 | -17.52    | -14.99 | -15.35      | -15.95 | -21.66 | -16.06 |
| DAMD                    | 2PL         | -           | -      | -14.72     | -24.91 | -17.04    | -15.20 | -14.97      | -15.87 | -21.40 | -15.86 |
| DAMD                    | ANLN        | -           | -      | -20.37     | -25.64 | -23.76    | -12.64 | -21.81      | -12.30 | -24.35 | -11.91 |
| DAMD                    | DEE         | -           | -      | -8.87      | -25.57 | -10.64    | -17.71 | -5.97       | -18.60 | -7.52  | -18.15 |
| DAMD                    | CHCL3       | -           | -      | -18.01     | -26.29 | -22.94    | -18.57 | -14.50      | -20.42 | -16.12 | -19.66 |
| DAMD                    | DEAN        | -           | -      | -6.97      | -26.22 | -11.83    | -18.09 | -10.85      | -18.49 | -10.56 | -17.83 |
| DAMD                    | TEAN        | -           | -      | -1.44      | -26.36 | -6.38     | -19.06 | -1.95       | -19.27 | -6.27  | -18.04 |
| DAMD                    | TOL         | -           | -      | -7.19      | -25.65 | -12.38    | -17.76 | -7.15       | -19.19 | -8.94  | -17.72 |
| DAMD                    | BZN         | -           | -      | -9.56      | -26.21 | -12.67    | -17.59 | -10.04      | -17.89 | -9.88  | -17.91 |
| DAMD                    | HPE         | -           | -      | -0.10      | -24.68 | -0.66     | -18.56 | -0.11       | -18.63 | -0.04  | -18.19 |
| DAMD                    | HXE         | -           | -      | -0.06      | -24.63 | -0.63     | -18.66 | -0.09       | -19.11 | -0.05  | -18.29 |
| DAMD                    | CCL4        | -           | -      | -0.68      | -26.43 | -         | -      | -0.42       | -21.23 | -0.57  | -20.84 |
| DAMD                    | CHE         | -           | -      | -0.00      | -24.26 | -0.71     | -19.66 | -0.03       | -19.58 | -0.05  | -18.82 |
| PPN                     | DAMD        | -           | -      | -12.48     | -6.65  | -15.08    | -3.32  | -10.35      | -6.45  | -12.10 | -4.87  |
| PPN                     | PPN         | -6.57       | -12.10 | -9.42      | -9.95  | -12.84    | -6.82  | -9.90       | -7.56  | -10.64 | -7.47  |
| PPN                     | BTN         | -5.71       | -12.37 | -10.07     | -9.15  | -11.89    | -7.19  | -9.13       | -7.95  | -9.82  | -7.56  |
| PPN                     | PYRI        | -           | -      | -6.45      | -12.04 | -14.25    | -4.76  | -10.02      | -7.24  | -10.50 | -7.41  |
| PPN                     | H2O         | -14.88      | 4.81   | -21.58     | 7.48   | -23.89    | 7.64   | -21.71      | 8.18   | -22.70 | 8.42   |
| PPN                     | C2CL2       | -           | -      | -11.09     | -8.55  | -15.88    | -5.16  | -9.16       | -8.94  | -10.04 | -8.78  |
| PPN                     | EAE         | -6.96       | -11.18 | -7.09      | -11.47 | -11.57    | -6.99  | -8.82       | -7.99  | -9.79  | -7.08  |
| PPN                     | PTL         | -3.37       | -10.91 | -7.64      | -9.91  | -10.23    | -7.10  | -6.65       | -7.29  | -10.66 | -7.73  |
| PPN                     | MTL         | -7.31       | -8.38  | -10.02     | -8.90  | -15.92    | -3.26  | -12.08      | -5.81  | -14.47 | -6.90  |
| PPN                     | ETL         | -5.51       | -9.93  | -8.13      | -9.62  | -13.55    | -5.45  | -10.59      | -7.32  | -12.85 | -7.41  |
| PPN                     | BTL         | -3.89       | -10.68 | -6.75      | -9.27  | -11.08    | -7.04  | -7.73       | -7.88  | -10.75 | -7.65  |
| PPN                     | 2M2P        | -4.04       | -11.40 | -10.84     | -7.33  | -10.91    | -7.21  | -8.92       | -7.44  | -11.05 | -7.92  |
| PPN                     | 1PL         | -4.82       | -11.07 | -8.54      | -8.83  | -12.21    | -6.77  | -9.36       | -7.23  | -11.66 | -7.47  |
| PPN                     | 2PL         | -4.12       | -11.35 | -7.09      | -10.23 | -11.68    | -6.57  | -9.30       | -7.38  | -11.72 | -7.66  |
| PPN                     | ANLN        | -9.67       | -9.25  | -12.61     | -10.88 | -16.49    | -4.10  | -16.54      | -3.52  | -15.41 | -4.61  |
| PPN                     | DEE         | -2.28       | -13.19 | -5.51      | -11.97 | -7.81     | -9.46  | -4.46       | -10.01 | -5.07  | -9.71  |
| PPN                     | CHCL3       | -3.80       | -14.31 | -10.84     | -10.69 | -16.61    | -8.87  | -9.92       | -10.51 | -9.93  | -10.68 |
| PPN                     | DEAN        | -6.28       | -11.40 | -4.09      | -12.70 | -8.77     | -9.13  | -7.70       | -9.40  | -7.31  | -9.24  |
| PPN                     | TEAN        | -1.93       | -13.20 | -1.04      | -11.32 | -4.56     | -9.52  | -1.34       | -9.72  | -4.17  | -9.33  |
| PPN                     | TOL         | -3.96       | -12.70 | -4.83      | -10.92 | -9.04     | -8.35  | -5.58       | -9.45  | -6.23  | -9.33  |

Table S.2 – Continued on next page

Table S.2 – Continued from previous page

| Solute (A)              | Solvent (B) | GROMOS-54A7 |        | GROMOS-ATB |        | OPLS-LBCC |        | AMBER-GAFF2 |        | OpenFF |        |
|-------------------------|-------------|-------------|--------|------------|--------|-----------|--------|-------------|--------|--------|--------|
|                         |             | ELE         | VDW    | ELE        | VDW    | ELE       | VDW    | ELE         | VDW    | ELE    | VDW    |
| [kJ·mol <sup>-1</sup> ] |             |             |        |            |        |           |        |             |        |        |        |
| PPN                     | BZN         | -5.21       | -11.91 | -5.78      | -11.74 | -9.02     | -8.63  | -7.77       | -8.62  | -6.84  | -9.16  |
| PPN                     | HPE         | -0.00       | -12.77 | -0.07      | -10.97 | -0.39     | -9.85  | -0.07       | -9.45  | -0.02  | -9.49  |
| PPN                     | HXE         | -0.00       | -13.11 | -0.04      | -10.92 | -0.37     | -9.88  | -0.07       | -10.11 | -0.01  | -9.95  |
| PPN                     | CCL4        | -0.00       | -13.84 | 0.56       | -11.71 | -         | -      | -0.24       | -11.22 | -0.43  | -11.08 |
| PPN                     | CHE         | -0.00       | -13.50 | -0.00      | -11.50 | -0.38     | -10.21 | -0.03       | -9.62  | 0.02   | -9.70  |
| BTN                     | DAMD        | -           | -      | -10.95     | -7.68  | -14.55    | -5.27  | -9.97       | -10.12 | -11.48 | -7.57  |
| BTN                     | PPN         | -6.14       | -14.81 | -9.03      | -12.02 | -12.29    | -9.25  | -9.61       | -10.77 | -10.21 | -10.13 |
| BTN                     | BTN         | -5.46       | -15.03 | -9.14      | -11.16 | -11.40    | -9.59  | -8.82       | -11.37 | -9.33  | -10.65 |
| BTN                     | PYRI        | -           | -      | -4.40      | -16.22 | -13.84    | -6.70  | -9.74       | -10.83 | -10.22 | -9.95  |
| BTN                     | H2O         | -14.75      | 5.38   | -19.68     | 8.25   | -23.78    | 8.24   | -21.62      | 8.32   | -22.72 | 8.96   |
| BTN                     | C2CL2       | -           | -      | -10.78     | -11.10 | -15.37    | -7.33  | -8.78       | -12.66 | -9.84  | -12.05 |
| BTN                     | EAE         | -6.53       | -14.13 | -5.81      | -13.91 | -11.02    | -9.61  | -8.55       | -11.20 | -9.33  | -10.36 |
| BTN                     | PTL         | -3.66       | -13.81 | -6.27      | -12.27 | -9.73     | -9.93  | -7.27       | -10.93 | -10.41 | -11.01 |
| BTN                     | MTL         | -6.85       | -10.77 | -8.51      | -10.89 | -15.53    | -5.11  | -12.08      | -8.49  | -14.39 | -9.42  |
| BTN                     | ETL         | -5.20       | -12.22 | -7.17      | -11.76 | -12.90    | -7.89  | -10.79      | -10.17 | -12.53 | -10.02 |
| BTN                     | BTL         | -3.14       | -14.40 | -5.10      | -11.77 | -10.73    | -9.88  | -7.50       | -10.27 | -10.89 | -10.89 |
| BTN                     | 2M2P        | -3.93       | -14.47 | -10.19     | -10.21 | -10.41    | -10.07 | -8.93       | -11.36 | -10.96 | -11.38 |
| BTN                     | 1PL         | -4.48       | -12.66 | -7.00      | -11.70 | -11.77    | -9.06  | -8.92       | -10.15 | -11.73 | -10.87 |
| BTN                     | 2PL         | -4.52       | -12.93 | -5.33      | -11.60 | -10.79    | -9.11  | -8.68       | -10.50 | -11.48 | -10.75 |
| BTN                     | ANLN        | -8.98       | -9.44  | -10.63     | -13.72 | -15.83    | -6.40  | -15.63      | -6.46  | -14.76 | -7.41  |
| BTN                     | DEE         | -2.15       | -16.42 | -4.43      | -14.52 | -7.29     | -12.18 | -4.21       | -13.76 | -4.94  | -13.03 |
| BTN                     | CHCL3       | -3.78       | -17.52 | -9.66      | -13.36 | -16.24    | -11.90 | -9.82       | -14.71 | -9.74  | -14.11 |
| BTN                     | DEAN        | -5.87       | -14.17 | -3.39      | -15.53 | -8.02     | -12.14 | -7.37       | -13.03 | -6.78  | -11.84 |
| BTN                     | TEAN        | -1.77       | -15.65 | -1.07      | -13.48 | -4.19     | -12.47 | -1.26       | -13.18 | -3.95  | -12.60 |
| BTN                     | TOL         | -3.68       | -15.64 | -4.20      | -14.84 | -8.43     | -10.81 | -5.26       | -13.25 | -6.00  | -12.74 |
| BTN                     | BZN         | -4.82       | -15.13 | -4.57      | -15.25 | -8.66     | -11.37 | -7.27       | -12.34 | -6.60  | -12.56 |
| BTN                     | HPE         | -0.00       | -15.99 | -0.07      | -13.44 | -0.40     | -12.55 | -0.05       | -13.12 | -0.06  | -13.00 |
| BTN                     | HXE         | -0.00       | -15.63 | -0.04      | -14.30 | -0.39     | -12.95 | -0.07       | -13.61 | -0.04  | -13.09 |
| BTN                     | CCL4        | -0.00       | -16.71 | 1.46       | -16.03 | -         | -      | -0.24       | -15.30 | -0.38  | -14.83 |
| BTN                     | CHE         | -0.00       | -16.44 | -0.00      | -14.14 | -0.38     | -13.50 | -0.03       | -13.99 | -0.03  | -13.48 |
| PYRI                    | DAMD        | -           | -      | -6.10      | -19.24 | -15.85    | -12.46 | -9.70       | -12.02 | -10.75 | -11.98 |
| PYRI                    | PPN         | -           | -      | -4.45      | -20.17 | -12.74    | -14.40 | -8.79       | -13.08 | -8.95  | -13.44 |
| PYRI                    | BTN         | -           | -      | -3.36      | -21.49 | -11.83    | -15.28 | -8.03       | -13.38 | -8.20  | -14.06 |
| PYRI                    | PYRI        | -           | -      | -3.76      | -21.28 | -14.70    | -12.67 | -8.82       | -12.42 | -8.54  | -13.96 |
| PYRI                    | H2O         | -           | -      | -17.48     | -0.66  | -22.63    | 3.61   | -17.59      | 5.67   | -18.95 | 4.90   |
| PYRI                    | C2CL2       | -           | -      | -3.53      | -21.08 | -15.72    | -12.76 | -8.05       | -14.09 | -7.91  | -15.07 |
| PYRI                    | EAE         | -           | -      | -3.78      | -21.20 | -11.34    | -15.11 | -8.14       | -13.03 | -8.28  | -14.35 |
| PYRI                    | PTL         | -           | -      | -3.91      | -18.96 | -8.75     | -15.44 | -5.19       | -13.16 | -7.93  | -14.63 |
| PYRI                    | MTL         | -           | -      | -4.17      | -18.81 | -15.44    | -9.71  | -9.06       | -10.25 | -11.17 | -12.68 |
| PYRI                    | ETL         | -           | -      | -3.64      | -18.97 | -12.49    | -13.06 | -7.42       | -12.51 | -9.63  | -13.49 |
| PYRI                    | BTL         | -           | -      | -1.67      | -20.53 | -9.74     | -14.52 | -5.50       | -12.85 | -7.75  | -14.33 |
| PYRI                    | 2M2P        | -           | -      | -3.70      | -19.91 | -9.60     | -15.87 | -5.69       | -13.70 | -8.23  | -14.15 |
| PYRI                    | 1PL         | -           | -      | -3.78      | -19.07 | -11.11    | -14.29 | -6.40       | -12.71 | -8.72  | -14.13 |
| PYRI                    | 2PL         | -           | -      | -2.09      | -21.77 | -10.54    | -14.68 | -5.56       | -12.40 | -8.73  | -14.48 |
| PYRI                    | ANLN        | -           | -      | -5.13      | -18.84 | -15.80    | -12.85 | -12.72      | -9.55  | -13.13 | -9.96  |
| PYRI                    | DEE         | -           | -      | -3.98      | -20.28 | -7.67     | -16.85 | -3.65       | -15.36 | -4.25  | -16.36 |
| PYRI                    | CHCL3       | -           | -      | -7.45      | -19.91 | -15.12    | -16.31 | -7.69       | -16.02 | -7.55  | -17.19 |
| PYRI                    | DEAN        | -           | -      | -1.72      | -21.29 | -8.16     | -16.84 | -5.77       | -14.98 | -5.90  | -15.87 |
| PYRI                    | TEAN        | -           | -      | -0.33      | -21.18 | -4.59     | -18.06 | -1.19       | -15.68 | -3.64  | -16.06 |
| PYRI                    | TOL         | -           | -      | -4.47      | -19.14 | -8.97     | -16.53 | -4.56       | -15.03 | -5.11  | -15.49 |

Table S.2 – Continued on next page

Table S.2 – Continued from previous page

| Solute (A)              | Solvent (B) | GROMOS-54A7 |      | GROMOS-ATB |        | OPLS-LBCC |        | AMBER-GAFF2 |        | OpenFF |        |
|-------------------------|-------------|-------------|------|------------|--------|-----------|--------|-------------|--------|--------|--------|
|                         |             | ELE         | VDW  | ELE        | VDW    | ELE       | VDW    | ELE         | VDW    | ELE    | VDW    |
| [kJ·mol <sup>-1</sup> ] |             |             |      |            |        |           |        |             |        |        |        |
| PYRI                    | BZN         | -           | -    | -7.40      | -17.64 | -9.31     | -16.41 | -6.91       | -14.50 | -5.79  | -15.54 |
| PYRI                    | HPE         | -           | -    | -0.02      | -20.08 | -0.46     | -17.78 | -0.08       | -15.28 | 0.03   | -16.22 |
| PYRI                    | HXE         | -           | -    | -0.02      | -19.64 | -0.44     | -17.87 | -0.08       | -15.46 | 0.00   | -16.14 |
| PYRI                    | CCL4        | -           | -    | -1.48      | -19.99 | -         | -      | -0.32       | -16.79 | -0.32  | -17.81 |
| PYRI                    | CHE         | -           | -    | -0.00      | -19.41 | -0.55     | -18.93 | 0.00        | -15.65 | -0.07  | -16.83 |
| H2O                     | DAMD        | -           | -    | -26.19     | 6.75   | -26.49    | 7.81   | -26.54      | 6.36   | -30.10 | 6.91   |
| H2O                     | PPN         | -16.60      | 4.31 | -19.59     | 4.26   | -22.03    | 4.84   | -21.35      | 4.40   | -21.84 | 4.44   |
| H2O                     | BTN         | -15.31      | 4.23 | -17.36     | 3.74   | -20.95    | 4.82   | -20.09      | 4.58   | -20.89 | 4.45   |
| H2O                     | PYRI        | -           | -    | -19.70     | 4.45   | -20.92    | 7.61   | -18.13      | 5.59   | -20.27 | 5.84   |
| H2O                     | H2O         | -35.19      | 8.70 | -35.23     | 8.90   | -35.44    | 9.19   | -35.55      | 9.15   | -35.55 | 9.15   |
| H2O                     | C2CL2       | -           | -    | -11.65     | 3.95   | -17.86    | 6.79   | -11.42      | 4.44   | -10.80 | 4.48   |
| H2O                     | EAE         | -20.43      | 5.61 | -18.46     | 4.77   | -20.02    | 5.35   | -22.47      | 4.93   | -21.82 | 5.59   |
| H2O                     | PTL         | -19.40      | 2.53 | -19.97     | 3.82   | -22.31    | 4.86   | -21.87      | 5.21   | -19.73 | 4.95   |
| H2O                     | MTL         | -27.06      | 4.21 | -24.88     | 3.56   | -29.34    | 5.82   | -26.15      | 3.98   | -24.52 | 4.19   |
| H2O                     | ETL         | -22.62      | 3.88 | -22.84     | 3.70   | -27.26    | 5.26   | -23.80      | 4.34   | -22.68 | 4.55   |
| H2O                     | BTL         | -19.95      | 1.76 | -20.37     | 2.78   | -23.90    | 4.83   | -21.99      | 4.94   | -20.44 | 4.72   |
| H2O                     | 2M2P        | -19.30      | 1.85 | -21.85     | 4.77   | -24.71    | 4.67   | -21.30      | 4.53   | -20.24 | 4.74   |
| H2O                     | 1PL         | -21.19      | 2.68 | -21.07     | 2.65   | -25.45    | 4.89   | -23.91      | 4.95   | -21.58 | 4.73   |
| H2O                     | 2PL         | -20.73      | 3.31 | -22.09     | 5.40   | -24.86    | 4.93   | -22.64      | 4.71   | -21.09 | 4.74   |
| H2O                     | ANLN        | -27.39      | 9.81 | -20.96     | 3.23   | -24.49    | 7.97   | -24.66      | 7.77   | -21.84 | 7.39   |
| H2O                     | DEE         | -4.62       | 2.70 | -10.13     | 2.89   | -16.60    | 3.18   | -8.44       | 3.15   | -10.99 | 3.47   |
| H2O                     | CHCL3       | -4.67       | 3.86 | -10.85     | 5.53   | -14.73    | 5.45   | -9.44       | 3.70   | -8.53  | 3.98   |
| H2O                     | DEAN        | -18.05      | 3.97 | -7.73      | 1.98   | -22.27    | 3.83   | -15.54      | 3.86   | -19.97 | 3.92   |
| H2O                     | TEAN        | -5.02       | 3.55 | -2.14      | 3.93   | -14.65    | 3.96   | -2.94       | 4.20   | -15.00 | 4.01   |
| H2O                     | TOL         | -8.03       | 4.02 | -7.39      | 3.94   | -11.86    | 5.04   | -8.90       | 4.57   | -9.92  | 4.19   |
| H2O                     | BZN         | -11.41      | 4.21 | -9.32      | 4.19   | -11.87    | 5.04   | -12.75      | 4.66   | -10.73 | 4.04   |
| H2O                     | HPE         | -0.00       | 3.06 | -0.05      | 3.05   | -0.56     | 3.13   | -0.06       | 3.94   | -0.05  | 3.51   |
| H2O                     | HXE         | -0.00       | 2.84 | -0.03      | 2.73   | -0.53     | 2.88   | -0.06       | 3.65   | -0.07  | 3.22   |
| H2O                     | CCL4        | -0.00       | 3.73 | -1.56      | 5.06   | -         | -      | -0.51       | 3.86   | -0.43  | 4.24   |
| H2O                     | CHE         | -0.00       | 3.37 | -0.00      | 2.51   | -0.54     | 3.65   | -0.01       | 4.64   | -0.09  | 4.25   |
| C2CL2                   | DAMD        | -           | -    | -9.15      | -7.95  | -18.92    | -7.27  | -8.47       | -10.55 | -9.71  | -9.33  |
| C2CL2                   | PPN         | -           | -    | -6.67      | -11.70 | -15.95    | -10.68 | -7.35       | -11.65 | -7.83  | -10.91 |
| C2CL2                   | BTN         | -           | -    | -7.29      | -10.96 | -14.98    | -11.19 | -6.76       | -12.13 | -7.37  | -11.50 |
| C2CL2                   | PYRI        | -           | -    | -2.31      | -15.16 | -16.81    | -8.45  | -7.18       | -11.05 | -7.27  | -10.78 |
| C2CL2                   | H2O         | -           | -    | -10.66     | 7.20   | -19.75    | 6.68   | -9.73       | 6.91   | -9.24  | 6.84   |
| C2CL2                   | C2CL2       | -           | -    | -7.28      | -10.47 | -16.16    | -8.27  | -5.29       | -12.31 | -5.39  | -12.30 |
| C2CL2                   | EAE         | -           | -    | -3.97      | -13.52 | -13.40    | -10.89 | -6.98       | -11.92 | -7.05  | -10.99 |
| C2CL2                   | PTL         | -           | -    | -3.14      | -11.53 | -11.90    | -11.30 | -3.22       | -12.21 | -4.04  | -11.60 |
| C2CL2                   | MTL         | -           | -    | -4.57      | -10.84 | -17.10    | -6.51  | -5.59       | -8.93  | -6.22  | -10.54 |
| C2CL2                   | ETL         | -           | -    | -3.34      | -11.20 | -15.33    | -9.08  | -4.22       | -10.96 | -5.49  | -11.18 |
| C2CL2                   | BTL         | -           | -    | -2.40      | -12.05 | -12.76    | -11.25 | -3.66       | -11.56 | -4.25  | -11.53 |
| C2CL2                   | 2M2P        | -           | -    | -1.67      | -13.46 | -13.69    | -11.79 | -2.35       | -12.58 | -4.15  | -11.76 |
| C2CL2                   | 1PL         | -           | -    | -3.63      | -11.65 | -14.59    | -10.61 | -4.43       | -10.99 | -4.68  | -11.71 |
| C2CL2                   | 2PL         | -           | -    | -2.66      | -12.15 | -13.93    | -10.94 | -3.64       | -11.34 | -4.65  | -10.77 |
| C2CL2                   | ANLN        | -           | -    | -5.08      | -12.35 | -17.30    | -6.72  | -10.82      | -6.84  | -9.51  | -7.54  |
| C2CL2                   | DEE         | -           | -    | -2.86      | -13.93 | -10.23    | -13.27 | -3.14       | -14.09 | -4.02  | -14.02 |
| C2CL2                   | CHCL3       | -           | -    | -4.37      | -13.66 | -13.44    | -11.99 | -3.54       | -14.06 | -3.99  | -13.73 |
| C2CL2                   | DEAN        | -           | -    | -1.30      | -14.46 | -12.06    | -13.16 | -4.12       | -13.22 | -5.53  | -13.27 |
| C2CL2                   | TEAN        | -           | -    | -0.67      | -13.63 | -6.86     | -13.85 | -1.11       | -14.02 | -3.89  | -13.72 |
| C2CL2                   | TOL         | -           | -    | -3.17      | -13.37 | -10.78    | -12.18 | -4.84       | -13.50 | -4.95  | -12.72 |

Table S.2 – Continued on next page

Table S.2 – Continued from previous page

| Solute (A)              | Solvent (B) | GROMOS-54A7 |        | GROMOS-ATB |        | OPLS-LBCC |        | AMBER-GAFF2 |        | OpenFF |        |
|-------------------------|-------------|-------------|--------|------------|--------|-----------|--------|-------------|--------|--------|--------|
|                         |             | ELE         | VDW    | ELE        | VDW    | ELE       | VDW    | ELE         | VDW    | ELE    | VDW    |
| [kJ·mol <sup>-1</sup> ] |             |             |        |            |        |           |        |             |        |        |        |
| C2CL2                   | BZN         | -           | -      | -3.25      | -14.64 | -10.56    | -12.27 | -6.64       | -12.59 | -5.16  | -13.02 |
| C2CL2                   | HPE         | -           | -      | -0.04      | -13.63 | -0.37     | -14.11 | -0.01       | -14.16 | -0.04  | -13.56 |
| C2CL2                   | HXE         | -           | -      | -0.02      | -13.73 | -0.36     | -14.09 | -0.03       | -14.45 | -0.04  | -13.91 |
| C2CL2                   | CCL4        | -           | -      | 0.85       | -14.82 | -         | -      | -0.26       | -14.42 | -0.16  | -14.45 |
| C2CL2                   | CHE         | -           | -      | -0.00      | -13.50 | -0.27     | -14.50 | 0.00        | -14.46 | -0.03  | -14.58 |
| EAE                     | DAMD        | -           | -      | -8.26      | -14.68 | -13.74    | -8.17  | -9.15       | -11.51 | -10.92 | -12.22 |
| EAE                     | PPN         | -10.03      | -19.19 | -4.94      | -18.12 | -11.15    | -12.06 | -8.53       | -12.76 | -9.26  | -14.30 |
| EAE                     | BTN         | -8.92       | -19.41 | -6.42      | -16.52 | -10.22    | -12.20 | -7.83       | -13.20 | -8.31  | -14.59 |
| EAE                     | PYRI        | -           | -      | -2.19      | -21.68 | -12.88    | -9.09  | -9.26       | -12.17 | -9.38  | -14.89 |
| EAE                     | H2O         | -23.58      | 5.10   | -19.61     | 7.04   | -22.40    | 8.32   | -23.75      | 8.81   | -22.95 | 6.88   |
| EAE                     | C2CL2       | -           | -      | -7.82      | -16.98 | -13.23    | -10.11 | -8.41       | -14.60 | -8.59  | -16.48 |
| EAE                     | EAE         | -10.61      | -18.14 | -4.35      | -18.89 | -10.36    | -12.24 | -7.96       | -12.89 | -8.91  | -14.63 |
| EAE                     | PTL         | -8.42       | -19.45 | -4.80      | -16.56 | -8.70     | -12.79 | -7.70       | -12.95 | -9.58  | -15.21 |
| EAE                     | MTL         | -12.80      | -14.63 | -6.48      | -15.60 | -14.26    | -7.35  | -12.53      | -9.73  | -13.76 | -13.23 |
| EAE                     | ETL         | -10.55      | -15.14 | -5.21      | -16.66 | -11.48    | -10.14 | -10.95      | -11.90 | -12.07 | -13.91 |
| EAE                     | BTL         | -8.48       | -17.53 | -3.38      | -18.73 | -9.11     | -12.41 | -8.82       | -12.50 | -10.13 | -15.30 |
| EAE                     | 2M2P        | -7.81       | -17.69 | -2.43      | -19.62 | -9.57     | -12.65 | -9.91       | -13.05 | -10.45 | -14.65 |
| EAE                     | 1PL         | -8.31       | -16.69 | -5.27      | -17.71 | -10.56    | -11.69 | -9.12       | -12.21 | -11.23 | -14.40 |
| EAE                     | 2PL         | -10.27      | -17.75 | -2.80      | -18.57 | -9.72     | -11.81 | -9.30       | -12.70 | -11.26 | -14.45 |
| EAE                     | ANLN        | -15.28      | -15.28 | -8.61      | -19.88 | -15.73    | -8.85  | -15.50      | -8.14  | -15.46 | -11.08 |
| EAE                     | DEE         | -3.86       | -20.87 | -3.59      | -19.36 | -6.87     | -14.58 | -3.70       | -15.53 | -4.57  | -17.22 |
| EAE                     | CHCL3       | -6.14       | -21.82 | -9.26      | -18.50 | -13.24    | -14.92 | -9.62       | -16.87 | -8.76  | -19.05 |
| EAE                     | DEAN        | -10.47      | -17.99 | -2.78      | -20.13 | -7.56     | -14.76 | -7.55       | -14.92 | -6.47  | -16.67 |
| EAE                     | TEAN        | -3.19       | -20.14 | -0.75      | -19.03 | -4.24     | -15.17 | -1.25       | -15.69 | -3.76  | -16.95 |
| EAE                     | TOL         | -6.31       | -20.21 | -3.67      | -19.21 | -8.61     | -14.03 | -5.13       | -14.99 | -6.03  | -16.79 |
| EAE                     | BZN         | -7.93       | -19.66 | -4.64      | -18.73 | -8.83     | -14.16 | -7.34       | -14.18 | -6.60  | -16.96 |
| EAE                     | HPE         | -0.00       | -20.33 | -0.05      | -17.78 | -0.55     | -15.41 | -0.04       | -15.40 | -0.05  | -17.47 |
| EAE                     | HXE         | -0.00       | -19.81 | -0.03      | -18.26 | -0.53     | -15.63 | -0.05       | -15.58 | -0.05  | -17.38 |
| EAE                     | CCL4        | -0.00       | -21.73 | -0.11      | -19.86 | -         | -      | -0.41       | -17.62 | -0.31  | -19.65 |
| EAE                     | CHE         | -0.00       | -21.04 | -0.00      | -18.69 | -0.55     | -16.71 | -0.01       | -15.98 | -0.06  | -17.76 |
| PTL                     | DAMD        | -           | -      | -13.97     | -10.11 | -16.41    | -7.03  | -18.72      | -12.69 | -17.25 | -12.60 |
| PTL                     | PPN         | -12.81      | -16.25 | -10.11     | -13.70 | -13.24    | -11.22 | -15.21      | -13.66 | -12.27 | -15.12 |
| PTL                     | BTN         | -11.74      | -16.83 | -8.90      | -14.60 | -12.13    | -12.08 | -14.32      | -14.07 | -11.82 | -15.50 |
| PTL                     | PYRI        | -           | -      | -7.32      | -17.11 | -13.82    | -8.98  | -12.93      | -13.79 | -11.09 | -15.76 |
| PTL                     | H2O         | -28.72      | 7.13   | -22.74     | 10.27  | -27.33    | 9.08   | -28.40      | 9.51   | -19.85 | 7.87   |
| PTL                     | C2CL2       | -           | -      | -6.89      | -15.24 | -13.80    | -9.49  | -8.47       | -15.77 | -6.26  | -17.28 |
| PTL                     | EAE         | -15.50      | -14.75 | -8.63      | -15.09 | -11.89    | -11.68 | -15.81      | -14.18 | -11.97 | -14.86 |
| PTL                     | PTL         | -17.60      | -13.44 | -10.92     | -14.78 | -12.71    | -11.41 | -14.85      | -14.11 | -9.99  | -15.29 |
| PTL                     | MTL         | -21.83      | -12.43 | -12.92     | -12.55 | -18.88    | -6.55  | -19.33      | -10.97 | -13.07 | -13.90 |
| PTL                     | ETL         | -19.59      | -14.86 | -11.70     | -13.93 | -15.69    | -9.96  | -17.58      | -13.06 | -11.71 | -14.95 |
| PTL                     | BTL         | -18.04      | -16.36 | -10.90     | -15.40 | -13.06    | -11.85 | -16.73      | -13.72 | -10.42 | -15.98 |
| PTL                     | 2M2P        | -16.43      | -15.56 | -13.77     | -16.88 | -12.89    | -12.52 | -14.90      | -15.21 | -10.90 | -15.43 |
| PTL                     | 1PL         | -18.76      | -14.72 | -11.18     | -14.44 | -13.84    | -11.62 | -17.31      | -13.54 | -10.94 | -15.43 |
| PTL                     | 2PL         | -18.37      | -15.88 | -11.70     | -14.62 | -14.12    | -11.74 | -16.61      | -13.09 | -11.12 | -15.55 |
| PTL                     | ANLN        | -22.56      | -7.62  | -10.21     | -15.08 | -16.40    | -8.23  | -19.19      | -7.93  | -13.00 | -10.17 |
| PTL                     | DEE         | -3.52       | -19.03 | -5.41      | -16.80 | -7.91     | -14.43 | -5.63       | -17.01 | -6.21  | -17.97 |
| PTL                     | CHCL3       | -4.02       | -19.32 | -7.50      | -16.50 | -13.55    | -14.69 | -8.05       | -18.31 | -5.35  | -19.55 |
| PTL                     | DEAN        | -15.83      | -15.44 | -3.18      | -18.04 | -10.40    | -14.54 | -11.06      | -16.20 | -11.88 | -17.59 |
| PTL                     | TEAN        | -3.86       | -18.55 | -0.90      | -17.00 | -5.58     | -15.34 | -1.66       | -16.90 | -9.09  | -17.79 |
| PTL                     | TOL         | -5.99       | -18.20 | -4.38      | -16.96 | -7.64     | -13.98 | -6.25       | -16.54 | -5.65  | -17.62 |

Table S.2 – Continued on next page

Table S.2 – Continued from previous page

| Solute (A)              | Solvent (B) | GROMOS-54A7 |        | GROMOS-ATB |        | OPLS-LBCC |        | AMBER-GAFF2 |        | OpenFF |        |
|-------------------------|-------------|-------------|--------|------------|--------|-----------|--------|-------------|--------|--------|--------|
|                         |             | ELE         | VDW    | ELE        | VDW    | ELE       | VDW    | ELE         | VDW    | ELE    | VDW    |
| [kJ·mol <sup>-1</sup> ] |             |             |        |            |        |           |        |             |        |        |        |
| PTL                     | BZN         | -8.22       | -17.80 | -5.07      | -17.67 | -7.63     | -14.22 | -9.09       | -15.75 | -6.05  | -17.61 |
| PTL                     | HPE         | -0.00       | -18.05 | -0.04      | -16.80 | -0.43     | -15.44 | -0.04       | -16.64 | -0.04  | -18.05 |
| PTL                     | HXE         | -0.00       | -18.56 | -0.02      | -17.11 | -0.41     | -15.81 | -0.04       | -17.20 | -0.06  | -18.32 |
| PTL                     | CCL4        | -0.00       | -19.84 | -0.42      | -17.23 | -         | -      | -0.35       | -19.16 | -0.20  | -21.08 |
| PTL                     | CHE         | -0.00       | -19.73 | -0.00      | -17.08 | -0.42     | -16.07 | -0.01       | -16.29 | -0.12  | -18.58 |
| MTL                     | DAMD        | -           | -      | -15.51     | 0.45   | -17.71    | 2.31   | -19.34      | 1.95   | -18.06 | -0.50  |
| MTL                     | PPN         | -13.72      | -3.71  | -11.31     | -2.06  | -14.39    | -0.71  | -15.67      | 0.18   | -12.84 | -2.54  |
| MTL                     | BTN         | -12.60      | -3.93  | -10.02     | -2.71  | -13.46    | -0.80  | -14.94      | 0.20   | -12.36 | -2.60  |
| MTL                     | PYRI        | -           | -      | -8.74      | -3.74  | -15.00    | 1.93   | -13.38      | 1.23   | -11.73 | -1.83  |
| MTL                     | H2O         | -29.67      | 7.09   | -23.17     | 8.26   | -27.61    | 7.94   | -26.52      | 9.16   | -19.52 | 6.60   |
| MTL                     | C2CL2       | -           | -      | -7.45      | -2.71  | -14.46    | 1.12   | -8.58       | -0.37  | -6.55  | -3.11  |
| MTL                     | EAE         | -16.66      | -2.62  | -10.24     | -2.31  | -12.85    | -0.55  | -16.32      | 0.23   | -12.62 | -2.05  |
| MTL                     | PTL         | -19.11      | -4.01  | -11.57     | -2.09  | -13.84    | -0.91  | -15.45      | 0.60   | -9.69  | -2.35  |
| MTL                     | MTL         | -22.96      | -3.13  | -13.79     | -2.86  | -19.82    | 1.43   | -18.58      | 0.58   | -13.07 | -2.29  |
| MTL                     | ETL         | -20.74      | -4.16  | -12.82     | -2.41  | -17.75    | 0.25   | -17.14      | 0.15   | -12.04 | -2.32  |
| MTL                     | BTL         | -19.29      | -5.42  | -11.72     | -2.26  | -14.82    | -1.01  | -16.24      | 0.56   | -10.68 | -2.57  |
| MTL                     | 2M2P        | -18.50      | -3.68  | -13.94     | -2.46  | -15.03    | -0.91  | -15.62      | 0.39   | -11.38 | -2.31  |
| MTL                     | 1PL         | -21.09      | -1.97  | -12.33     | -2.78  | -16.06    | -0.46  | -17.71      | 0.58   | -11.11 | -2.59  |
| MTL                     | 2PL         | -19.61      | -5.17  | -12.28     | -2.57  | -15.67    | -0.63  | -17.44      | 0.57   | -11.65 | -2.34  |
| MTL                     | ANLN        | -22.46      | -2.81  | -11.38     | -2.97  | -17.95    | 1.95   | -19.35      | 2.90   | -13.84 | 0.15   |
| MTL                     | DEE         | -3.98       | -5.01  | -6.47      | -3.12  | -9.63     | -2.59  | -6.17       | -1.59  | -6.73  | -3.99  |
| MTL                     | CHCL3       | -4.42       | -4.88  | -7.97      | -2.14  | -13.99    | -1.41  | -7.53       | -1.58  | -5.51  | -4.24  |
| MTL                     | DEAN        | -17.91      | -4.29  | -3.83      | -4.21  | -12.75    | -2.24  | -12.10      | -0.91  | -13.10 | -3.56  |
| MTL                     | TEAN        | -4.66       | -4.61  | -1.05      | -2.52  | -7.36     | -2.40  | -1.93       | -0.78  | -10.18 | -3.40  |
| MTL                     | TOL         | -6.73       | -4.78  | -4.99      | -2.63  | -8.65     | -1.25  | -6.67       | -0.53  | -6.08  | -3.39  |
| MTL                     | BZN         | -9.41       | -4.11  | -6.07      | -2.84  | -8.59     | -1.51  | -9.72       | -0.04  | -6.52  | -3.58  |
| MTL                     | HPE         | -0.00       | -4.55  | -0.03      | -2.93  | -0.42     | -2.98  | -0.05       | -0.89  | -0.03  | -3.82  |
| MTL                     | HXE         | -0.00       | -4.87  | -0.02      | -3.15  | -0.39     | -3.19  | -0.05       | -1.18  | -0.04  | -4.08  |
| MTL                     | CCL4        | -0.00       | -5.06  | -0.93      | -2.49  | -         | -      | -0.38       | -1.64  | -0.25  | -4.37  |
| MTL                     | CHE         | -0.00       | -5.05  | -0.00      | -3.03  | -0.41     | -2.81  | -0.01       | -0.35  | -0.06  | -3.75  |
| ETL                     | DAMD        | -           | -      | -15.68     | -1.73  | -17.36    | -0.41  | -18.11      | -1.89  | -17.62 | -3.88  |
| ETL                     | PPN         | -13.01      | -6.87  | -11.27     | -5.49  | -14.11    | -3.56  | -14.60      | -3.71  | -12.53 | -5.82  |
| ETL                     | BTN         | -12.00      | -6.88  | -10.11     | -5.86  | -13.13    | -3.83  | -13.88      | -3.85  | -11.99 | -6.05  |
| ETL                     | PYRI        | -           | -      | -9.07      | -7.04  | -14.71    | -0.83  | -12.28      | -2.74  | -11.44 | -5.83  |
| ETL                     | H2O         | -29.19      | 7.43   | -24.59     | 8.07   | -28.64    | 8.35   | -24.72      | 9.08   | -20.06 | 7.13   |
| ETL                     | C2CL2       | -           | -      | -7.11      | -5.52  | -14.52    | -1.61  | -7.71       | -4.54  | -6.37  | -6.69  |
| ETL                     | EAE         | -15.88      | -5.64  | -10.61     | -5.40  | -12.69    | -3.55  | -15.29      | -3.77  | -12.17 | -5.29  |
| ETL                     | PTL         | -17.64      | -7.78  | -12.43     | -5.99  | -13.69    | -3.78  | -14.26      | -3.44  | -10.11 | -5.86  |
| ETL                     | MTL         | -22.21      | -4.54  | -14.57     | -6.03  | -20.27    | -0.90  | -17.11      | -2.57  | -13.15 | -5.33  |
| ETL                     | ETL         | -20.59      | -5.90  | -14.19     | -5.53  | -17.39    | -2.63  | -15.66      | -3.62  | -12.17 | -5.80  |
| ETL                     | BTL         | -18.51      | -4.78  | -11.84     | -8.01  | -14.69    | -3.88  | -15.09      | -3.36  | -10.65 | -6.17  |
| ETL                     | 2M2P        | -16.58      | -6.74  | -17.69     | -6.07  | -14.84    | -3.92  | -14.92      | -3.71  | -11.01 | -5.97  |
| ETL                     | 1PL         | -18.71      | -7.88  | -13.43     | -5.25  | -15.59    | -3.37  | -15.93      | -2.91  | -10.96 | -5.69  |
| ETL                     | 2PL         | -17.69      | -8.02  | -13.79     | -5.56  | -15.58    | -3.43  | -14.83      | -3.33  | -11.24 | -5.96  |
| ETL                     | ANLN        | -24.28      | -1.09  | -11.09     | -6.00  | -17.92    | -0.91  | -17.68      | 0.58   | -13.83 | -3.99  |
| ETL                     | DEE         | -3.68       | -8.36  | -6.60      | -6.67  | -9.15     | -5.82  | -5.51       | -5.96  | -6.27  | -7.78  |
| ETL                     | CHCL3       | -4.16       | -8.31  | -7.94      | -5.24  | -14.16    | -4.74  | -6.87       | -6.18  | -5.44  | -8.09  |
| ETL                     | DEAN        | -16.02      | -6.64  | -3.88      | -7.46  | -11.99    | -5.35  | -10.59      | -4.92  | -12.14 | -6.89  |
| ETL                     | TEAN        | -4.02       | -7.63  | -1.02      | -6.09  | -7.07     | -5.60  | -1.63       | -5.20  | -9.33  | -7.43  |
| ETL                     | TOL         | -6.11       | -7.67  | -4.81      | -6.33  | -8.36     | -4.75  | -6.01       | -4.83  | -5.70  | -7.22  |

Table S.2 – Continued on next page



Table S.2 – Continued from previous page

| Solute (A)              | Solvent (B) | GROMOS-54A7 |        | GROMOS-ATB |        | OPLS-LBCC |        | AMBER-GAFF2 |        | OpenFF |        |
|-------------------------|-------------|-------------|--------|------------|--------|-----------|--------|-------------|--------|--------|--------|
|                         |             | ELE         | VDW    | ELE        | VDW    | ELE       | VDW    | ELE         | VDW    | ELE    | VDW    |
| [kJ·mol <sup>-1</sup> ] |             |             |        |            |        |           |        |             |        |        |        |
| ETL                     | BZN         | -8.52       | -7.62  | -6.12      | -6.20  | -8.32     | -5.00  | -8.68       | -4.20  | -6.15  | -6.96  |
| ETL                     | HPE         | -0.00       | -7.94  | -0.04      | -6.08  | -0.43     | -6.29  | -0.04       | -5.23  | -0.02  | -7.54  |
| ETL                     | HXE         | -0.00       | -7.99  | -0.02      | -6.66  | -0.41     | -6.42  | -0.04       | -5.68  | -0.04  | -7.83  |
| ETL                     | CCL4        | -0.00       | -8.66  | -0.81      | -5.86  | -         | -      | -0.33       | -6.29  | -0.23  | -8.78  |
| ETL                     | CHE         | -0.00       | -7.92  | -0.00      | -6.54  | -0.42     | -6.19  | -0.01       | -5.06  | -0.07  | -7.66  |
| BTL                     | DAMD        | -           | -      | -16.83     | -7.94  | -16.17    | -4.53  | -19.13      | -8.84  | -17.09 | -9.87  |
| BTL                     | PPN         | -12.77      | -13.29 | -12.50     | -11.00 | -13.06    | -8.66  | -15.55      | -10.47 | -12.20 | -11.95 |
| BTL                     | BTN         | -11.66      | -13.72 | -11.46     | -11.96 | -12.08    | -9.01  | -14.70      | -11.08 | -11.78 | -12.22 |
| BTL                     | PYRI        | -           | -      | -9.07      | -15.01 | -13.77    | -6.02  | -13.26      | -10.38 | -11.04 | -11.90 |
| BTL                     | H2O         | -28.76      | 7.02   | -27.99     | 9.41   | -27.20    | 8.92   | -29.23      | 9.09   | -19.65 | 7.40   |
| BTL                     | C2CL2       | -           | -      | -8.32      | -12.11 | -13.59    | -7.06  | -8.59       | -11.95 | -6.18  | -13.75 |
| BTL                     | EAE         | -15.40      | -11.83 | -10.94     | -12.08 | -11.70    | -9.07  | -16.17      | -10.79 | -11.92 | -12.25 |
| BTL                     | PTL         | -17.18      | -12.27 | -14.64     | -11.87 | -12.21    | -9.27  | -17.87      | -10.68 | -9.88  | -12.39 |
| BTL                     | MTL         | -22.04      | -9.96  | -17.13     | -10.61 | -18.64    | -4.73  | -19.93      | -8.13  | -12.99 | -10.87 |
| BTL                     | ETL         | -19.73      | -12.03 | -16.69     | -11.24 | -15.82    | -7.03  | -18.53      | -9.38  | -11.45 | -11.92 |
| BTL                     | BTL         | -17.42      | -14.40 | -16.75     | -11.12 | -13.08    | -8.92  | -17.75      | -10.40 | -10.21 | -12.75 |
| BTL                     | 2M2P        | -16.84      | -12.15 | -18.35     | -9.13  | -12.90    | -9.86  | -17.07      | -10.97 | -10.68 | -12.39 |
| BTL                     | 1PL         | -18.16      | -12.83 | -15.44     | -12.28 | -14.30    | -8.57  | -17.78      | -9.88  | -10.76 | -12.37 |
| BTL                     | 2PL         | -18.43      | -12.61 | -17.99     | -12.13 | -13.61    | -8.36  | -17.16      | -10.34 | -11.04 | -11.81 |
| BTL                     | ANLN        | -21.05      | -11.79 | -11.43     | -12.52 | -16.08    | -6.08  | -20.59      | -5.13  | -12.49 | -7.67  |
| BTL                     | DEE         | -3.52       | -15.19 | -6.85      | -14.12 | -8.09     | -11.72 | -5.84       | -13.21 | -6.10  | -14.83 |
| BTL                     | CHCL3       | -4.04       | -16.29 | -8.45      | -12.59 | -13.49    | -11.53 | -8.15       | -14.33 | -5.39  | -16.37 |
| BTL                     | DEAN        | -15.75      | -13.99 | -4.05      | -15.19 | -10.18    | -11.61 | -11.60      | -13.10 | -11.79 | -14.00 |
| BTL                     | TEAN        | -3.75       | -14.86 | -1.19      | -13.44 | -5.57     | -12.09 | -1.77       | -12.89 | -9.13  | -14.34 |
| BTL                     | TOL         | -5.92       | -14.49 | -5.11      | -14.12 | -7.63     | -10.95 | -6.46       | -12.63 | -5.50  | -14.21 |
| BTL                     | BZN         | -8.28       | -14.76 | -5.66      | -14.63 | -7.66     | -11.24 | -9.27       | -11.72 | -5.90  | -13.85 |
| BTL                     | HPE         | -0.00       | -14.53 | -0.05      | -13.55 | -0.42     | -12.80 | -0.04       | -13.10 | 0.00   | -14.72 |
| BTL                     | HXE         | -0.00       | -15.00 | -0.02      | -13.47 | -0.40     | -12.73 | -0.05       | -13.34 | -0.02  | -15.02 |
| BTL                     | CCL4        | -0.00       | -15.55 | -0.30      | -13.76 | -         | -      | -0.37       | -15.08 | -0.24  | -16.89 |
| BTL                     | CHE         | -0.00       | -15.55 | -0.00      | -13.65 | -0.41     | -12.64 | -0.01       | -13.00 | -0.05  | -15.21 |
| 2M2P                    | DAMD        | -           | -      | -15.72     | -13.17 | -14.82    | -4.22  | -17.10      | -8.45  | -16.18 | -8.73  |
| 2M2P                    | PPN         | -10.17      | -9.42  | -11.36     | -15.06 | -12.19    | -8.50  | -13.82      | -10.20 | -11.75 | -11.24 |
| 2M2P                    | BTN         | -9.27       | -9.41  | -11.36     | -14.53 | -11.17    | -8.74  | -12.96      | -10.68 | -11.27 | -11.45 |
| 2M2P                    | PYRI        | -           | -      | -6.87      | -19.29 | -13.08    | -6.01  | -11.44      | -9.28  | -10.66 | -10.86 |
| 2M2P                    | H2O         | -23.66      | 10.79  | -27.55     | 5.81   | -28.52    | 8.91   | -25.38      | 8.99   | -20.36 | 7.54   |
| 2M2P                    | C2CL2       | -           | -      | -9.18      | -13.61 | -13.37    | -6.56  | -7.52       | -11.54 | -6.14  | -13.29 |
| 2M2P                    | EAE         | -12.50      | -6.56  | -8.99      | -17.16 | -10.96    | -9.04  | -14.36      | -10.54 | -11.50 | -11.07 |
| 2M2P                    | PTL         | -11.97      | -9.78  | -14.44     | -16.37 | -11.70    | -9.09  | -13.99      | -10.35 | -9.87  | -11.27 |
| 2M2P                    | MTL         | -16.67      | -5.97  | -16.14     | -14.03 | -18.26    | -4.50  | -16.85      | -7.75  | -13.07 | -10.49 |
| 2M2P                    | ETL         | -13.73      | -9.39  | -15.29     | -15.88 | -14.76    | -6.89  | -15.60      | -9.88  | -11.73 | -10.76 |
| 2M2P                    | BTL         | -13.24      | -6.01  | -16.07     | -15.33 | -12.28    | -8.79  | -14.90      | -10.25 | -10.14 | -11.75 |
| 2M2P                    | 2M2P        | -11.62      | -8.75  | -20.70     | -14.98 | -11.84    | -9.74  | -13.05      | -10.26 | -9.49  | -11.81 |
| 2M2P                    | 1PL         | -12.79      | -7.04  | -14.90     | -15.10 | -12.59    | -8.76  | -14.93      | -9.45  | -10.44 | -11.26 |
| 2M2P                    | 2PL         | -12.35      | -6.26  | -15.21     | -17.61 | -13.22    | -8.08  | -14.40      | -9.36  | -10.31 | -11.78 |
| 2M2P                    | ANLN        | -16.67      | -5.91  | -9.76      | -17.83 | -14.86    | -6.66  | -16.53      | -3.20  | -12.50 | -8.31  |
| 2M2P                    | DEE         | -2.59       | -11.05 | -6.24      | -17.31 | -6.42     | -11.33 | -4.58       | -12.91 | -4.91  | -13.82 |
| 2M2P                    | CHCL3       | -3.31       | -11.24 | -7.96      | -16.19 | -13.74    | -11.24 | -6.90       | -13.91 | -5.44  | -15.14 |
| 2M2P                    | DEAN        | -10.22      | -9.54  | -3.55      | -18.04 | -8.05     | -11.34 | -8.31       | -12.02 | -9.35  | -13.04 |
| 2M2P                    | TEAN        | -2.40       | -10.42 | -1.33      | -16.88 | -4.09     | -11.33 | -1.17       | -12.32 | -6.19  | -13.31 |
| 2M2P                    | TOL         | -4.68       | -10.63 | -4.53      | -17.31 | -6.87     | -10.55 | -5.20       | -11.78 | -5.00  | -13.23 |

Table S.2 – Continued on next page

Table S.2 – Continued from previous page

| Solute (A)              | Solvent (B) | GROMOS-54A7 |        | GROMOS-ATB |        | OPLS-LBCC |        | AMBER-GAFF2 |        | OpenFF |        |
|-------------------------|-------------|-------------|--------|------------|--------|-----------|--------|-------------|--------|--------|--------|
|                         |             | ELE         | VDW    | ELE        | VDW    | ELE       | VDW    | ELE         | VDW    | ELE    | VDW    |
| [kJ·mol <sup>-1</sup> ] |             |             |        |            |        |           |        |             |        |        |        |
| 2M2P                    | BZN         | -6.50       | -10.21 | -4.53      | -17.52 | -6.95     | -10.85 | -7.44       | -11.48 | -5.41  | -13.04 |
| 2M2P                    | HPE         | -0.00       | -10.23 | -0.05      | -16.28 | -0.40     | -12.06 | -0.04       | -12.21 | 0.02   | -13.53 |
| 2M2P                    | HXE         | -0.00       | -10.75 | -0.03      | -16.28 | -0.37     | -12.10 | -0.04       | -12.78 | -0.01  | -13.90 |
| 2M2P                    | CCL4        | -0.00       | -10.87 | 1.03       | -19.18 | -         | -      | -0.24       | -14.24 | -0.24  | -15.96 |
| 2M2P                    | CHE         | -0.00       | -10.67 | -0.00      | -16.45 | -0.39     | -12.51 | -0.01       | -12.88 | -0.04  | -13.98 |
| 1PL                     | DAMD        | -           | -      | -13.62     | -4.61  | -15.69    | -2.47  | -18.66      | -5.64  | -17.05 | -6.60  |
| 1PL                     | PPN         | -12.78      | -9.94  | -9.72      | -8.44  | -12.70    | -6.07  | -15.21      | -7.10  | -12.16 | -8.82  |
| 1PL                     | BTN         | -11.67      | -10.30 | -9.14      | -8.70  | -11.76    | -6.87  | -14.39      | -7.29  | -11.71 | -9.30  |
| 1PL                     | PYRI        | -           | -      | -6.95      | -10.76 | -13.56    | -3.51  | -13.06      | -6.64  | -11.20 | -8.97  |
| 1PL                     | H2O         | -28.74      | 7.81   | -22.31     | 9.54   | -27.17    | 8.62   | -28.90      | 8.95   | -19.80 | 7.52   |
| 1PL                     | C2CL2       | -           | -      | -7.25      | -8.16  | -13.65    | -4.56  | -8.63       | -8.63  | -6.19  | -10.60 |
| 1PL                     | EAE         | -15.50      | -8.71  | -8.31      | -9.05  | -11.40    | -6.80  | -15.83      | -7.47  | -12.10 | -8.76  |
| 1PL                     | PTL         | -18.67      | -11.59 | -10.54     | -7.83  | -11.63    | -6.42  | -16.20      | -6.81  | -10.01 | -9.45  |
| 1PL                     | MTL         | -21.50      | -7.61  | -12.42     | -7.63  | -18.16    | -2.98  | -19.88      | -5.50  | -12.81 | -8.48  |
| 1PL                     | ETL         | -19.84      | -9.03  | -11.18     | -9.21  | -15.41    | -5.26  | -17.78      | -6.62  | -11.65 | -8.78  |
| 1PL                     | BTL         | -16.82      | -9.45  | -11.12     | -7.34  | -12.37    | -6.84  | -17.34      | -6.87  | -10.45 | -9.19  |
| 1PL                     | 2M2P        | -16.09      | -11.12 | -13.52     | -7.20  | -12.45    | -7.08  | -16.41      | -8.44  | -10.26 | -9.38  |
| 1PL                     | 1PL         | -18.40      | -9.71  | -11.10     | -8.02  | -13.35    | -5.98  | -17.86      | -6.99  | -10.90 | -8.67  |
| 1PL                     | 2PL         | -17.70      | -10.65 | -10.89     | -8.60  | -13.50    | -5.98  | -17.02      | -6.61  | -11.13 | -8.90  |
| 1PL                     | ANLN        | -21.90      | -4.59  | -9.44      | -9.26  | -15.79    | -3.34  | -20.28      | -4.01  | -12.82 | -5.37  |
| 1PL                     | DEE         | -3.52       | -11.71 | -5.24      | -10.20 | -7.53     | -9.10  | -5.56       | -9.58  | -6.04  | -11.20 |
| 1PL                     | CHCL3       | -4.00       | -12.25 | -7.43      | -9.50  | -13.64    | -8.35  | -8.42       | -10.59 | -5.30  | -12.09 |
| 1PL                     | DEAN        | -15.33      | -9.98  | -2.88      | -10.86 | -9.81     | -8.65  | -11.04      | -8.91  | -11.74 | -10.56 |
| 1PL                     | TEAN        | -3.78       | -11.59 | -0.89      | -8.91  | -5.27     | -9.08  | -1.65       | -9.27  | -9.15  | -10.85 |
| 1PL                     | TOL         | -5.96       | -11.23 | -4.14      | -9.58  | -7.43     | -7.78  | -6.26       | -8.67  | -5.58  | -10.62 |
| 1PL                     | BZN         | -8.29       | -10.81 | -4.87      | -10.87 | -7.54     | -7.89  | -9.00       | -8.22  | -6.01  | -10.62 |
| 1PL                     | HPE         | -0.00       | -11.22 | -0.04      | -10.03 | -0.38     | -9.60  | -0.04       | -9.02  | -0.03  | -10.83 |
| 1PL                     | HXE         | -0.00       | -11.48 | -0.02      | -9.79  | -0.36     | -9.42  | -0.04       | -9.66  | -0.05  | -11.57 |
| 1PL                     | CCL4        | -0.00       | -12.24 | 0.02       | -9.90  | -         | -      | -0.35       | -11.26 | -0.21  | -12.56 |
| 1PL                     | CHE         | -0.00       | -11.98 | -0.00      | -10.19 | -0.36     | -9.84  | -0.01       | -9.12  | -0.09  | -11.56 |
| 2PL                     | DAMD        | -           | -      | -17.21     | -9.99  | -16.58    | -2.18  | -17.68      | -5.39  | -17.02 | -6.45  |
| 2PL                     | PPN         | -11.64      | -8.26  | -12.34     | -11.60 | -13.53    | -6.20  | -14.37      | -7.12  | -12.11 | -8.47  |
| 2PL                     | BTN         | -10.67      | -8.25  | -11.87     | -11.79 | -12.58    | -6.58  | -13.56      | -7.08  | -11.66 | -8.80  |
| 2PL                     | PYRI        | -           | -      | -10.13     | -14.15 | -14.26    | -3.80  | -12.25      | -6.62  | -11.16 | -8.20  |
| 2PL                     | H2O         | -26.37      | 9.04   | -28.27     | 6.34   | -28.90    | 8.79   | -27.09      | 9.01   | -20.28 | 7.53   |
| 2PL                     | C2CL2       | -           | -      | -8.43      | -12.03 | -14.06    | -4.24  | -8.17       | -8.15  | -6.31  | -10.22 |
| 2PL                     | EAE         | -14.28      | -5.92  | -11.29     | -12.59 | -12.10    | -6.22  | -14.94      | -7.17  | -11.92 | -8.32  |
| 2PL                     | PTL         | -14.36      | -9.62  | -14.92     | -12.32 | -13.22    | -6.69  | -15.11      | -6.57  | -9.81  | -9.01  |
| 2PL                     | MTL         | -19.56      | -5.99  | -17.81     | -10.72 | -19.40    | -2.56  | -18.59      | -5.30  | -13.11 | -7.80  |
| 2PL                     | ETL         | -17.70      | -6.41  | -16.78     | -11.27 | -16.57    | -5.05  | -16.84      | -6.36  | -12.06 | -8.40  |
| 2PL                     | BTL         | -14.77      | -10.88 | -16.12     | -10.55 | -14.11    | -6.51  | -15.69      | -7.00  | -10.29 | -8.99  |
| 2PL                     | 2M2P        | -14.05      | -10.34 | -19.41     | -7.15  | -14.15    | -7.11  | -14.13      | -8.50  | -10.40 | -9.16  |
| 2PL                     | 1PL         | -15.55      | -9.78  | -16.04     | -11.86 | -14.96    | -6.19  | -16.56      | -6.40  | -10.92 | -8.97  |
| 2PL                     | 2PL         | -14.80      | -6.89  | -16.59     | -13.93 | -15.09    | -5.98  | -16.24      | -6.71  | -11.33 | -9.07  |
| 2PL                     | ANLN        | -18.46      | -7.62  | -12.50     | -12.64 | -16.75    | -3.06  | -18.99      | -2.23  | -12.61 | -5.80  |
| 2PL                     | DEE         | -3.08       | -10.07 | -7.92      | -13.33 | -8.24     | -8.73  | -5.21       | -9.59  | -5.81  | -10.91 |
| 2PL                     | CHCL3       | -3.69       | -9.56  | -8.62      | -12.25 | -14.06    | -8.01  | -7.77       | -10.15 | -5.47  | -12.15 |
| 2PL                     | DEAN        | -12.86      | -8.50  | -4.89      | -14.48 | -10.64    | -8.60  | -9.91       | -8.81  | -10.87 | -10.50 |
| 2PL                     | TEAN        | -3.06       | -9.02  | -1.69      | -13.28 | -5.92     | -8.77  | -1.37       | -9.01  | -7.81  | -10.63 |
| 2PL                     | TOL         | -5.27       | -9.37  | -5.61      | -12.11 | -7.80     | -7.67  | -5.78       | -8.62  | -5.36  | -10.42 |

Table S.2 – Continued on next page

Table S.2 – Continued from previous page

| Solute (A)              | Solvent (B) | GROMOS-54A7 |        | GROMOS-ATB |        | OPLS-LBCC |        | AMBER-GAFF2 |        | OpenFF |        |
|-------------------------|-------------|-------------|--------|------------|--------|-----------|--------|-------------|--------|--------|--------|
|                         |             | ELE         | VDW    | ELE        | VDW    | ELE       | VDW    | ELE         | VDW    | ELE    | VDW    |
| [kJ·mol <sup>-1</sup> ] |             |             |        |            |        |           |        |             |        |        |        |
| 2PL                     | BZN         | -7.36       | -8.52  | -6.27      | -12.45 | -7.74     | -7.80  | -8.30       | -8.14  | -5.82  | -10.64 |
| 2PL                     | HPE         | -0.00       | -9.55  | -0.04      | -12.61 | -0.42     | -9.43  | -0.05       | -8.70  | -0.01  | -10.75 |
| 2PL                     | HXE         | -0.00       | -9.65  | -0.02      | -12.83 | -0.38     | -9.66  | -0.05       | -9.27  | -0.03  | -10.99 |
| 2PL                     | CCL4        | -0.00       | -10.40 | -0.30      | -13.85 | -         | -      | -0.31       | -10.70 | -0.23  | -12.55 |
| 2PL                     | CHE         | -0.00       | -9.65  | -0.00      | -12.92 | -0.40     | -9.76  | -0.01       | -9.36  | -0.07  | -11.40 |
| ANLN                    | DAMD        | -           | -      | -15.51     | -16.77 | -18.99    | -12.65 | -22.43      | -17.83 | -23.36 | -13.99 |
| ANLN                    | PPN         | -17.35      | -16.92 | -11.39     | -19.56 | -15.10    | -15.64 | -18.75      | -17.93 | -17.24 | -15.62 |
| ANLN                    | BTN         | -15.57      | -17.37 | -9.10      | -21.12 | -13.66    | -16.37 | -17.23      | -18.74 | -16.15 | -16.08 |
| ANLN                    | PYRI        | -           | -      | -4.82      | -21.13 | -16.29    | -13.57 | -16.34      | -18.51 | -16.05 | -16.19 |
| ANLN                    | H2O         | -40.73      | 8.75   | -22.86     | 1.30   | -26.09    | 4.67   | -31.26      | 3.63   | -27.57 | 5.40   |
| ANLN                    | C2CL2       | -           | -      | -5.15      | -20.23 | -15.87    | -13.79 | -12.12      | -19.54 | -10.64 | -17.44 |
| ANLN                    | EAE         | -20.67      | -16.72 | -9.56      | -21.08 | -13.62    | -16.40 | -18.89      | -18.69 | -16.79 | -16.38 |
| ANLN                    | PTL         | -17.47      | -16.07 | -6.05      | -19.07 | -10.97    | -16.92 | -12.06      | -18.87 | -10.34 | -16.93 |
| ANLN                    | MTL         | -25.32      | -14.10 | -6.65      | -19.55 | -19.12    | -10.36 | -18.07      | -14.44 | -16.56 | -14.24 |
| ANLN                    | ETL         | -20.92      | -15.64 | -5.88      | -18.21 | -14.91    | -14.02 | -14.22      | -16.98 | -13.57 | -15.60 |
| ANLN                    | BTL         | -17.02      | -19.39 | -4.24      | -19.38 | -11.68    | -16.26 | -11.99      | -18.59 | -11.12 | -16.86 |
| ANLN                    | 2M2P        | -16.14      | -16.81 | -5.29      | -20.81 | -11.57    | -17.35 | -10.42      | -19.05 | -10.69 | -16.28 |
| ANLN                    | 1PL         | -19.10      | -15.03 | -6.39      | -19.31 | -13.15    | -15.51 | -14.09      | -17.40 | -12.20 | -16.03 |
| ANLN                    | 2PL         | -17.60      | -15.16 | -5.01      | -18.99 | -12.30    | -15.87 | -12.45      | -17.45 | -11.97 | -16.02 |
| ANLN                    | ANLN        | -28.35      | -17.31 | -5.52      | -19.97 | -15.96    | -12.95 | -23.93      | -15.34 | -18.03 | -12.74 |
| ANLN                    | DEE         | -4.93       | -18.93 | -5.23      | -20.53 | -6.68     | -9.25  | -7.02       | -20.71 | -8.26  | -18.88 |
| ANLN                    | CHCL3       | -6.86       | -19.29 | -7.82      | -18.91 | -13.86    | -17.51 | -10.62      | -22.25 | -8.99  | -19.42 |
| ANLN                    | DEAN        | -16.41      | -17.71 | -1.53      | -21.15 | -7.07     | -10.42 | -10.63      | -20.52 | -12.42 | -18.02 |
| ANLN                    | TEAN        | -4.96       | -19.11 | 0.19       | -20.61 | -3.87     | -19.65 | -2.31       | -21.53 | -9.02  | -18.81 |
| ANLN                    | TOL         | -10.35      | -18.29 | -4.02      | -19.15 | -8.40     | -17.72 | -7.34       | -21.24 | -7.80  | -17.99 |
| ANLN                    | BZN         | -14.43      | -16.57 | -7.57      | -17.46 | -8.80     | -17.92 | -11.65      | -19.77 | -9.03  | -17.85 |
| ANLN                    | HPE         | -0.00       | -19.00 | -0.03      | -19.55 | -0.48     | -19.40 | -0.12       | -21.32 | 0.08   | -18.65 |
| ANLN                    | HXE         | -0.00       | -19.27 | -0.04      | -19.98 | -0.47     | -19.62 | -0.11       | -21.41 | 0.01   | -18.86 |
| ANLN                    | CCL4        | -0.00       | -19.32 | -0.56      | -19.71 | -         | -      | -0.54       | -22.56 | -0.35  | -20.15 |
| ANLN                    | CHE         | -0.00       | -19.68 | -0.00      | -19.49 | -0.63     | -20.00 | 0.02        | -21.92 | -0.21  | -19.12 |
| DEE                     | DAMD        | -           | -      | -3.82      | -10.07 | -7.86     | -3.53  | -3.52       | -9.10  | -4.51  | -8.79  |
| DEE                     | PPN         | -1.76       | -14.42 | -2.17      | -14.26 | -6.08     | -7.96  | -3.08       | -10.88 | -3.54  | -11.06 |
| DEE                     | BTN         | -1.52       | -14.45 | -2.81      | -13.89 | -5.42     | -8.92  | -2.74       | -11.18 | -3.24  | -11.61 |
| DEE                     | PYRI        | -           | -      | -2.52      | -15.60 | -7.44     | -4.94  | -3.32       | -10.62 | -3.68  | -11.59 |
| DEE                     | H2O         | -4.27       | 7.49   | -10.12     | 6.61   | -18.11    | 10.38  | -8.12       | 9.44   | -10.85 | 8.71   |
| DEE                     | C2CL2       | -           | -      | -2.82      | -14.87 | -8.45     | -6.30  | -2.87       | -12.65 | -3.47  | -13.57 |
| DEE                     | EAE         | -1.97       | -12.56 | -2.44      | -13.90 | -5.61     | -8.39  | -2.81       | -10.89 | -3.57  | -11.21 |
| DEE                     | PTL         | -0.65       | -14.05 | -1.92      | -13.89 | -4.56     | -9.40  | -1.76       | -11.05 | -3.26  | -11.96 |
| DEE                     | MTL         | -1.93       | -10.28 | -3.18      | -11.81 | -8.99     | -3.45  | -3.31       | -8.34  | -5.19  | -10.24 |
| DEE                     | ETL         | -1.28       | -12.09 | -2.13      | -12.65 | -6.55     | -6.39  | -2.44       | -9.73  | -4.14  | -10.97 |
| DEE                     | BTL         | -0.73       | -13.25 | -1.11      | -14.83 | -4.91     | -8.90  | -1.68       | -10.50 | -3.04  | -11.95 |
| DEE                     | 2M2P        | -0.65       | -13.31 | -0.86      | -15.17 | -4.19     | -8.58  | -1.38       | -11.77 | -2.70  | -11.99 |
| DEE                     | 1PL         | -0.92       | -12.80 | -2.06      | -13.92 | -5.56     | -7.74  | -2.10       | -10.31 | -3.70  | -11.57 |
| DEE                     | 2PL         | -0.74       | -13.36 | -1.37      | -13.35 | -4.74     | -7.85  | -1.83       | -11.01 | -3.28  | -11.64 |
| DEE                     | ANLN        | -2.56       | -8.72  | -3.71      | -13.98 | -7.15     | -9.48  | -5.29       | -6.63  | -5.57  | -7.94  |
| DEE                     | DEE         | -0.51       | -15.74 | -1.57      | -15.97 | -3.18     | -11.38 | -1.34       | -13.55 | -1.69  | -14.17 |
| DEE                     | CHCL3       | -1.03       | -16.31 | -4.84      | -16.08 | -8.96     | -11.11 | -3.08       | -15.02 | -3.61  | -15.61 |
| DEE                     | DEAN        | -1.28       | -14.31 | -1.22      | -16.20 | -3.30     | -11.22 | -1.85       | -12.92 | -2.18  | -13.56 |
| DEE                     | TEAN        | -0.48       | -15.37 | -0.09      | -16.16 | -1.82     | -11.71 | -0.46       | -13.18 | -1.34  | -13.79 |
| DEE                     | TOL         | -1.04       | -15.39 | -1.48      | -15.77 | -4.24     | -10.33 | -1.67       | -13.37 | -2.16  | -13.36 |

Table S.2 – Continued on next page

Table S.2 – Continued from previous page

| Solute (A)              | Solvent (B) | GROMOS-54A7 |        | GROMOS-ATB |        | OPLS-LBCC |        | AMBER-GAFF2 |        | OpenFF |        |
|-------------------------|-------------|-------------|--------|------------|--------|-----------|--------|-------------|--------|--------|--------|
|                         |             | ELE         | VDW    | ELE        | VDW    | ELE       | VDW    | ELE         | VDW    | ELE    | VDW    |
| [kJ·mol <sup>-1</sup> ] |             |             |        |            |        |           |        |             |        |        |        |
| DEE                     | BZN         | -1.41       | -15.00 | -2.52      | -16.49 | -4.40     | -10.41 | -2.52       | -11.99 | -2.43  | -13.76 |
| DEE                     | HPE         | -0.00       | -15.18 | -0.01      | -15.35 | -0.39     | -11.84 | -0.01       | -13.18 | -0.01  | -13.89 |
| DEE                     | HXE         | -0.00       | -15.90 | -0.02      | -15.90 | -0.36     | -12.26 | -0.01       | -13.75 | -0.03  | -14.30 |
| DEE                     | CCL4        | -0.00       | -16.75 | -0.40      | -15.97 | -         | -      | -0.18       | -15.60 | 0.01   | -16.66 |
| DEE                     | CHE         | -0.00       | -16.07 | -0.00      | -16.04 | -0.40     | -12.20 | 0.01        | -13.43 | -0.07  | -14.46 |
| CHCL3                   | DAMD        | -           | -      | -7.14      | -15.12 | -12.88    | -10.58 | -7.30       | -11.37 | -7.17  | -11.23 |
| CHCL3                   | PPN         | -2.25       | -15.44 | -5.98      | -15.16 | -12.03    | -12.24 | -6.07       | -12.07 | -5.59  | -12.56 |
| CHCL3                   | BTN         | -2.10       | -15.53 | -4.59      | -16.54 | -11.55    | -13.38 | -5.81       | -12.61 | -5.37  | -12.72 |
| CHCL3                   | PYRI        | -           | -      | -4.59      | -16.58 | -11.31    | -10.93 | -5.10       | -11.81 | -4.87  | -12.33 |
| CHCL3                   | H2O         | -2.58       | 4.72   | -6.30      | 1.62   | -11.36    | 5.07   | -5.56       | 6.13   | -5.31  | 5.45   |
| CHCL3                   | C2CL2       | -           | -      | -2.49      | -17.67 | -10.23    | -9.55  | -3.08       | -12.55 | -3.06  | -13.39 |
| CHCL3                   | EAE         | -2.47       | -14.40 | -5.77      | -16.78 | -10.13    | -12.67 | -6.14       | -12.60 | -5.13  | -13.13 |
| CHCL3                   | PTL         | -1.07       | -14.88 | -3.77      | -15.86 | -10.83    | -14.21 | -3.22       | -12.44 | -3.05  | -13.82 |
| CHCL3                   | MTL         | -2.26       | -12.28 | -4.59      | -13.54 | -11.98    | -8.63  | -4.80       | -9.47  | -4.15  | -11.76 |
| CHCL3                   | ETL         | -1.75       | -13.75 | -4.33      | -14.36 | -12.17    | -11.22 | -4.06       | -11.49 | -3.83  | -12.27 |
| CHCL3                   | BTL         | -1.20       | -14.42 | -3.32      | -16.70 | -10.99    | -13.05 | -3.98       | -11.94 | -3.16  | -13.20 |
| CHCL3                   | 2M2P        | -0.81       | -14.44 | -3.08      | -16.75 | -12.57    | -13.27 | -2.50       | -13.18 | -3.33  | -13.48 |
| CHCL3                   | 1PL         | -1.36       | -14.58 | -4.30      | -15.11 | -11.84    | -12.45 | -4.46       | -11.71 | -3.60  | -13.21 |
| CHCL3                   | 2PL         | -1.17       | -13.94 | -4.25      | -16.15 | -11.96    | -13.16 | -3.96       | -11.76 | -3.49  | -12.90 |
| CHCL3                   | ANLN        | -2.92       | -12.64 | -5.60      | -15.18 | -11.38    | -9.95  | -6.53       | -6.22  | -5.66  | -8.77  |
| CHCL3                   | DEE         | -0.86       | -16.58 | -4.58      | -17.36 | -9.43     | -15.19 | -2.82       | -14.49 | -3.13  | -15.30 |
| CHCL3                   | CHCL3       | -0.61       | -17.41 | -2.70      | -18.24 | -7.14     | -13.25 | -1.91       | -13.79 | -2.00  | -14.42 |
| CHCL3                   | DEAN        | -1.83       | -14.94 | -2.13      | -17.99 | -12.53    | -15.27 | -4.20       | -14.17 | -5.16  | -14.60 |
| CHCL3                   | TEAN        | -0.93       | -15.79 | -0.72      | -18.54 | -8.46     | -15.77 | -1.12       | -14.89 | -4.21  | -15.08 |
| CHCL3                   | TOL         | -1.43       | -15.77 | -3.82      | -17.57 | -8.34     | -14.43 | -3.55       | -13.90 | -3.58  | -14.27 |
| CHCL3                   | BZN         | -1.97       | -15.60 | -5.06      | -16.56 | -7.88     | -14.43 | -4.87       | -13.23 | -3.55  | -13.87 |
| CHCL3                   | HPE         | -0.00       | -16.46 | -0.01      | -17.24 | -0.23     | -16.14 | -0.01       | -14.46 | -0.06  | -14.83 |
| CHCL3                   | HXE         | -0.00       | -16.13 | -0.00      | -17.44 | -0.23     | -16.15 | -0.02       | -14.89 | -0.04  | -15.35 |
| CHCL3                   | CCL4        | -0.00       | -17.12 | -1.39      | -18.32 | -         | -      | -0.22       | -14.30 | -0.09  | -15.06 |
| CHCL3                   | CHE         | -0.00       | -17.29 | -0.00      | -17.46 | -0.16     | -16.98 | 0.00        | -15.08 | -0.02  | -15.87 |
| DEAN                    | DAMD        | -           | -      | -2.37      | -12.17 | -9.04     | -5.95  | -7.43       | -10.39 | -6.97  | -9.65  |
| DEAN                    | PPN         | -6.90       | -12.91 | -1.15      | -15.79 | -6.93     | -10.28 | -5.97       | -11.94 | -5.46  | -11.93 |
| DEAN                    | BTN         | -6.19       | -13.18 | -0.73      | -16.92 | -6.10     | -10.76 | -5.40       | -12.33 | -4.94  | -12.60 |
| DEAN                    | PYRI        | -           | -      | -0.83      | -16.17 | -8.58     | -8.14  | -5.47       | -11.95 | -5.66  | -12.34 |
| DEAN                    | H2O         | -19.10      | 9.91   | -6.97      | 3.64   | -24.15    | 8.83   | -15.64      | 8.96   | -20.83 | 8.67   |
| DEAN                    | C2CL2       | -           | -      | 0.24       | -17.02 | -9.68     | -7.97  | -4.23       | -13.89 | -5.21  | -14.20 |
| DEAN                    | EAE         | -8.20       | -11.44 | -1.78      | -16.33 | -6.55     | -10.93 | -6.00       | -12.27 | -5.33  | -11.90 |
| DEAN                    | PTL         | -9.21       | -8.90  | -0.34      | -15.59 | -6.15     | -11.30 | -3.37       | -12.08 | -8.70  | -12.63 |
| DEAN                    | MTL         | -11.33      | -9.65  | -0.91      | -13.83 | -12.54    | -5.47  | -7.59       | -9.12  | -12.53 | -11.34 |
| DEAN                    | ETL         | -8.41       | -12.93 | -0.46      | -14.41 | -9.11     | -8.27  | -6.00       | -11.06 | -10.55 | -12.02 |
| DEAN                    | BTL         | -7.33       | -15.08 | 0.26       | -15.45 | -7.04     | -10.57 | -3.99       | -12.14 | -8.90  | -12.93 |
| DEAN                    | 2M2P        | -5.46       | -12.41 | 1.73       | -19.75 | -5.12     | -11.42 | -2.76       | -12.70 | -6.88  | -12.95 |
| DEAN                    | 1PL         | -8.10       | -9.63  | -0.32      | -15.34 | -7.63     | -10.03 | -5.31       | -11.26 | -9.60  | -12.26 |
| DEAN                    | 2PL         | -7.08       | -12.32 | -0.12      | -15.32 | -7.38     | -10.50 | -3.70       | -11.65 | -8.50  | -12.63 |
| DEAN                    | ANLN        | -8.94       | -9.96  | -1.18      | -15.58 | -8.88     | -10.15 | -7.96       | -8.98  | -9.21  | -8.31  |
| DEAN                    | DEE         | -1.86       | -15.42 | -1.24      | -17.38 | -3.53     | -13.19 | -1.96       | -14.78 | -2.37  | -14.95 |
| DEAN                    | CHCL3       | -2.84       | -15.47 | -2.00      | -16.51 | -11.24    | -13.27 | -4.57       | -16.09 | -5.71  | -16.73 |
| DEAN                    | DEAN        | -5.90       | -13.57 | -0.36      | -17.39 | -3.86     | -13.20 | -2.95       | -14.02 | -3.34  | -14.50 |
| DEAN                    | TEAN        | -1.56       | -14.76 | 0.15       | -17.42 | -1.88     | -13.69 | -0.48       | -14.64 | -1.73  | -14.66 |
| DEAN                    | TOL         | -3.57       | -15.14 | -1.09      | -18.06 | -4.20     | -12.47 | -2.58       | -14.24 | -2.95  | -14.66 |

Table S.2 – Continued on next page

Table S.2 – Continued from previous page

| Solute (A)              | Solvent (B) | GROMOS-54A7 |        | GROMOS-ATB |        | OPLS-LBCC |        | AMBER-GAFF2 |        | OpenFF |        |
|-------------------------|-------------|-------------|--------|------------|--------|-----------|--------|-------------|--------|--------|--------|
|                         |             | ELE         | VDW    | ELE        | VDW    | ELE       | VDW    | ELE         | VDW    | ELE    | VDW    |
| [kJ·mol <sup>-1</sup> ] |             |             |        |            |        |           |        |             |        |        |        |
| DEAN                    | BZN         | -4.90       | -14.89 | -2.40      | -17.31 | -4.39     | -13.02 | -3.73       | -13.02 | -3.36  | -14.60 |
| DEAN                    | HPE         | -0.00       | -14.95 | 0.00       | -16.72 | -0.36     | -13.95 | -0.02       | -14.58 | -0.02  | -14.89 |
| DEAN                    | HXE         | -0.00       | -14.95 | -0.00      | -17.09 | -0.34     | -14.24 | -0.02       | -14.64 | -0.06  | -15.17 |
| DEAN                    | CCL4        | -0.00       | -15.78 | -1.03      | -17.87 | -         | -      | -0.18       | -16.60 | -0.06  | -17.49 |
| DEAN                    | CHE         | -0.00       | -15.09 | -0.00      | -17.46 | -0.39     | -14.19 | 0.00        | -14.58 | -0.14  | -15.20 |
| TEAN                    | DAMD        | -           | -      | 0.32       | -21.87 | -5.55     | -9.85  | -1.36       | -16.85 | -4.28  | -14.56 |
| TEAN                    | PPN         | -1.82       | -20.36 | 1.73       | -24.03 | -3.75     | -15.60 | -1.10       | -18.59 | -3.27  | -16.76 |
| TEAN                    | BTN         | -1.55       | -20.96 | 1.23       | -24.93 | -3.41     | -16.11 | -0.97       | -18.84 | -2.92  | -17.52 |
| TEAN                    | PYRI        | -           | -      | -1.24      | -24.20 | -5.34     | -13.71 | -1.32       | -18.19 | -3.93  | -18.20 |
| TEAN                    | H2O         | -7.86       | 9.47   | -2.71      | 4.72   | -16.71    | 8.41   | -3.50       | 8.06   | -18.07 | 8.84   |
| TEAN                    | C2CL2       | -           | -      | 2.01       | -26.71 | -5.96     | -14.06 | -1.06       | -21.36 | -3.83  | -20.08 |
| TEAN                    | EAE         | -1.87       | -19.55 | -0.53      | -23.91 | -3.81     | -16.45 | -1.09       | -18.85 | -3.31  | -17.47 |
| TEAN                    | PTL         | -0.56       | -20.69 | 0.28       | -23.87 | -3.31     | -16.49 | -0.41       | -19.32 | -7.03  | -18.27 |
| TEAN                    | MTL         | -2.04       | -14.99 | 0.64       | -20.46 | -6.85     | -9.90  | -1.18       | -14.35 | -9.95  | -15.80 |
| TEAN                    | ETL         | -1.21       | -17.94 | 0.48       | -21.63 | -4.59     | -13.69 | -0.76       | -17.70 | -8.41  | -17.09 |
| TEAN                    | BTL         | -0.66       | -19.45 | 0.54       | -22.76 | -3.20     | -16.52 | -0.50       | -18.07 | -6.47  | -18.32 |
| TEAN                    | 2M2P        | -0.50       | -19.95 | 3.05       | -29.45 | -2.40     | -16.83 | -0.34       | -19.67 | -3.40  | -17.96 |
| TEAN                    | 1PL         | -0.92       | -19.06 | 0.64       | -23.20 | -3.77     | -15.79 | -0.78       | -17.10 | -7.11  | -17.62 |
| TEAN                    | 2PL         | -0.75       | -19.41 | 0.99       | -23.25 | -3.24     | -15.42 | -0.60       | -18.21 | -6.41  | -17.44 |
| TEAN                    | ANLN        | -2.22       | -18.58 | 0.03       | -23.85 | -6.04     | -15.21 | -2.18       | -14.71 | -7.18  | -10.40 |
| TEAN                    | DEE         | -0.54       | -22.10 | -0.32      | -25.80 | -1.97     | -19.30 | -0.49       | -21.40 | -1.61  | -20.57 |
| TEAN                    | CHCL3       | -1.10       | -23.75 | -0.99      | -26.55 | -7.53     | -20.09 | -1.20       | -23.72 | -4.71  | -22.90 |
| TEAN                    | DEAN        | -1.10       | -20.17 | -0.11      | -26.40 | -1.93     | -19.01 | -0.50       | -21.22 | -1.80  | -19.65 |
| TEAN                    | TEAN        | -0.44       | -22.42 | 0.32       | -27.15 | -1.19     | -20.37 | -0.18       | -21.86 | -1.18  | -20.49 |
| TEAN                    | TOL         | -1.00       | -22.55 | -0.27      | -27.29 | -2.66     | -18.64 | -0.67       | -21.33 | -2.14  | -20.09 |
| TEAN                    | BZN         | -1.40       | -21.74 | -1.82      | -25.92 | -2.85     | -19.14 | -1.04       | -20.09 | -2.46  | -20.37 |
| TEAN                    | HPE         | -0.00       | -22.03 | 0.02       | -26.02 | -0.35     | -20.10 | 0.00        | -21.91 | 0.04   | -20.52 |
| TEAN                    | HXE         | -0.00       | -22.33 | -0.01      | -26.24 | -0.33     | -20.39 | -0.01       | -22.09 | -0.02  | -20.63 |
| TEAN                    | CCL4        | -0.00       | -23.83 | -1.38      | -25.76 | -         | -      | -0.12       | -25.05 | 0.04   | -24.08 |
| TEAN                    | CHE         | -0.00       | -23.18 | -0.00      | -26.07 | -0.37     | -20.71 | 0.01        | -22.77 | -0.11  | -21.39 |
| TOL                     | DAMD        | -           | -      | -3.49      | -16.61 | -9.32     | -10.62 | -5.01       | -15.20 | -6.54  | -11.23 |
| TOL                     | PPN         | -3.68       | -18.11 | -2.24      | -19.28 | -7.23     | -15.12 | -4.49       | -16.16 | -5.07  | -13.66 |
| TOL                     | BTN         | -3.14       | -18.65 | -1.53      | -20.28 | -6.50     | -15.28 | -3.92       | -16.71 | -4.59  | -14.43 |
| TOL                     | PYRI        | -           | -      | -4.66      | -17.81 | -8.94     | -12.42 | -4.32       | -15.81 | -4.87  | -13.68 |
| TOL                     | H2O         | -8.77       | 5.63   | -7.95      | 6.01   | -13.87    | 6.72   | -9.80       | 6.82   | -11.68 | 8.28   |
| TOL                     | C2CL2       | -           | -      | -0.80      | -21.42 | -9.67     | -12.50 | -4.51       | -18.46 | -4.85  | -15.89 |
| TOL                     | EAE         | -4.12       | -16.86 | -2.93      | -18.76 | -6.60     | -15.20 | -4.05       | -16.25 | -4.66  | -13.60 |
| TOL                     | PTL         | -1.28       | -17.62 | -1.04      | -19.69 | -4.15     | -16.24 | -1.88       | -16.85 | -2.73  | -15.35 |
| TOL                     | MTL         | -4.05       | -13.53 | -2.13      | -16.03 | -9.02     | -9.19  | -4.35       | -12.20 | -5.38  | -13.03 |
| TOL                     | ETL         | -2.53       | -15.86 | -1.50      | -17.49 | -6.52     | -12.70 | -2.91       | -15.26 | -4.17  | -14.17 |
| TOL                     | BTL         | -1.58       | -18.46 | -0.56      | -19.19 | -4.56     | -15.14 | -2.14       | -16.04 | -2.84  | -15.26 |
| TOL                     | 2M2P        | -1.30       | -17.88 | -0.41      | -19.39 | -4.26     | -16.07 | -1.42       | -17.24 | -2.65  | -14.69 |
| TOL                     | 1PL         | -1.83       | -17.30 | -1.15      | -18.40 | -5.41     | -14.92 | -2.84       | -15.63 | -3.48  | -14.34 |
| TOL                     | 2PL         | -1.57       | -17.38 | -0.97      | -18.58 | -4.78     | -14.80 | -2.15       | -16.12 | -3.29  | -14.25 |
| TOL                     | ANLN        | -7.08       | -11.84 | -3.49      | -17.20 | -8.49     | -12.85 | -5.25       | -10.88 | -7.19  | -10.28 |
| TOL                     | DEE         | -1.02       | -20.57 | -1.47      | -21.16 | -3.87     | -17.96 | -1.67       | -19.04 | -2.21  | -17.21 |
| TOL                     | CHCL3       | -2.02       | -20.59 | -4.22      | -19.83 | -9.90     | -17.58 | -4.33       | -20.48 | -4.73  | -18.27 |
| TOL                     | DEAN        | -2.58       | -18.55 | -1.02      | -21.50 | -3.64     | -17.92 | -2.34       | -18.84 | -2.82  | -16.69 |
| TOL                     | TEAN        | -0.92       | -19.75 | 0.29       | -22.34 | -2.24     | -18.93 | -0.59       | -19.26 | -1.82  | -16.60 |
| TOL                     | TOL         | -2.33       | -19.04 | -1.55      | -20.41 | -4.77     | -17.25 | -1.69       | -18.97 | -2.47  | -16.56 |

Table S.2 – Continued on next page

Table S.2 – Continued from previous page

| Solute (A)              | Solvent (B) | GROMOS-54A7 |        | GROMOS-ATB |        | OPLS-LBCC |        | AMBER-GAFF2 |        | OpenFF |        |
|-------------------------|-------------|-------------|--------|------------|--------|-----------|--------|-------------|--------|--------|--------|
|                         |             | ELE         | VDW    | ELE        | VDW    | ELE       | VDW    | ELE         | VDW    | ELE    | VDW    |
| [kJ·mol <sup>-1</sup> ] |             |             |        |            |        |           |        |             |        |        |        |
| TOL                     | BZN         | -3.45       | -18.58 | -4.03      | -18.73 | -5.12     | -17.63 | -3.09       | -17.82 | -3.05  | -16.55 |
| TOL                     | HPE         | -0.00       | -20.12 | -0.01      | -21.34 | -0.32     | -18.97 | -0.06       | -19.07 | 0.09   | -17.29 |
| TOL                     | HXE         | -0.00       | -19.69 | -0.02      | -21.25 | -0.32     | -18.87 | -0.07       | -19.49 | 0.03   | -17.38 |
| TOL                     | CCL4        | -0.00       | -20.31 | -1.17      | -20.69 | -         | -      | -0.17       | -21.01 | -0.14  | -18.70 |
| TOL                     | CHE         | -0.00       | -20.22 | -0.00      | -21.53 | -0.44     | -19.24 | 0.02        | -19.74 | -0.11  | -17.67 |
| BZN                     | DAMD        | -           | -      | -3.87      | -13.90 | -8.31     | -8.65  | -6.20       | -11.77 | -6.34  | -8.82  |
| BZN                     | PPN         | -4.39       | -14.31 | -2.53      | -15.80 | -6.41     | -12.29 | -5.63       | -12.94 | -4.94  | -11.15 |
| BZN                     | BTN         | -3.66       | -14.98 | -1.14      | -17.26 | -5.84     | -12.98 | -4.96       | -13.22 | -4.44  | -11.58 |
| BZN                     | PYRI        | -           | -      | -6.10      | -12.46 | -7.87     | -9.96  | -5.79       | -12.69 | -4.87  | -11.09 |
| BZN                     | H2O         | -12.21      | 6.81   | -8.69      | 4.66   | -11.74    | 5.77   | -13.34      | 6.27   | -11.08 | 7.72   |
| BZN                     | C2CL2       | -           | -      | 0.09       | -19.02 | -8.30     | -10.48 | -5.68       | -14.36 | -4.63  | -12.81 |
| BZN                     | EAE         | -4.86       | -13.12 | -3.86      | -14.94 | -5.82     | -13.21 | -5.22       | -13.21 | -4.72  | -11.50 |
| BZN                     | PTL         | -1.50       | -15.07 | -1.02      | -16.65 | -3.47     | -13.49 | -2.55       | -12.62 | -2.47  | -11.67 |
| BZN                     | MTL         | -4.80       | -11.43 | -2.65      | -13.34 | -7.91     | -7.70  | -5.60       | -9.82  | -5.11  | -10.21 |
| BZN                     | ETL         | -3.05       | -13.41 | -1.85      | -14.85 | -5.70     | -10.73 | -3.89       | -12.14 | -3.92  | -10.83 |
| BZN                     | BTL         | -1.75       | -14.06 | -0.70      | -15.49 | -4.05     | -12.79 | -2.70       | -12.49 | -2.80  | -11.71 |
| BZN                     | 2M2P        | -1.56       | -14.87 | 0.16       | -18.11 | -3.91     | -13.73 | -2.04       | -13.50 | -2.74  | -11.99 |
| BZN                     | 1PL         | -2.11       | -13.50 | -1.40      | -15.47 | -4.78     | -12.50 | -3.50       | -12.05 | -3.27  | -11.60 |
| BZN                     | 2PL         | -1.81       | -14.21 | -1.56      | -14.32 | -4.28     | -12.46 | -2.79       | -12.37 | -3.23  | -11.31 |
| BZN                     | ANLN        | -8.00       | -6.98  | -5.09      | -12.00 | -7.60     | -10.16 | -8.64       | -8.34  | -7.44  | -6.81  |
| BZN                     | DEE         | -1.21       | -16.83 | -1.93      | -17.29 | -3.53     | -15.06 | -2.05       | -15.36 | -2.12  | -13.76 |
| BZN                     | CHCL3       | -2.57       | -16.23 | -4.52      | -16.16 | -8.27     | -14.38 | -6.05       | -16.12 | -4.28  | -14.37 |
| BZN                     | DEAN        | -3.35       | -15.25 | -1.32      | -17.92 | -3.30     | -14.71 | -3.12       | -14.91 | -2.77  | -13.14 |
| BZN                     | TEAN        | -0.97       | -16.15 | 0.05       | -18.35 | -2.02     | -15.80 | -0.68       | -15.01 | -1.81  | -13.51 |
| BZN                     | TOL         | -2.99       | -14.60 | -2.20      | -16.32 | -4.31     | -14.40 | -2.56       | -15.15 | -2.59  | -13.20 |
| BZN                     | BZN         | -4.15       | -13.91 | -5.60      | -13.53 | -4.66     | -14.19 | -4.22       | -14.25 | -3.26  | -12.87 |
| BZN                     | HPE         | -0.00       | -16.17 | 0.00       | -17.91 | -0.30     | -15.91 | -0.07       | -15.14 | 0.07   | -13.84 |
| BZN                     | HXE         | -0.00       | -16.61 | -0.01      | -17.54 | -0.30     | -16.21 | -0.06       | -15.61 | 0.01   | -13.97 |
| BZN                     | CCL4        | -0.00       | -16.50 | -2.15      | -16.11 | -         | -      | -0.25       | -16.94 | -0.12  | -15.11 |
| BZN                     | CHE         | -0.00       | -17.32 | -0.00      | -17.63 | -0.39     | -16.45 | 0.02        | -15.50 | -0.11  | -13.95 |
| HPE                     | DAMD        | -           | -      | -0.02      | -13.18 | -1.09     | -8.06  | -0.04       | -17.94 | -0.10  | -12.42 |
| HPE                     | PPN         | -0.00       | -20.09 | -0.03      | -17.54 | -0.69     | -13.68 | -0.02       | -19.13 | -0.04  | -16.41 |
| HPE                     | BTN         | -0.00       | -20.40 | -0.05      | -18.57 | -0.63     | -14.40 | -0.02       | -20.15 | -0.08  | -16.89 |
| HPE                     | PYRI        | -           | -      | 0.03       | -19.03 | -0.87     | -10.45 | -0.05       | -19.55 | 0.02   | -16.85 |
| HPE                     | H2O         | -0.00       | 10.43  | -0.07      | 10.05  | -0.43     | 11.73  | -0.03       | 9.55   | 0.19   | 11.53  |
| HPE                     | C2CL2       | -           | -      | -0.11      | -19.53 | -0.46     | -11.10 | -0.03       | -22.00 | -0.02  | -19.38 |
| HPE                     | EAE         | -0.00       | -17.75 | 0.05       | -18.67 | -0.79     | -13.85 | -0.02       | -19.57 | -0.09  | -16.03 |
| HPE                     | PTL         | -0.00       | -19.42 | -0.00      | -19.71 | -0.47     | -14.53 | 0.02        | -19.67 | -0.01  | -17.73 |
| HPE                     | MTL         | -0.00       | -15.03 | 0.01       | -15.60 | -0.89     | -7.08  | -0.01       | -15.08 | 0.00   | -15.36 |
| HPE                     | ETL         | -0.00       | -17.10 | 0.01       | -18.21 | -0.69     | -11.61 | 0.00        | -17.73 | 0.01   | -15.86 |
| HPE                     | BTL         | -0.00       | -19.78 | -0.01      | -18.43 | -0.53     | -13.81 | 0.01        | -18.79 | 0.06   | -16.97 |
| HPE                     | 2M2P        | -0.00       | -18.73 | -0.01      | -19.68 | -0.50     | -14.56 | 0.00        | -20.48 | 0.08   | -18.01 |
| HPE                     | 1PL         | -0.00       | -19.07 | -0.00      | -18.16 | -0.61     | -13.57 | 0.02        | -18.33 | -0.01  | -16.46 |
| HPE                     | 2PL         | -0.00       | -19.10 | 0.03       | -18.83 | -0.53     | -13.57 | 0.01        | -18.96 | 0.03   | -16.98 |
| HPE                     | ANLN        | -0.00       | -13.45 | -0.01      | -17.96 | -0.83     | -9.88  | -0.12       | -13.99 | 0.10   | -10.79 |
| HPE                     | DEE         | -0.00       | -22.86 | 0.01       | -22.07 | -0.51     | -17.53 | -0.01       | -22.67 | 0.00   | -20.15 |
| HPE                     | CHCL3       | -0.00       | -23.56 | -0.01      | -21.04 | -0.01     | -17.53 | -0.02       | -25.07 | -0.07  | -22.45 |
| HPE                     | DEAN        | -0.00       | -19.78 | 0.00       | -22.12 | -0.49     | -17.23 | -0.01       | -22.03 | -0.01  | -19.24 |
| HPE                     | TEAN        | -0.00       | -22.00 | -0.00      | -22.44 | -0.40     | -18.12 | 0.00        | -23.02 | 0.04   | -20.04 |
| HPE                     | TOL         | -0.00       | -22.02 | -0.01      | -22.88 | -0.53     | -16.47 | -0.06       | -22.69 | 0.09   | -20.14 |

Table S.2 – Continued on next page

Table S.2 – Continued from previous page

| Solute (A)              | Solvent (B) | GROMOS-54A7 |        | GROMOS-ATB |        | OPLS-LBCC |        | AMBER-GAFF2 |        | OpenFF |        |
|-------------------------|-------------|-------------|--------|------------|--------|-----------|--------|-------------|--------|--------|--------|
|                         |             | ELE         | VDW    | ELE        | VDW    | ELE       | VDW    | ELE         | VDW    | ELE    | VDW    |
| [kJ·mol <sup>-1</sup> ] |             |             |        |            |        |           |        |             |        |        |        |
| HPE                     | BZN         | -0.00       | -21.34 | 0.02       | -23.71 | -0.52     | -16.62 | -0.07       | -21.37 | 0.09   | -19.59 |
| HPE                     | HPE         | -0.00       | -22.03 | 0.00       | -22.05 | -0.19     | -18.49 | 0.00        | -22.65 | 0.11   | -20.57 |
| HPE                     | HXE         | -0.00       | -21.97 | -0.00      | -22.03 | -0.18     | -18.77 | 0.00        | -23.05 | 0.08   | -20.80 |
| HPE                     | CCL4        | -0.00       | -22.95 | 0.06       | -22.20 | -         | -      | 0.00        | -26.10 | -0.06  | -22.99 |
| HPE                     | CHE         | -0.00       | -22.96 | -0.00      | -22.89 | -0.22     | -18.47 | 0.00        | -22.89 | 0.05   | -20.91 |
| HXE                     | DAMD        | -           | -      | -0.02      | -10.56 | -0.95     | -5.94  | -0.02       | -14.87 | -0.13  | -10.00 |
| HXE                     | PPN         | -0.00       | -16.44 | -0.05      | -14.53 | -0.60     | -10.92 | -0.02       | -15.63 | -0.03  | -13.36 |
| HXE                     | BTN         | -0.00       | -17.24 | -0.01      | -15.74 | -0.54     | -11.05 | -0.01       | -16.49 | -0.07  | -13.99 |
| HXE                     | PYRI        | -           | -      | 0.03       | -15.43 | -0.77     | -7.35  | -0.05       | -15.96 | -0.02  | -13.81 |
| HXE                     | H2O         | -0.00       | 9.43   | -0.04      | 8.37   | -0.35     | 10.94  | -0.04       | 9.30   | 0.12   | 11.01  |
| HXE                     | C2CL2       | -           | -      | -0.04      | -16.36 | -0.40     | -8.60  | -0.02       | -18.22 | -0.02  | -15.77 |
| HXE                     | EAE         | -0.00       | -14.69 | 0.00       | -15.68 | -0.69     | -11.33 | -0.01       | -15.99 | -0.09  | -13.16 |
| HXE                     | PTL         | -0.00       | -17.02 | 0.00       | -16.83 | -0.41     | -11.30 | 0.02        | -15.66 | -0.05  | -13.87 |
| HXE                     | MTL         | -0.00       | -12.89 | -0.00      | -13.03 | -0.78     | -5.58  | -0.01       | -12.63 | -0.03  | -12.16 |
| HXE                     | ETL         | -0.00       | -14.49 | 0.02       | -14.09 | -0.59     | -9.31  | 0.02        | -15.10 | -0.03  | -13.27 |
| HXE                     | BTL         | -0.00       | -15.89 | 0.02       | -16.43 | -0.46     | -11.57 | 0.01        | -15.70 | 0.01   | -13.94 |
| HXE                     | 2M2P        | -0.00       | -16.72 | -0.01      | -19.08 | -0.46     | -11.63 | 0.01        | -17.57 | 0.02   | -14.57 |
| HXE                     | 1PL         | -0.00       | -16.30 | -0.01      | -15.54 | -0.52     | -11.18 | 0.03        | -14.89 | -0.05  | -13.87 |
| HXE                     | 2PL         | -0.00       | -16.04 | 0.01       | -16.61 | -0.46     | -10.97 | 0.03        | -15.60 | -0.02  | -14.10 |
| HXE                     | ANLN        | -0.00       | -10.66 | -0.03      | -14.86 | -0.76     | -7.67  | -0.13       | -10.76 | -0.03  | -8.27  |
| HXE                     | DEE         | -0.00       | -19.24 | -0.01      | -18.20 | -0.45     | -14.56 | 0.00        | -18.84 | -0.03  | -17.08 |
| HXE                     | CHCL3       | -0.00       | -19.94 | -0.01      | -17.77 | 0.00      | -14.73 | -0.01       | -21.05 | -0.03  | -18.80 |
| HXE                     | DEAN        | -0.00       | -17.27 | -0.01      | -18.89 | -0.42     | -14.54 | -0.02       | -18.93 | -0.07  | -15.91 |
| HXE                     | TEAN        | -0.00       | -19.13 | -0.02      | -18.11 | -0.34     | -14.45 | 0.00        | -19.26 | -0.02  | -16.49 |
| HXE                     | TOL         | -0.00       | -18.42 | -0.03      | -19.05 | -0.48     | -13.61 | -0.06       | -18.93 | 0.02   | -16.36 |
| HXE                     | BZN         | -0.00       | -18.57 | -0.00      | -19.82 | -0.47     | -13.91 | -0.05       | -17.89 | 0.01   | -16.14 |
| HXE                     | HPE         | -0.00       | -18.36 | -0.00      | -18.63 | -0.16     | -15.62 | 0.00        | -19.12 | 0.07   | -16.92 |
| HXE                     | HXE         | -0.00       | -18.40 | 0.00       | -18.82 | -0.15     | -15.74 | 0.00        | -19.17 | 0.04   | -17.29 |
| HXE                     | CCL4        | -0.00       | -20.44 | 0.01       | -19.07 | -         | -      | 0.00        | -22.28 | -0.03  | -19.30 |
| HXE                     | CHE         | -0.00       | -19.11 | -0.00      | -19.16 | -0.18     | -15.60 | 0.00        | -18.87 | 0.01   | -16.99 |
| CCL4                    | DAMD        | -           | -      | 0.74       | -19.00 | -         | -      | -0.52       | -15.27 | -0.02  | -14.99 |
| CCL4                    | PPN         | -0.00       | -16.99 | 0.90       | -19.12 | -         | -      | -0.34       | -15.80 | -0.15  | -16.21 |
| CCL4                    | BTN         | -0.00       | -17.26 | 2.32       | -20.97 | -         | -      | -0.30       | -16.47 | -0.10  | -16.83 |
| CCL4                    | PYRI        | -           | -      | -1.00      | -19.89 | -         | -      | -0.38       | -15.00 | -0.15  | -16.46 |
| CCL4                    | H2O         | -0.00       | 5.81   | -0.69      | 1.36   | -         | -      | -0.26       | 6.04   | -0.56  | 4.92   |
| CCL4                    | C2CL2       | -           | -      | 3.88       | -22.83 | -         | -      | -0.20       | -16.18 | -0.16  | -17.48 |
| CCL4                    | EAE         | -0.00       | -15.72 | -1.17      | -19.41 | -         | -      | -0.42       | -16.40 | -0.06  | -16.97 |
| CCL4                    | PTL         | -0.00       | -16.49 | 0.28       | -19.47 | -         | -      | -0.20       | -16.49 | 0.02   | -18.00 |
| CCL4                    | MTL         | -0.00       | -13.47 | 0.80       | -16.50 | -         | -      | -0.36       | -12.36 | -0.09  | -15.20 |
| CCL4                    | ETL         | -0.00       | -14.66 | 0.52       | -17.75 | -         | -      | -0.27       | -14.93 | -0.01  | -16.53 |
| CCL4                    | BTL         | -0.00       | -15.36 | 0.89       | -19.47 | -         | -      | -0.23       | -16.09 | -0.02  | -17.55 |
| CCL4                    | 2M2P        | -0.00       | -15.41 | 2.49       | -22.23 | -         | -      | -0.14       | -17.77 | 0.00   | -17.36 |
| CCL4                    | 1PL         | -0.00       | -15.22 | 0.78       | -18.83 | -         | -      | -0.28       | -14.82 | 0.02   | -16.94 |
| CCL4                    | 2PL         | -0.00       | -14.80 | 0.12       | -18.90 | -         | -      | -0.27       | -15.02 | 0.04   | -16.96 |
| CCL4                    | ANLN        | -0.00       | -10.42 | -0.99      | -17.68 | -         | -      | -0.48       | -9.16  | -0.11  | -13.14 |
| CCL4                    | DEE         | -0.00       | -18.03 | -0.70      | -20.66 | -         | -      | -0.17       | -18.29 | 0.02   | -19.30 |
| CCL4                    | CHCL3       | -0.00       | -18.61 | -0.11      | -22.99 | -         | -      | -0.15       | -17.39 | -0.11  | -18.52 |
| CCL4                    | DEAN        | -0.00       | -16.26 | -0.12      | -21.21 | -         | -      | -0.15       | -18.14 | 0.01   | -18.65 |
| CCL4                    | TEAN        | -0.00       | -18.35 | 0.41       | -22.80 | -         | -      | -0.09       | -18.73 | 0.05   | -19.55 |
| CCL4                    | TOL         | -0.00       | -17.87 | -0.68      | -21.39 | -         | -      | -0.22       | -18.11 | -0.08  | -18.54 |

Table S.2 – Continued on next page

Table S.2 – Continued from previous page

| Solute (A)              | Solvent (B) | GROMOS-54A7 |        | GROMOS-ATB |        | OPLS-LBCC |        | AMBER-GAFF2 |        | OpenFF |        |
|-------------------------|-------------|-------------|--------|------------|--------|-----------|--------|-------------|--------|--------|--------|
|                         |             | ELE         | VDW    | ELE        | VDW    | ELE       | VDW    | ELE         | VDW    | ELE    | VDW    |
| [kJ·mol <sup>-1</sup> ] |             |             |        |            |        |           |        |             |        |        |        |
| CCL4                    | BZN         | -0.00       | -16.71 | -2.89      | -19.69 | -         | -      | -0.33       | -17.20 | -0.08  | -18.12 |
| CCL4                    | HPE         | -0.00       | -18.10 | 0.02       | -20.38 | -         | -      | 0.00        | -18.72 | -0.04  | -19.12 |
| CCL4                    | HXE         | -0.00       | -18.38 | 0.01       | -20.47 | -         | -      | 0.00        | -18.93 | -0.02  | -19.50 |
| CCL4                    | CCL4        | -0.00       | -18.68 | -3.04      | -20.82 | -         | -      | -0.07       | -18.18 | -0.02  | -19.12 |
| CCL4                    | CHE         | -0.00       | -18.55 | -0.00      | -20.39 | -         | -      | 0.01        | -19.27 | 0.01   | -20.34 |
| CHE                     | DAMD        | -           | -      | -0.00      | -9.20  | -0.78     | -8.97  | 0.02        | -16.72 | -0.12  | -13.60 |
| CHE                     | PPN         | -0.00       | -18.96 | -0.00      | -13.52 | -0.46     | -12.94 | 0.01        | -17.35 | 0.00   | -15.58 |
| CHE                     | BTN         | -0.00       | -18.52 | -0.00      | -14.03 | -0.42     | -13.22 | 0.00        | -18.08 | -0.06  | -16.00 |
| CHE                     | PYRI        | -           | -      | -0.00      | -14.57 | -0.67     | -11.20 | 0.01        | -18.12 | -0.10  | -16.31 |
| CHE                     | H2O         | -0.00       | 5.52   | -0.00      | 6.70   | -0.16     | 6.43   | -0.04       | 4.43   | 0.09   | 5.75   |
| CHE                     | C2CL2       | -           | -      | -0.00      | -15.39 | -0.24     | -11.92 | 0.00        | -19.69 | -0.01  | -18.28 |
| CHE                     | EAE         | -0.00       | -17.30 | -0.00      | -14.64 | -0.57     | -13.02 | 0.01        | -18.34 | -0.10  | -16.44 |
| CHE                     | PTL         | -0.00       | -17.84 | -0.00      | -15.19 | -0.34     | -13.82 | 0.00        | -17.65 | -0.08  | -16.47 |
| CHE                     | MTL         | -0.00       | -14.29 | -0.00      | -11.67 | -0.62     | -8.03  | 0.01        | -13.89 | -0.05  | -14.62 |
| CHE                     | ETL         | -0.00       | -15.66 | -0.00      | -13.35 | -0.49     | -11.07 | 0.01        | -16.88 | -0.05  | -15.60 |
| CHE                     | BTL         | -0.00       | -17.67 | -0.00      | -14.47 | -0.39     | -13.07 | 0.01        | -17.54 | -0.02  | -16.52 |
| CHE                     | 2M2P        | -0.00       | -17.71 | -0.00      | -15.24 | -0.37     | -13.81 | 0.01        | -18.28 | -0.04  | -16.85 |
| CHE                     | 1PL         | -0.00       | -17.22 | -0.00      | -14.29 | -0.44     | -12.52 | 0.01        | -16.64 | -0.08  | -16.40 |
| CHE                     | 2PL         | -0.00       | -17.65 | -0.00      | -13.16 | -0.38     | -12.64 | 0.01        | -17.91 | -0.06  | -16.19 |
| CHE                     | ANLN        | -0.00       | -15.79 | -0.00      | -13.77 | -0.74     | -10.53 | 0.03        | -13.37 | -0.19  | -12.13 |
| CHE                     | DEE         | -0.00       | -20.14 | -0.00      | -16.39 | -0.38     | -15.88 | 0.01        | -20.43 | -0.06  | -18.58 |
| CHE                     | CHCL3       | -0.00       | -21.55 | -0.00      | -15.67 | 0.04      | -16.53 | 0.00        | -22.70 | 0.00   | -20.62 |
| CHE                     | DEAN        | -0.00       | -18.41 | -0.00      | -17.36 | -0.38     | -16.05 | 0.01        | -19.62 | -0.14  | -17.93 |
| CHE                     | TEAN        | -0.00       | -20.03 | -0.00      | -16.84 | -0.31     | -16.13 | 0.01        | -20.84 | -0.09  | -18.59 |
| CHE                     | TOL         | -0.00       | -20.15 | -0.00      | -17.34 | -0.47     | -15.10 | 0.02        | -20.34 | -0.10  | -18.06 |
| CHE                     | BZN         | -0.00       | -19.88 | -0.00      | -17.54 | -0.46     | -15.62 | 0.02        | -18.91 | -0.12  | -18.06 |
| CHE                     | HPE         | -0.00       | -19.99 | -0.00      | -16.76 | -0.15     | -16.22 | 0.00        | -20.51 | 0.04   | -18.61 |
| CHE                     | HXE         | -0.00       | -20.19 | -0.00      | -16.98 | -0.14     | -16.42 | 0.00        | -20.59 | 0.01   | -18.62 |
| CHE                     | CCL4        | -0.00       | -20.80 | -0.00      | -16.81 | -         | -      | 0.01        | -22.85 | 0.01   | -21.55 |
| CHE                     | CHE         | -0.00       | -21.03 | -0.00      | -16.92 | -0.16     | -16.89 | 0.00        | -21.75 | -0.03  | -20.00 |









Table S.3: Numerical values of the difference between experimental and calculated cross-solvation free energies  $\Delta_s G_{A:B}^\ominus$ . The differences (simulation minus experiment) are calculated based on the data in Tab. S.1. The results are reported for the the five force fields newly considered in this work (Main Article Tab. 1). The molecules considered and their acronyms are shown in Main Article Fig. 1.

| Solute (A) | Solvent (B) | GROMOS-54A7             | GROMOS-ATB | OPLS-LBCC | AMBER-GAFF2 | OpenFF |
|------------|-------------|-------------------------|------------|-----------|-------------|--------|
|            |             | [kJ·mol <sup>-1</sup> ] |            |           |             |        |
| DAMD       | DAMD        | -                       | -16.81     | -10.48    | -5.29       | -7.05  |
| DAMD       | PPN         | -                       | -12.40     | -7.24     | -2.55       | -4.57  |
| DAMD       | BTN         | -                       | -12.74     | -8.09     | -3.75       | -5.35  |
| DAMD       | PYRI        | -                       | -15.40     | -10.80    | -6.21       | -8.25  |
| DAMD       | H2O         | -                       | -12.91     | -12.75    | -3.09       | -9.75  |
| DAMD       | C2CL2       | -                       | -12.05     | -10.24    | -4.16       | -7.08  |
| DAMD       | EAE         | -                       | -10.90     | -5.73     | -0.88       | -3.73  |
| DAMD       | PTL         | -                       | -13.54     | -8.44     | -7.42       | -12.35 |
| DAMD       | MTL         | -                       | -16.56     | -12.36    | -9.13       | -18.00 |
| DAMD       | ETL         | -                       | -16.26     | -11.33    | -10.46      | -16.01 |
| DAMD       | BTL         | -                       | -15.67     | -11.61    | -9.36       | -17.22 |
| DAMD       | 2M2P        | -                       | -15.97     | -6.09     | -5.19       | -10.51 |
| DAMD       | 1PL         | -                       | -15.41     | -9.62     | -8.41       | -14.83 |
| DAMD       | 2PL         | -                       | -15.76     | -8.37     | -6.97       | -13.39 |
| DAMD       | ANLN        | -                       | -18.89     | -9.28     | -6.99       | -9.14  |
| DAMD       | DEE         | -                       | -12.86     | -6.77     | -2.99       | -4.09  |
| DAMD       | CHCL3       | -                       | -14.07     | -11.27    | -4.68       | -5.54  |
| DAMD       | DEAN        | -                       | -11.10     | -7.82     | -7.24       | -6.29  |
| DAMD       | TEAN        | -                       | -9.76      | -7.40     | -3.18       | -6.27  |
| DAMD       | TOL         | -                       | -12.24     | -9.53     | -5.73       | -6.05  |
| DAMD       | BZN         | -                       | -13.16     | -7.65     | -5.32       | -5.18  |
| DAMD       | HPE         | -                       | -9.32      | -3.75     | -3.27       | -2.76  |
| DAMD       | HXE         | -                       | -7.28      | -1.88     | -1.79       | -0.93  |
| DAMD       | CCL4        | -                       | -7.41      | -         | -1.96       | -1.72  |
| DAMD       | CHE         | -                       | -6.56      | -2.67     | -1.91       | -1.17  |
| PPN        | DAMD        | -                       | -2.64      | -1.91     | -0.31       | -0.48  |
| PPN        | PPN         | -1.32                   | -2.02      | -2.31     | -0.11       | -0.76  |
| PPN        | BTN         | -1.39                   | -2.52      | -2.38     | -0.38       | -0.68  |
| PPN        | PYRI        | -                       | -1.78      | -2.30     | -0.55       | -1.20  |
| PPN        | H2O         | 5.88                    | 1.86       | -0.30     | 2.42        | 1.67   |
| PPN        | C2CL2       | -                       | -1.96      | -3.37     | -0.43       | -1.15  |
| PPN        | EAE         | -1.81                   | -2.23      | -2.24     | -0.49       | -0.55  |
| PPN        | PTL         | -0.82                   | -4.09      | -3.87     | -0.48       | -4.93  |
| PPN        | MTL         | 0.81                    | -2.42      | -2.68     | -1.39       | -4.87  |
| PPN        | ETL         | 0.38                    | -1.94      | -3.19     | -2.10       | -4.45  |
| PPN        | BTL         | 0.10                    | -1.35      | -3.45     | -0.94       | -3.73  |
| PPN        | 2M2P        | -1.68                   | -4.42      | -4.36     | -2.60       | -5.21  |
| PPN        | 1PL         | -1.62                   | -3.10      | -4.71     | -2.32       | -4.86  |
| PPN        | 2PL         | -1.02                   | -2.87      | -3.80     | -2.23       | -4.93  |
| PPN        | ANLN        | -1.64                   | -6.21      | -3.31     | -2.78       | -2.74  |
| PPN        | DEE         | -1.03                   | -3.04      | -2.83     | -0.03       | -0.34  |
| PPN        | CHCL3       | 0.41                    | -3.00      | -6.95     | -1.90       | -2.08  |
| PPN        | DEAN        | -4.39                   | -3.48      | -4.60     | -3.80       | -3.25  |
| PPN        | TEAN        | -2.29                   | 0.48       | -1.24     | 1.78        | -0.66  |
| PPN        | TOL         | -1.71                   | -0.79      | -2.43     | -0.07       | -0.60  |
| PPN        | BZN         | -1.25                   | -1.64      | -1.77     | -0.51       | -0.12  |

Table S.3 – Continued on next page

Table S.3 – Continued from previous page

| Solute (A) | Solvent (B) | GROMOS-54A7             | GROMOS-ATB | OPLS-LBCC | AMBER-GAFF2 | OpenFF |
|------------|-------------|-------------------------|------------|-----------|-------------|--------|
|            |             | [kJ·mol <sup>-1</sup> ] |            |           |             |        |
| PPN        | HPE         | -1.87                   | -0.14      | 0.66      | 1.38        | 1.39   |
| PPN        | HXE         | -2.17                   | -0.03      | 0.69      | 0.76        | 0.98   |
| PPN        | CCL4        | 0.15                    | 2.84       | -         | 2.53        | 2.48   |
| PPN        | CHE         | -2.41                   | -0.41      | 0.50      | 1.44        | 1.41   |
| BTN        | DAMD        | -                       | 0.15       | -1.04     | -1.31       | -0.27  |
| BTN        | PPN         | -1.50                   | -1.60      | -2.09     | -0.93       | -0.89  |
| BTN        | BTN         | -1.45                   | -1.27      | -1.95     | -1.15       | -0.94  |
| BTN        | PYRI        | -                       | -1.16      | -1.08     | -1.11       | -0.71  |
| BTN        | H2O         | 5.69                    | 3.63       | -0.48     | 1.76        | 1.30   |
| BTN        | C2CL2       | -                       | -1.09      | -1.92     | -0.66       | -1.11  |
| BTN        | EAE         | -2.10                   | -1.15      | -2.07     | -1.19       | -1.13  |
| BTN        | PTL         | -1.20                   | -2.26      | -3.39     | -1.93       | -5.15  |
| BTN        | MTL         | 1.41                    | -0.37      | -1.62     | -1.55       | -4.79  |
| BTN        | ETL         | 0.62                    | -0.89      | -2.75     | -2.92       | -4.51  |
| BTN        | BTL         | -0.26                   | 0.40       | -3.34     | -0.50       | -4.51  |
| BTN        | 2M2P        | -0.61                   | -2.61      | -2.69     | -2.50       | -4.55  |
| BTN        | 1PL         | 0.36                    | -1.22      | -3.34     | -1.58       | -5.11  |
| BTN        | 2PL         | -0.32                   | 0.20       | -2.77     | -2.05       | -5.10  |
| BTN        | ANLN        | 1.87                    | -4.06      | -1.94     | -1.80       | -1.88  |
| BTN        | DEE         | -1.27                   | -1.65      | -2.17     | -0.67       | -0.67  |
| BTN        | CHCL3       | 1.31                    | -0.41      | -5.53     | -1.92       | -1.24  |
| BTN        | DEAN        | -2.67                   | -1.56      | -2.80     | -3.04       | -1.26  |
| BTN        | TEAN        | -1.82                   | 1.05       | -1.06     | 1.16        | -0.95  |
| BTN        | TOL         | -1.45                   | -1.17      | -1.37     | -0.64       | -0.87  |
| BTN        | BZN         | -1.29                   | -1.16      | -1.37     | -0.95       | -0.50  |
| BTN        | HPE         | -1.88                   | 0.60       | 1.16      | 0.94        | 1.05   |
| BTN        | HXE         | -1.14                   | 0.15       | 1.15      | 0.81        | 1.36   |
| BTN        | CCL4        | 0.43                    | 2.57       | -         | 1.60        | 1.93   |
| BTN        | CHE         | -1.98                   | 0.32       | 0.58      | 0.44        | 0.95   |
| PYRI       | DAMD        | -                       | -0.65      | -3.62     | 2.97        | 1.96   |
| PYRI       | PPN         | -                       | -1.96      | -4.48     | 0.79        | 0.27   |
| PYRI       | BTN         | -                       | -2.33      | -4.59     | 1.11        | 0.26   |
| PYRI       | PYRI        | -                       | -2.01      | -4.34     | 1.79        | 0.53   |
| PYRI       | H2O         | -                       | 1.18       | 0.30      | 7.40        | 5.27   |
| PYRI       | C2CL2       | -                       | -1.33      | -5.21     | 1.13        | 0.29   |
| PYRI       | EAE         | -                       | 3.23       | 1.75      | 7.03        | 5.57   |
| PYRI       | PTL         | -                       | -2.78      | -4.09     | 1.75        | -2.46  |
| PYRI       | MTL         | -                       | 1.35       | -0.82     | 5.02        | 0.48   |
| PYRI       | ETL         | -                       | 0.69       | -2.24     | 3.38        | 0.19   |
| PYRI       | BTL         | -                       | 0.36       | -1.71     | 4.20        | 0.47   |
| PYRI       | 2M2P        | -                       | -1.95      | -3.81     | 2.27        | -0.72  |
| PYRI       | 1PL         | -                       | -0.08      | -2.62     | 3.67        | -0.07  |
| PYRI       | 2PL         | -                       | -1.81      | -3.18     | 4.08        | -1.17  |
| PYRI       | ANLN        | -                       | 15.48      | 10.80     | 17.18       | 16.36  |
| PYRI       | DEE         | -                       | 6.34       | 6.08      | 11.59       | 9.99   |
| PYRI       | CHCL3       | -                       | -0.37      | -4.44     | 3.28        | 2.25   |
| PYRI       | DEAN        | -                       | -3.60      | -5.59     | -1.34       | -2.36  |
| PYRI       | TEAN        | -                       | -0.90      | -2.04     | 3.74        | 0.91   |
| PYRI       | TOL         | -                       | -2.19      | -4.08     | 1.83        | 0.82   |
| PYRI       | BZN         | -                       | -2.96      | -3.64     | 0.67        | 0.75   |
| PYRI       | HPE         | -                       | -2.18      | -0.32     | 2.56        | 1.73   |

Table S.3 – Continued on next page

Table S.3 – Continued from previous page

| Solute (A)              | Solvent (B) | GROMOS-54A7 | GROMOS-ATB | OPLS-LBCC | AMBER-GAFF2 | OpenFF |
|-------------------------|-------------|-------------|------------|-----------|-------------|--------|
| [kJ·mol <sup>-1</sup> ] |             |             |            |           |             |        |
| PYRI                    | HXE         | -           | -3.37      | -2.03     | 0.74        | 0.14   |
| PYRI                    | CCL4        | -           | -0.39      | -         | 3.97        | 2.95   |
| PYRI                    | CHE         | -           | -1.46      | -1.53     | 2.30        | 1.05   |
| H2O                     | DAMD        | -           | 5.21       | 5.98      | 4.48        | 1.47   |
| H2O                     | PPN         | 2.50        | -0.54      | -2.40     | -2.16       | -2.61  |
| H2O                     | BTN         | -0.24       | -2.76      | -5.28     | -4.66       | -5.59  |
| H2O                     | PYRI        | -           | 2.20       | 4.14      | 4.91        | 3.02   |
| H2O                     | H2O         | -0.03       | 0.12       | 0.20      | 0.05        | 0.05   |
| H2O                     | C2CL2       | -           | 2.58       | -0.79     | 3.30        | 3.96   |
| H2O                     | EAE         | 1.46        | 2.58       | 1.60      | -1.27       | 0.04   |
| H2O                     | PTL         | 2.13        | 2.85       | 1.56      | 2.35        | 4.23   |
| H2O                     | MTL         | 0.37        | 1.89       | -0.30     | 1.05        | 2.89   |
| H2O                     | ETL         | 2.49        | 2.09       | -0.77     | 1.77        | 3.10   |
| H2O                     | BTL         | -1.81       | -1.21      | -2.69     | -0.67       | 0.66   |
| H2O                     | 2M2P        | 17.36       | 17.74      | 14.78     | 18.05       | 19.32  |
| H2O                     | 1PL         | 5.92        | 6.01       | 3.87      | 5.47        | 7.58   |
| H2O                     | 2PL         | 1.17        | 1.89       | -1.35     | 0.65        | 2.23   |
| H2O                     | ANLN        | -3.48       | -3.63      | -2.42     | -2.79       | -0.35  |
| H2O                     | DEE         | 2.36        | -2.96      | -9.14     | -1.01       | -3.24  |
| H2O                     | CHCL3       | 7.80        | 3.29       | -0.67     | 2.87        | 4.06   |
| H2O                     | DEAN        | 5.22        | 13.55      | 0.86      | 7.62        | 3.25   |
| H2O                     | TEAN        | 10.86       | 14.11      | 1.64      | 13.59       | 1.34   |
| H2O                     | TOL         | 3.06        | 3.62       | 0.26      | 2.75        | 1.35   |
| H2O                     | BZN         | -0.07       | 2.00       | 0.30      | -0.96       | 0.44   |
| H2O                     | HPE         | 4.49        | 4.43       | 4.00      | 5.31        | 4.89   |
| H2O                     | HXE         | 8.29        | 8.15       | 7.80      | 9.04        | 8.60   |
| H2O                     | CCL4        | 7.29        | 7.06       | -         | 6.91        | 7.37   |
| H2O                     | CHE         | 5.03        | 4.17       | 4.77      | 6.29        | 5.82   |
| C2CL2                   | DAMD        | -           | 3.98       | -5.11     | 2.06        | 2.04   |
| C2CL2                   | PPN         | -           | 1.16       | -7.10     | 0.53        | 0.79   |
| C2CL2                   | BTN         | -           | 1.86       | -6.05     | 1.23        | 1.25   |
| C2CL2                   | PYRI        | -           | -0.63      | -8.42     | -1.39       | -1.21  |
| C2CL2                   | H2O         | -           | 4.07       | -5.54     | 4.71        | 5.13   |
| C2CL2                   | C2CL2       | -           | 2.12       | -4.56     | 2.27        | 2.18   |
| C2CL2                   | EAE         | -           | 2.34       | -4.46     | 0.93        | 1.79   |
| C2CL2                   | PTL         | -           | 1.66       | -6.87     | 0.90        | 0.69   |
| C2CL2                   | MTL         | -           | 3.26       | -4.94     | 4.15        | 1.91   |
| C2CL2                   | ETL         | -           | 3.10       | -6.77     | 2.46        | 0.97   |
| C2CL2                   | BTL         | -           | 2.23       | -7.34     | 1.45        | 0.89   |
| C2CL2                   | 2M2P        | -           | -2.63      | -12.98    | -2.43       | -3.41  |
| C2CL2                   | 1PL         | -           | 1.51       | -8.41     | 1.37        | 0.40   |
| C2CL2                   | 2PL         | -           | 2.89       | -7.17     | 2.72        | 2.28   |
| C2CL2                   | ANLN        | -           | -0.07      | -6.66     | -0.30       | 0.31   |
| C2CL2                   | DEE         | -           | 1.82       | -4.89     | 1.38        | 0.57   |
| C2CL2                   | CHCL3       | -           | 0.61       | -6.79     | 1.04        | 0.92   |
| C2CL2                   | DEAN        | -           | 3.41       | -6.04     | 1.84        | 0.38   |
| C2CL2                   | TEAN        | -           | -1.17      | -7.58     | -2.00       | -4.48  |
| C2CL2                   | TOL         | -           | 1.78       | -4.63     | -0.01       | 0.66   |
| C2CL2                   | BZN         | -           | 1.52       | -3.42     | 0.18        | 1.23   |
| C2CL2                   | HPE         | -           | 3.30       | 2.50      | 2.81        | 3.38   |
| C2CL2                   | HXE         | -           | 1.72       | 1.02      | 0.99        | 1.52   |

Table S.3 – Continued on next page

Table S.3 – Continued from previous page

| Solute (A)              | Solvent (B) | GROMOS-54A7 | GROMOS-ATB | OPLS-LBCC | AMBER-GAFF2 | OpenFF |
|-------------------------|-------------|-------------|------------|-----------|-------------|--------|
| [kJ·mol <sup>-1</sup> ] |             |             |            |           |             |        |
| C2CL2                   | CCL4        | -           | 5.55       | -         | 4.84        | 4.91   |
| C2CL2                   | CHE         | -           | 2.54       | 1.27      | 1.58        | 1.43   |
| EAE                     | DAMD        | -           | -5.54      | -4.51     | -3.26       | -5.74  |
| EAE                     | PPN         | -9.47       | -3.31      | -3.46     | -1.54       | -3.81  |
| EAE                     | BTN         | -9.52       | -4.13      | -3.60     | -2.21       | -4.08  |
| EAE                     | PYRI        | -           | -3.55      | -1.64     | -1.10       | -3.94  |
| EAE                     | H2O         | -5.69       | 0.22       | -1.29     | -2.15       | -3.28  |
| EAE                     | C2CL2       | -           | -4.23      | -2.77     | -2.44       | -4.50  |
| EAE                     | EAE         | -9.95       | -4.44      | -3.80     | -2.05       | -4.74  |
| EAE                     | PTL         | -11.66      | -5.15      | -5.28     | -4.44       | -8.58  |
| EAE                     | MTL         | -9.79       | -4.44      | -3.97     | -4.62       | -9.35  |
| EAE                     | ETL         | -8.52       | -4.70      | -4.45     | -5.68       | -8.81  |
| EAE                     | BTL         | -9.40       | -5.50      | -4.91     | -4.71       | -8.82  |
| EAE                     | 2M2P        | -4.95       | -1.49      | -1.67     | -2.41       | -4.55  |
| EAE                     | 1PL         | -7.76       | -5.74      | -5.01     | -4.09       | -8.39  |
| EAE                     | 2PL         | -11.29      | -4.63      | -4.80     | -5.27       | -8.98  |
| EAE                     | ANLN        | -12.28      | -10.20     | -6.29     | -5.35       | -8.25  |
| EAE                     | DEE         | -7.31       | -5.54      | -4.04     | -1.82       | -4.38  |
| EAE                     | CHCL3       | -4.73       | -4.53      | -4.93     | -3.26       | -4.58  |
| EAE                     | DEAN        | -12.13      | -6.58      | -5.99     | -6.14       | -6.81  |
| EAE                     | TEAN        | -2.44       | 1.11       | 1.48      | 3.95        | 0.18   |
| EAE                     | TOL         | -8.16       | -4.51      | -4.27     | -1.75       | -4.45  |
| EAE                     | BZN         | -8.68       | -4.47      | -4.08     | -2.61       | -4.65  |
| EAE                     | HPE         | -5.65       | -3.15      | -1.28     | -0.76       | -2.84  |
| EAE                     | HXE         | -4.66       | -3.14      | -1.01     | -0.48       | -2.28  |
| EAE                     | CCL4        | -3.44       | -1.68      | -         | 0.26        | -1.67  |
| EAE                     | CHE         | -6.25       | -3.90      | -2.47     | -1.20       | -3.03  |
| PTL                     | DAMD        | -           | 3.79       | 4.42      | -3.55       | -1.99  |
| PTL                     | PPN         | -4.00       | 1.26       | 0.60      | -3.81       | -2.33  |
| PTL                     | BTN         | -5.11       | -0.04      | -0.75     | -4.93       | -3.86  |
| PTL                     | PYRI        | -           | 2.40       | 4.03      | 0.11        | -0.02  |
| PTL                     | H2O         | -2.83       | 6.29       | 0.51      | -0.13       | 6.78   |
| PTL                     | C2CL2       | -           | 1.99       | 0.83      | -0.12       | 0.58   |
| PTL                     | EAE         | -7.61       | -1.07      | -0.93     | -7.35       | -4.19  |
| PTL                     | PTL         | -1.56       | 3.78       | 5.36      | 0.52        | 4.20   |
| PTL                     | MTL         | -6.13       | 2.67       | 2.71      | -2.16       | 1.17   |
| PTL                     | ETL         | -6.13       | 2.69       | 2.67      | -2.32       | 1.66   |
| PTL                     | BTL         | -6.08       | 2.02       | 3.41      | -2.13       | 1.92   |
| PTL                     | 2M2P        | -2.87       | -1.53      | 3.71      | -0.99       | 2.79   |
| PTL                     | 1PL         | -5.11       | 2.75       | 2.91      | -2.48       | 2.00   |
| PTL                     | 2PL         | -5.65       | 2.29       | 2.74      | -1.10       | 1.93   |
| PTL                     | ANLN        | -1.86       | 3.03       | 3.69      | 1.20        | 5.15   |
| PTL                     | DEE         | 2.97        | 3.32       | 3.18      | 2.88        | 1.34   |
| PTL                     | CHCL3       | 1.44        | 0.77       | -3.47     | -1.59       | -0.13  |
| PTL                     | DEAN        | -7.40       | 2.65       | -1.07     | -3.39       | -5.60  |
| PTL                     | TEAN        | 0.77        | 5.28       | 2.26      | 4.62        | -3.70  |
| PTL                     | TOL         | -2.50       | 0.34       | 0.07      | -1.10       | -1.58  |
| PTL                     | BZN         | -4.69       | -1.40      | -0.51     | -3.50       | -2.32  |
| PTL                     | HPE         | -0.65       | 0.57       | 1.53      | 0.72        | -0.69  |
| PTL                     | HXE         | -0.08       | 1.35       | 2.26      | 1.24        | 0.10   |
| PTL                     | CCL4        | 0.28        | 2.47       | -         | 0.61        | -1.16  |

Table S.3 – Continued on next page

Table S.3 – Continued from previous page

| Solute (A)              | Solvent (B) | GROMOS-54A7 | GROMOS-ATB | OPLS-LBCC | AMBER-GAFF2 | OpenFF |
|-------------------------|-------------|-------------|------------|-----------|-------------|--------|
| [kJ·mol <sup>-1</sup> ] |             |             |            |           |             |        |
| PTL                     | CHE         | -4.20       | -1.55      | -0.96     | -0.77       | -3.17  |
| MTL                     | DAMD        | -           | 5.38       | 5.03      | 3.04        | 1.87   |
| MTL                     | PPN         | -0.14       | 3.91       | 2.19      | 1.80        | 1.91   |
| MTL                     | BTN         | -0.51       | 3.30       | 1.77      | 1.29        | 1.07   |
| MTL                     | PYRI        | -           | 6.25       | 5.67      | 6.59        | 5.18   |
| MTL                     | H2O         | -1.28       | 6.41       | 1.64      | 3.95        | 8.39   |
| MTL                     | C2CL2       | -           | 0.79       | -2.39     | 2.00        | 1.29   |
| MTL                     | EAE         | -4.06       | 2.67       | 1.82      | -0.87       | 0.55   |
| MTL                     | PTL         | -5.59       | 3.87       | 2.78      | 2.68        | 5.49   |
| MTL                     | MTL         | -5.55       | 3.89       | 2.15      | 2.54        | 5.18   |
| MTL                     | ETL         | -5.50       | 4.17       | 1.90      | 2.41        | 5.04   |
| MTL                     | BTL         | -6.83       | 3.90       | 2.05      | 2.20        | 4.63   |
| MTL                     | 2M2P        | -2.82       | 2.96       | 3.42      | 4.13        | 5.67   |
| MTL                     | 1PL         | -5.08       | 2.86       | 1.45      | 0.84        | 4.27   |
| MTL                     | 2PL         | -5.65       | 4.28       | 2.82      | 2.25        | 5.13   |
| MTL                     | ANLN        | -9.12       | 1.80       | 0.15      | -0.30       | 2.46   |
| MTL                     | DEE         | 5.17        | 4.57       | 1.94      | 6.40        | 3.44   |
| MTL                     | CHCL3       | 4.65        | 3.84       | -1.45     | 4.84        | 4.20   |
| MTL                     | DEAN        | -7.70       | 6.46       | -0.49     | 1.49        | -2.16  |
| MTL                     | TEAN        | 5.57        | 11.27      | 5.08      | 12.13       | 1.26   |
| MTL                     | TOL         | -2.22       | 1.66       | -0.61     | 2.09        | -0.18  |
| MTL                     | BZN         | -2.75       | 1.88       | 0.68      | 1.02        | 0.68   |
| MTL                     | HPE         | 1.10        | 2.69       | 2.25      | 4.71        | 1.80   |
| MTL                     | HXE         | 1.41        | 3.11       | 2.70      | 5.05        | 2.16   |
| MTL                     | CCL4        | 4.21        | 5.85       | -         | 7.25        | 4.65   |
| MTL                     | CHE         | 0.65        | 2.67       | 2.48      | 5.34        | 1.89   |
| ETL                     | DAMD        | -           | 4.48       | 4.12      | 1.89        | 0.39   |
| ETL                     | PPN         | -1.43       | 1.71       | 0.79      | 0.15        | 0.11   |
| ETL                     | BTN         | -0.70       | 2.21       | 1.22      | 0.45        | 0.14   |
| ETL                     | PYRI        | -           | 4.97       | 5.54      | 6.06        | 3.81   |
| ETL                     | H2O         | -0.75       | 4.49       | 0.72      | 5.37        | 8.08   |
| ETL                     | C2CL2       | -           | 1.37       | -2.13     | 1.75        | 0.94   |
| ETL                     | EAE         | -4.23       | 1.28       | 1.05      | -1.77       | -0.17  |
| ETL                     | PTL         | -5.95       | 1.06       | 2.00      | 1.77        | 3.50   |
| ETL                     | MTL         | -4.55       | 1.60       | 1.03      | 2.52        | 3.72   |
| ETL                     | ETL         | -5.24       | 1.52       | 1.23      | 1.97        | 3.28   |
| ETL                     | BTL         | -2.79       | 0.65       | 1.93      | 2.05        | 3.68   |
| ETL                     | 2M2P        | -2.19       | -2.63      | 2.37      | 2.50        | 4.15   |
| ETL                     | 1PL         | -6.37       | 1.54       | 1.26      | 1.38        | 3.57   |
| ETL                     | 2PL         | -5.07       | 1.30       | 1.63      | 2.48        | 3.44   |
| ETL                     | ANLN        | -7.25       | 1.04       | -0.71     | 1.02        | 0.30   |
| ETL                     | DEE         | -0.73       | -1.96      | -3.66     | -0.16       | -2.74  |
| ETL                     | CHCL3       | 3.99        | 3.28       | -2.44     | 3.41        | 2.93   |
| ETL                     | DEAN        | -2.45       | 8.88       | 2.87      | 4.70        | 1.18   |
| ETL                     | TEAN        | 5.62        | 10.16      | 4.60      | 10.44       | 0.51   |
| ETL                     | TOL         | -0.09       | 2.56       | 0.58      | 2.85        | 0.77   |
| ETL                     | BZN         | -1.96       | 1.86       | 0.86      | 1.30        | 1.07   |
| ETL                     | HPE         | 1.13        | 2.95       | 2.35      | 3.80        | 1.51   |
| ETL                     | HXE         | 2.81        | 4.12       | 3.97      | 5.08        | 2.93   |
| ETL                     | CCL4        | 3.39        | 5.38       | -         | 5.43        | 3.04   |
| ETL                     | CHE         | 2.57        | 3.95       | 3.88      | 5.42        | 2.76   |

Table S.3 – Continued on next page



Table S.3 – Continued from previous page

| Solute (A)              | Solvent (B) | GROMOS-54A7 | GROMOS-ATB | OPLS-LBCC | AMBER-GAFF2 | OpenFF |
|-------------------------|-------------|-------------|------------|-----------|-------------|--------|
| [kJ·mol <sup>-1</sup> ] |             |             |            |           |             |        |
| BTL                     | DAMD        | -           | 1.03       | 5.10      | -2.17       | -1.16  |
| BTL                     | PPN         | -2.08       | 0.48       | 2.26      | -2.04       | -0.17  |
| BTL                     | BTN         | -1.85       | 0.12       | 2.45      | -2.24       | -0.46  |
| BTL                     | PYRI        | -           | 1.92       | 6.22      | 2.37        | 3.07   |
| BTL                     | H2O         | -2.06       | 1.10       | 1.40      | -0.46       | 7.43   |
| BTL                     | C2CL2       | -           | 0.17       | -0.05     | 0.06        | 0.67   |
| BTL                     | EAE         | -4.20       | 0.01       | 2.26      | -3.93       | -1.14  |
| BTL                     | PTL         | -4.04       | -1.10      | 3.93      | -3.14       | 3.14   |
| BTL                     | MTL         | -5.97       | -1.72      | 2.65      | -2.04       | 2.16   |
| BTL                     | ETL         | -5.30       | -1.46      | 3.62      | -1.44       | 3.10   |
| BTL                     | BTL         | -6.38       | -2.42      | 3.45      | -2.70       | 2.49   |
| BTL                     | 2M2P        | -2.68       | -1.16      | 3.56      | -1.72       | 3.25   |
| BTL                     | 1PL         | -5.47       | -2.20      | 2.64      | -2.15       | 2.38   |
| BTL                     | 2PL         | -5.08       | -4.16      | 3.99      | -1.54       | 3.11   |
| BTL                     | ANLN        | -10.31      | -1.43      | 0.37      | -3.19       | 2.37   |
| BTL                     | DEE         | -0.27       | -2.53      | -1.37     | -0.61       | -2.49  |
| BTL                     | CHCL3       | 1.76        | 1.05       | -2.93     | -0.39       | 0.33   |
| BTL                     | DEAN        | -6.73       | 3.76       | 1.22      | -1.69       | -2.78  |
| BTL                     | TEAN        | 2.40        | 6.39       | 3.35      | 6.35        | -2.46  |
| BTL                     | TOL         | -2.22       | -1.04      | -0.39     | -0.90       | -1.52  |
| BTL                     | BZN         | -4.44       | -1.70      | -0.30     | -2.39       | -1.15  |
| BTL                     | HPE         | 0.87        | 1.81       | 2.18      | 2.26        | 0.68   |
| BTL                     | HXE         | 0.77        | 2.27       | 2.64      | 2.38        | 0.73   |
| BTL                     | CCL4        | 2.29        | 3.79       | -         | 2.39        | 0.71   |
| BTL                     | CHE         | -0.82       | 1.08       | 1.68      | 1.72        | -0.53  |
| 2M2P                    | DAMD        | -           | -7.71      | 2.14      | -4.37       | -3.73  |
| 2M2P                    | PPN         | 1.07        | -5.76      | -0.03     | -3.36       | -2.33  |
| 2M2P                    | BTN         | 1.55        | -5.66      | 0.32      | -3.41       | -2.49  |
| 2M2P                    | PYRI        | -           | -4.33      | 2.73      | 1.10        | 0.30   |
| 2M2P                    | H2O         | 5.84        | -3.03      | -0.90     | 2.32        | 5.89   |
| 2M2P                    | C2CL2       | -           | -0.18      | 2.68      | 3.55        | 3.18   |
| 2M2P                    | EAE         | 2.34        | -4.74      | 1.41      | -3.49       | -1.16  |
| 2M2P                    | PTL         | -0.80       | -9.86      | 0.16      | -3.39       | -0.19  |
| 2M2P                    | MTL         | 2.07        | -5.46      | 1.95      | 0.11        | 1.15   |
| 2M2P                    | ETL         | 0.33        | -7.72      | 1.80      | -2.03       | 0.96   |
| 2M2P                    | BTL         | 2.21        | -9.94      | 0.39      | -3.69       | -0.43  |
| 2M2P                    | 2M2P        | 0.64        | -14.67     | -0.57     | -2.30       | -0.29  |
| 2M2P                    | 1PL         | 2.21        | -7.95      | 0.69      | -2.34       | 0.34   |
| 2M2P                    | 2PL         | 3.70        | -10.51     | 1.01      | -1.45       | 0.22   |
| 2M2P                    | ANLN        | -2.76       | -7.79      | -1.71     | 0.08        | -1.00  |
| 2M2P                    | DEE         | 3.83        | -6.08      | -0.28     | -0.02       | -1.26  |
| 2M2P                    | CHCL3       | 4.18        | -5.42      | -6.25     | -2.08       | -1.85  |
| 2M2P                    | DEAN        | -0.07       | -1.90      | 0.30      | -0.64       | -2.70  |
| 2M2P                    | TEAN        | 6.02        | 0.63       | 3.42      | 5.35        | -0.66  |
| 2M2P                    | TOL         | 0.28        | -6.25      | -1.83     | -1.39       | -2.64  |
| 2M2P                    | BZN         | -1.25       | -6.60      | -2.34     | -3.46       | -2.99  |
| 2M2P                    | HPE         | 2.47        | -3.62      | 0.24      | 0.45        | -0.81  |
| 2M2P                    | HXE         | 2.15        | -3.41      | 0.43      | 0.08        | -1.01  |
| 2M2P                    | CCL4        | 3.36        | -3.92      | -         | -0.25       | -1.97  |
| 2M2P                    | CHE         | 1.58        | -4.20      | -0.65     | -0.64       | -1.77  |
| 1PL                     | DAMD        | -           | 4.66       | 4.73      | -1.41       | -0.76  |

Table S.3 – Continued on next page

Table S.3 – Continued from previous page

| Solute (A)              | Solvent (B) | GROMOS-54A7 | GROMOS-ATB | OPLS-LBCC | AMBER-GAFF2 | OpenFF |
|-------------------------|-------------|-------------|------------|-----------|-------------|--------|
| [kJ·mol <sup>-1</sup> ] |             |             |            |           |             |        |
| 1PL                     | PPN         | -1.94       | 2.62       | 2.01      | -1.53       | -0.20  |
| 1PL                     | BTN         | -1.25       | 2.88       | 2.09      | -0.96       | -0.29  |
| 1PL                     | PYRI        | -           | 5.59       | 6.23      | 3.60        | 3.13   |
| 1PL                     | H2O         | -0.77       | 7.39       | 1.61      | 0.21        | 7.88   |
| 1PL                     | C2CL2       | -           | 1.33       | -1.46     | -0.51       | -0.04  |
| 1PL                     | EAE         | -3.90       | 2.95       | 2.11      | -2.99       | -0.55  |
| 1PL                     | PTL         | -7.54       | 4.35       | 4.67      | -0.29       | 3.26   |
| 1PL                     | MTL         | -4.23       | 4.83       | 3.74      | -0.50       | 3.59   |
| 1PL                     | ETL         | -4.90       | 3.57       | 3.30      | -0.43       | 3.54   |
| 1PL                     | BTL         | -4.40       | 3.42       | 2.66      | -2.34       | 2.23   |
| 1PL                     | 2M2P        | -5.46       | 1.02       | 2.22      | -3.10       | 2.11   |
| 1PL                     | 1PL         | -5.52       | 3.47       | 3.26      | -2.26       | 3.02   |
| 1PL                     | 2PL         | -5.13       | 3.73       | 3.74      | -0.41       | 3.19   |
| 1PL                     | ANLN        | -6.81       | 0.99       | 0.56      | -4.60       | 1.50   |
| 1PL                     | DEE         | 0.70        | 0.49       | -0.70     | 0.79        | -1.31  |
| 1PL                     | CHCL3       | 2.21        | 1.53       | -3.53     | -0.55       | 1.07   |
| 1PL                     | DEAN        | -7.28       | 4.30       | -0.42     | -1.91       | -4.26  |
| 1PL                     | TEAN        | 3.70        | 9.27       | 4.72      | 8.15        | -0.93  |
| 1PL                     | TOL         | -1.64       | 1.82       | 0.34      | 0.62        | -0.65  |
| 1PL                     | BZN         | -2.89       | 0.45       | 0.77      | -1.02       | -0.43  |
| 1PL                     | HPE         | 1.37        | 2.53       | 2.61      | 3.53        | 1.73   |
| 1PL                     | HXE         | 0.42        | 2.09       | 2.12      | 2.20        | 0.28   |
| 1PL                     | CCL4        | 2.89        | 5.25       | -         | 3.52        | 2.36   |
| 1PL                     | CHE         | -0.50       | 1.29       | 1.28      | 2.35        | -0.17  |
| 2PL                     | DAMD        | -           | -4.56      | 3.88      | -0.43       | -0.83  |
| 2PL                     | PPN         | -0.26       | -4.30      | -0.09     | -1.85       | -0.94  |
| 2PL                     | BTN         | 0.58        | -4.16      | 0.34      | -1.14       | -0.96  |
| 2PL                     | PYRI        | -           | -2.82      | 3.39      | 2.58        | 2.09   |
| 2PL                     | H2O         | 2.53        | -2.07      | -0.25     | 1.78        | 7.11   |
| 2PL                     | C2CL2       | -           | 0.25       | 2.42      | 4.40        | 4.19   |
| 2PL                     | EAE         | -2.41       | -6.09      | -0.53     | -4.32       | -2.45  |
| 2PL                     | PTL         | -3.09       | -6.35      | 0.98      | -0.79       | 2.07   |
| 2PL                     | MTL         | -4.89       | -7.87      | -1.30     | -3.23       | -0.25  |
| 2PL                     | ETL         | -2.08       | -6.02      | 0.41      | -1.17       | 1.57   |
| 2PL                     | BTL         | -4.64       | -5.66      | 0.39      | -1.68       | 1.73   |
| 2PL                     | 2M2P        | -3.38       | -5.55      | -0.25     | -1.62       | 1.45   |
| 2PL                     | 1PL         | -4.40       | -6.96      | -0.21     | -2.02       | 1.05   |
| 2PL                     | 2PL         | -1.02       | -9.85      | -0.40     | -2.28       | 0.27   |
| 2PL                     | ANLN        | -4.27       | -3.33      | 2.00      | 0.59        | 3.40   |
| 2PL                     | DEE         | 5.06        | -3.04      | 1.24      | 3.41        | 1.49   |
| 2PL                     | CHCL3       | 4.66        | -2.96      | -4.16     | -0.01       | 0.29   |
| 2PL                     | DEAN        | -4.46       | -2.47      | -2.34     | -1.82       | -4.47  |
| 2PL                     | TEAN        | 6.02        | 3.14       | 3.41      | 7.72        | -0.34  |
| 2PL                     | TOL         | 0.09        | -2.99      | -0.74     | 0.33        | -1.05  |
| 2PL                     | BZN         | -1.33       | -4.16      | -0.99     | -1.89       | -1.91  |
| 2PL                     | HPE         | 0.70        | -2.40      | 0.40      | 1.50        | -0.51  |
| 2PL                     | HXE         | 0.94        | -2.27      | 0.55      | 1.27        | -0.43  |
| 2PL                     | CCL4        | 2.57        | -1.18      | -         | 1.96        | 0.19   |
| 2PL                     | CHE         | 0.27        | -3.00      | -0.24     | 0.55        | -1.55  |
| ANLN                    | DAMD        | -           | -1.39      | -0.75     | -9.37       | -6.46  |
| ANLN                    | PPN         | -0.83       | 2.50       | 2.71      | -3.23       | 0.59   |

Table S.3 – Continued on next page

Table S.3 – Continued from previous page

| Solute (A)              | Solvent (B) | GROMOS-54A7 | GROMOS-ATB | OPLS-LBCC | AMBER-GAFF2 | OpenFF |
|-------------------------|-------------|-------------|------------|-----------|-------------|--------|
| [kJ·mol <sup>-1</sup> ] |             |             |            |           |             |        |
| ANLN                    | BTN         | -2.97       | -0.25      | -0.06     | -6.00       | -2.26  |
| ANLN                    | PYRI        | -           | 1.28       | -2.63     | -7.62       | -5.01  |
| ANLN                    | H2O         | -8.82       | 1.60       | 1.74      | -4.47       | 0.99   |
| ANLN                    | C2CL2       | -           | 5.91       | 1.64      | -0.36       | 3.22   |
| ANLN                    | EAE         | -5.39       | 1.37       | 1.98      | -5.58       | -1.17  |
| ANLN                    | PTL         | -5.97       | 2.44       | -0.32     | -3.36       | 0.30   |
| ANLN                    | MTL         | -7.82       | 5.41       | 2.13      | -0.90       | 0.81   |
| ANLN                    | ETL         | -6.16       | 6.32       | 1.48      | -0.79       | 1.24   |
| ANLN                    | BTL         | -8.26       | 4.53       | 0.21      | -2.43       | 0.17   |
| ANLN                    | 2M2P        | 2.34        | 9.18       | 6.36      | 5.81        | 8.31   |
| ANLN                    | 1PL         | -5.93       | 2.50       | -0.46     | -3.29       | -0.03  |
| ANLN                    | 2PL         | -1.30       | 7.46       | 3.29      | 1.56        | 3.47   |
| ANLN                    | ANLN        | -14.19      | 5.99       | 2.56      | -7.80       | 0.70   |
| ANLN                    | DEE         | 7.31        | 5.41       | 15.24     | 3.44        | 4.03   |
| ANLN                    | CHCL3       | 4.80        | 4.22       | -0.42     | -1.92       | 2.54   |
| ANLN                    | DEAN        | -7.46       | 3.98       | 9.17      | -4.49       | -3.78  |
| ANLN                    | TEAN        | -0.61       | 3.04       | -0.06     | -0.38       | -4.37  |
| ANLN                    | TOL         | -0.56       | 4.90       | 1.95      | -0.51       | 2.28   |
| ANLN                    | BZN         | -2.19       | 3.78       | 2.09      | -2.61       | 1.93   |
| ANLN                    | HPE         | 3.52        | 2.94       | 2.64      | 1.08        | 3.95   |
| ANLN                    | HXE         | 3.48        | 2.73       | 2.66      | 1.23        | 3.90   |
| ANLN                    | CCL4        | 6.18        | 5.24       | -         | 2.40        | 5.00   |
| ANLN                    | CHE         | 3.43        | 3.62       | 2.48      | 1.21        | 3.78   |
| DEE                     | DAMD        | -           | 0.09       | 2.60      | 1.37        | 0.69   |
| DEE                     | PPN         | 0.49        | 0.24       | 2.63      | 2.71        | 2.07   |
| DEE                     | BTN         | 0.29        | -0.44      | 1.93      | 2.35        | 1.42   |
| DEE                     | PYRI        | -           | -1.78      | 3.95      | 2.39        | 1.06   |
| DEE                     | H2O         | 10.44       | 3.71       | -0.51     | 8.54        | 5.08   |
| DEE                     | C2CL2       | -           | -3.00      | -0.06     | -0.83       | -2.35  |
| DEE                     | EAE         | 2.60        | 0.79       | 3.13      | 3.43        | 2.35   |
| DEE                     | PTL         | -1.62       | -2.72      | -0.88     | 0.27        | -2.14  |
| DEE                     | MTL         | 1.43        | -1.35      | 1.20      | 1.99        | -1.79  |
| DEE                     | ETL         | 3.07        | 1.66       | 3.50      | 4.27        | 1.33   |
| DEE                     | BTL         | -1.02       | -2.99      | -0.85     | 0.78        | -2.03  |
| DEE                     | 2M2P        | 0.37        | -1.70      | 1.56      | 1.18        | -0.36  |
| DEE                     | 1PL         | 1.58        | -0.68      | 2.00      | 2.89        | 0.03   |
| DEE                     | 2PL         | 0.69        | 0.08       | 2.20      | 1.95        | -0.13  |
| DEE                     | ANLN        | 5.27        | -1.14      | -0.08     | 4.63        | 3.04   |
| DEE                     | DEE         | -1.86       | -3.15      | -0.17     | -0.50       | -1.47  |
| DEE                     | CHCL3       | 0.59        | -3.00      | -2.15     | -0.18       | -1.30  |
| DEE                     | DEAN        | -0.52       | -2.35      | 0.55      | 0.30        | -0.67  |
| DEE                     | TEAN        | -0.66       | -1.06      | 1.66      | 1.55        | 0.06   |
| DEE                     | TOL         | -2.50       | -3.31      | -0.64     | -1.11       | -1.59  |
| DEE                     | BZN         | 1.34        | -1.25      | 2.95      | 3.25        | 1.57   |
| DEE                     | HPE         | -1.48       | -1.66      | 1.47      | 0.51        | -0.20  |
| DEE                     | HXE         | -1.29       | -1.31      | 1.99      | 0.85        | 0.28   |
| DEE                     | CCL4        | -1.77       | -1.39      | -         | -0.80       | -1.67  |
| DEE                     | CHE         | -3.41       | -3.38      | 0.06      | -0.76       | -1.87  |
| CHCL3                   | DAMD        | -           | -0.79      | -1.99     | 2.80        | 3.07   |
| CHCL3                   | PPN         | 1.81        | -1.64      | -4.77     | 1.36        | 1.35   |
| CHCL3                   | BTN         | 2.15        | -1.34      | -5.14     | 1.37        | 1.70   |

Table S.3 – Continued on next page

Table S.3 – Continued from previous page

| Solute (A) | Solvent (B) | GROMOS-54A7             | GROMOS-ATB | OPLS-LBCC | AMBER-GAFF2 | OpenFF |
|------------|-------------|-------------------------|------------|-----------|-------------|--------|
|            |             | [kJ·mol <sup>-1</sup> ] |            |           |             |        |
| CHCL3      | PYRI        | -                       | -1.70      | -2.77     | 2.56        | 2.27   |
| CHCL3      | H2O         | 6.75                    | -0.07      | -1.68     | 5.18        | 4.75   |
| CHCL3      | C2CL2       | -                       | -4.07      | -3.68     | 0.47        | -0.35  |
| CHCL3      | EAE         | 2.51                    | -3.17      | -3.43     | 0.63        | 1.11   |
| CHCL3      | PTL         | -0.32                   | -4.01      | -9.42     | -0.04       | -1.25  |
| CHCL3      | MTL         | 3.15                    | -0.43      | -2.92     | 3.42        | 1.78   |
| CHCL3      | ETL         | 1.95                    | -1.23      | -5.93     | 1.91        | 1.36   |
| CHCL3      | BTL         | 1.22                    | -3.18      | -7.20     | 0.92        | 0.48   |
| CHCL3      | 2M2P        | 9.30                    | 4.73       | -1.29     | 8.87        | 7.74   |
| CHCL3      | 1PL         | 1.65                    | -1.82      | -6.70     | 1.42        | 0.78   |
| CHCL3      | 2PL         | 4.24                    | -1.04      | -5.76     | 3.64        | 2.97   |
| CHCL3      | ANLN        | 0.65                    | -4.57      | -5.12     | 3.46        | 1.78   |
| CHCL3      | DEE         | -1.34                   | -5.84      | -8.52     | -1.21       | -2.33  |
| CHCL3      | CHCL3       | -0.56                   | -3.47      | -2.92     | 1.77        | 1.05   |
| CHCL3      | DEAN        | 1.79                    | -1.56      | -9.24     | 0.19        | -1.20  |
| CHCL3      | TEAN        | 6.86                    | 4.32       | -0.65     | 7.57        | 4.29   |
| CHCL3      | TOL         | -0.90                   | -5.09      | -6.47     | -1.15       | -1.55  |
| CHCL3      | BZN         | -4.32                   | -8.37      | -9.06     | -4.85       | -4.17  |
| CHCL3      | HPE         | -1.44                   | -2.23      | -1.35     | 0.55        | 0.13   |
| CHCL3      | HXE         | -2.54                   | -3.85      | -2.79     | -1.32       | -1.80  |
| CHCL3      | CCL4        | -0.33                   | -2.92      | -         | 2.27        | 1.64   |
| CHCL3      | CHE         | -0.76                   | -0.93      | -0.61     | 1.45        | 0.64   |
| DEAN       | DAMD        | -                       | -1.92      | -2.37     | -5.20       | -4.00  |
| DEAN       | PPN         | -3.40                   | -0.53      | -0.80     | -1.50       | -0.98  |
| DEAN       | BTN         | -4.59                   | -2.86      | -2.07     | -2.94       | -2.75  |
| DEAN       | PYRI        | -                       | 2.30       | 2.58      | 1.88        | 1.30   |
| DEAN       | H2O         | 7.83                    | 13.67      | 1.69      | 10.33       | 4.85   |
| DEAN       | C2CL2       | -                       | -0.06      | -0.93     | -1.40       | -2.69  |
| DEAN       | EAE         | -3.66                   | -2.13      | -1.50     | -2.29       | -1.25  |
| DEAN       | PTL         | 1.28                    | 3.46       | 1.94      | 3.94        | -1.94  |
| DEAN       | MTL         | 0.31                    | 6.55       | 3.28      | 4.58        | -2.58  |
| DEAN       | ETL         | -4.78                   | 1.69       | -0.82     | -0.50       | -6.01  |
| DEAN       | BTL         | -2.98                   | 4.23       | 1.82      | 3.30        | -2.40  |
| DEAN       | 2M2P        | 4.23                    | 4.08       | 5.56      | 6.64        | 2.27   |
| DEAN       | 1PL         | 0.25                    | 2.32       | 0.32      | 1.41        | -3.88  |
| DEAN       | 2PL         | -2.10                   | 1.86       | -0.58     | 1.95        | -3.83  |
| DEAN       | ANLN        | 5.13                    | 7.27       | 5.01      | 7.10        | 6.52   |
| DEAN       | DEE         | -2.21                   | -3.54      | -1.65     | -1.67       | -2.25  |
| DEAN       | CHCL3       | 3.53                    | 3.33       | -2.67     | 1.18        | -0.60  |
| DEAN       | DEAN        | -2.69                   | -0.97      | -0.27     | -0.18       | -1.05  |
| DEAN       | TEAN        | 0.98                    | 0.02       | 1.73      | 2.18        | 0.91   |
| DEAN       | TOL         | -3.02                   | -3.46      | -0.98     | -1.13       | -1.92  |
| DEAN       | BZN         | -2.97                   | -2.89      | -0.59     | 0.07        | -1.14  |
| DEAN       | HPE         | -1.02                   | -2.79      | -0.38     | -0.67       | -0.98  |
| DEAN       | HXE         | -0.07                   | -2.21      | 0.30      | 0.22        | -0.35  |
| DEAN       | CCL4        | 1.45                    | -1.67      | -         | 0.45        | -0.32  |
| DEAN       | CHE         | 0.03                    | -2.34      | 0.54      | 0.54        | -0.22  |
| TEAN       | DAMD        | -                       | -4.65      | 1.50      | -1.31       | -1.94  |
| TEAN       | PPN         | -3.74                   | -3.86      | -0.91     | -1.25       | -1.59  |
| TEAN       | BTN         | -5.10                   | -6.28      | -2.11     | -2.40       | -3.03  |
| TEAN       | PYRI        | -                       | -6.26      | 0.13      | -0.33       | -2.95  |

Table S.3 – Continued on next page

Table S.3 – Continued from previous page

| Solute (A)              | Solvent (B) | GROMOS-54A7 | GROMOS-ATB | OPLS-LBCC | AMBER-GAFF2 | OpenFF |
|-------------------------|-------------|-------------|------------|-----------|-------------|--------|
| [kJ·mol <sup>-1</sup> ] |             |             |            |           |             |        |
| TEAN                    | H2O         | 14.47       | 14.87      | 4.56      | 17.42       | 3.63   |
| TEAN                    | C2CL2       | -           | -5.44      | -0.76     | -3.16       | -4.65  |
| TEAN                    | EAE         | -3.82       | -6.83      | -2.66     | -2.34       | -3.18  |
| TEAN                    | PTL         | -0.47       | -2.81      | 0.98      | 1.05        | -4.52  |
| TEAN                    | MTL         | 4.88        | 2.09       | 5.16      | 6.38        | -3.84  |
| TEAN                    | ETL         | 1.22        | -0.78      | 2.09      | 1.91        | -5.13  |
| TEAN                    | BTL         | 0.22        | -1.89      | 0.61      | 1.76        | -4.46  |
| TEAN                    | 2M2P        | -2.12       | -8.06      | -0.90     | -1.68       | -3.03  |
| TEAN                    | 1PL         | -0.00       | -2.58      | 0.42      | 2.10        | -4.75  |
| TEAN                    | 2PL         | -1.27       | -3.38      | 0.23      | 0.08        | -4.96  |
| TEAN                    | ANLN        | 9.17        | 6.16       | 8.72      | 13.08       | 12.39  |
| TEAN                    | DEE         | -4.03       | -7.51      | -2.66     | -3.28       | -3.57  |
| TEAN                    | CHCL3       | -0.76       | -3.45      | -3.53     | -0.83       | -3.52  |
| TEAN                    | DEAN        | 0.09        | -5.17      | 0.41      | -0.37       | -0.10  |
| TEAN                    | TEAN        | -3.86       | -7.83      | -2.56     | -3.04       | -2.67  |
| TEAN                    | TOL         | -3.94       | -7.95      | -1.69     | -2.39       | -2.62  |
| TEAN                    | BZN         | -3.53       | -8.13      | -2.38     | -1.52       | -3.22  |
| TEAN                    | HPE         | -3.34       | -7.31      | -1.76     | -3.22       | -1.79  |
| TEAN                    | HXE         | -3.46       | -7.38      | -1.85     | -3.23       | -1.78  |
| TEAN                    | CCL4        | -4.15       | -7.46      | -         | -5.49       | -4.36  |
| TEAN                    | CHE         | -3.63       | -6.52      | -1.53     | -3.21       | -1.95  |
| TOL                     | DAMD        | -           | 0.79       | 0.94      | 0.67        | 3.11   |
| TOL                     | PPN         | -0.99       | -0.72      | -1.55     | 0.15        | 2.07   |
| TOL                     | BTN         | -0.48       | -0.51      | -0.47     | 0.68        | 2.29   |
| TOL                     | PYRI        | -           | -1.04      | 0.07      | 1.30        | 2.88   |
| TOL                     | H2O         | 0.31        | 1.51       | -3.70     | 0.47        | 0.05   |
| TOL                     | C2CL2       | -           | -0.01      | 0.04      | -0.76       | 1.47   |
| TOL                     | EAE         | 0.08        | -0.62      | -0.73     | 0.77        | 2.81   |
| TOL                     | PTL         | -0.37       | -2.20      | -1.86     | -0.20       | 0.45   |
| TOL                     | MTL         | 0.63        | 0.05       | 0.00      | 1.66        | -0.20  |
| TOL                     | ETL         | 0.41        | -0.18      | -0.42     | 0.63        | 0.46   |
| TOL                     | BTL         | -1.13       | -0.84      | -0.79     | 0.73        | 0.81   |
| TOL                     | 2M2P        | -0.73       | -1.36      | -1.89     | -0.22       | 1.10   |
| TOL                     | 1PL         | -0.28       | -0.70      | -1.48     | 0.38        | 1.03   |
| TOL                     | 2PL         | -0.59       | -1.19      | -1.22     | 0.09        | 0.82   |
| TOL                     | ANLN        | 0.43        | -1.33      | -1.99     | 3.22        | 1.88   |
| TOL                     | DEE         | -0.41       | -1.45      | -0.65     | 0.47        | 1.76   |
| TOL                     | CHCL3       | 0.36        | -1.07      | -4.50     | -1.83       | -0.02  |
| TOL                     | DEAN        | -1.26       | -2.65      | -1.69     | -1.31       | 0.36   |
| TOL                     | TEAN        | -0.09       | -1.46      | -0.59     | 0.73        | 2.16   |
| TOL                     | TOL         | 0.21        | -0.38      | -0.44     | 0.92        | 2.55   |
| TOL                     | BZN         | 0.22        | -0.51      | -0.50     | 1.34        | 2.65   |
| TOL                     | HPE         | -0.14       | -1.37      | 0.69      | 0.85        | 2.78   |
| TOL                     | HXE         | 0.50        | -1.07      | 1.00      | 0.63        | 2.84   |
| TOL                     | CCL4        | 1.28        | -0.27      | -         | 0.41        | 2.75   |
| TOL                     | CHE         | 0.26        | -1.05      | 0.80      | 0.76        | 2.70   |
| BZN                     | DAMD        | -           | 0.89       | 1.70      | 0.69        | 3.50   |
| BZN                     | PPN         | -0.39       | -0.01      | -0.39     | -0.26       | 2.22   |
| BZN                     | BTN         | 0.03        | 0.28       | -0.14     | 0.50        | 2.66   |
| BZN                     | PYRI        | -           | 0.31       | 1.05      | 0.40        | 2.92   |
| BZN                     | H2O         | -1.73       | -0.36      | -2.30     | -3.40       | 0.31   |

Table S.3 – Continued on next page

Table S.3 – Continued from previous page

| Solute (A)              | Solvent (B) | GROMOS-54A7 | GROMOS-ATB | OPLS-LBCC | AMBER-GAFF2 | OpenFF |
|-------------------------|-------------|-------------|------------|-----------|-------------|--------|
| [kJ·mol <sup>-1</sup> ] |             |             |            |           |             |        |
| BZN                     | C2CL2       | -           | -0.01      | 0.14      | -1.12       | 1.48   |
| BZN                     | EAE         | 0.60        | -0.22      | -0.45     | 0.15        | 2.36   |
| BZN                     | PTL         | -0.76       | -1.86      | -1.15     | 0.64        | 1.67   |
| BZN                     | MTL         | -0.34       | -0.09      | 0.28      | 0.47        | 0.57   |
| BZN                     | ETL         | -0.60       | -0.83      | -0.56     | -0.16       | 1.12   |
| BZN                     | BTL         | 0.02        | -0.36      | -1.01     | 0.64        | 1.32   |
| BZN                     | 2M2P        | -0.90       | -2.42      | -2.11     | -0.01       | 0.80   |
| BZN                     | 1PL         | 0.26        | -1.00      | -1.41     | 0.32        | 1.00   |
| BZN                     | 2PL         | -0.28       | -0.14      | -1.00     | 0.58        | 1.20   |
| BZN                     | ANLN        | 2.03        | -0.08      | -0.75     | 0.03        | 2.76   |
| BZN                     | DEE         | 9.65        | 8.46       | 9.10      | 10.28       | 11.81  |
| BZN                     | CHCL3       | 0.70        | -1.18      | -3.15     | -2.67       | 0.85   |
| BZN                     | DEAN        | -0.04       | -0.68      | 0.55      | 0.53        | 2.65   |
| BZN                     | TEAN        | 1.72        | 0.53       | 1.02      | 3.15        | 3.52   |
| BZN                     | TOL         | 0.96        | 0.03       | -0.16     | 0.84        | 2.76   |
| BZN                     | BZN         | 1.00        | -0.07      | 0.21      | 0.59        | 2.93   |
| BZN                     | HPE         | 0.57        | -1.17      | 0.53      | 1.53        | 2.97   |
| BZN                     | HXE         | 0.02        | -0.92      | 0.12      | 0.96        | 2.67   |
| BZN                     | CCL4        | 2.26        | 0.50       | -         | 1.57        | 3.53   |
| BZN                     | CHE         | 0.10        | -0.21      | 0.58      | 1.94        | 3.36   |
| HPE                     | DAMD        | -           | 1.29       | 5.35      | -3.48       | 1.98   |
| HPE                     | PPN         | -3.92       | -1.40      | 1.80      | -2.98       | -0.28  |
| HPE                     | BTN         | -3.21       | -1.43      | 2.16      | -2.98       | 0.22   |
| HPE                     | PYRI        | -           | -2.85      | 4.83      | -3.45       | -0.68  |
| HPE                     | H2O         | -0.67       | -1.12      | 0.20      | -1.58       | 0.62   |
| HPE                     | C2CL2       | -           | -2.74      | 5.34      | -5.13       | -2.50  |
| HPE                     | EAE         | -0.52       | -1.39      | 2.59      | -2.36       | 1.11   |
| HPE                     | PTL         | -2.92       | -3.21      | 1.50      | -3.15       | -1.24  |
| HPE                     | MTL         | -0.76       | -1.32      | 6.30      | -0.82       | -1.09  |
| HPE                     | ETL         | -1.64       | -2.74      | 3.16      | -2.27       | -0.39  |
| HPE                     | BTL         | -3.34       | -2.00      | 2.10      | -2.34       | -0.47  |
| HPE                     | 2M2P        | -2.17       | -3.13      | 1.50      | -3.92       | -1.37  |
| HPE                     | 1PL         | -3.44       | -2.54      | 1.45      | -2.68       | -0.84  |
| HPE                     | 2PL         | -3.10       | -2.80      | 1.90      | -2.95       | -0.95  |
| HPE                     | ANLN        | -1.10       | -5.62      | 1.64      | -1.76       | 1.66   |
| HPE                     | DEE         | -4.88       | -4.08      | -0.06     | -4.70       | -2.17  |
| HPE                     | CHCL3       | -4.20       | -1.69      | 1.82      | -5.73       | -3.16  |
| HPE                     | DEAN        | -3.28       | -5.61      | -1.22     | -5.54       | -2.75  |
| HPE                     | TEAN        | -2.42       | -2.86      | 1.06      | -3.44       | -0.42  |
| HPE                     | TOL         | -2.96       | -3.83      | 2.06      | -3.69       | -0.99  |
| HPE                     | BZN         | -2.26       | -4.61      | 1.94      | -2.36       | -0.42  |
| HPE                     | HPE         | -2.49       | -2.51      | 0.86      | -3.11       | -0.92  |
| HPE                     | HXE         | -1.99       | -2.05      | 1.03      | -3.07       | -0.74  |
| HPE                     | CCL4        | -3.05       | -2.25      | -         | -6.20       | -3.15  |
| HPE                     | CHE         | -2.91       | -2.84      | 1.36      | -2.84       | -0.81  |
| HXE                     | DAMD        | -           | 1.27       | 4.96      | -3.04       | 1.72   |
| HXE                     | PPN         | -2.92       | -1.06      | 2.00      | -2.13       | 0.13   |
| HXE                     | BTN         | -2.82       | -1.33      | 2.83      | -2.08       | 0.36   |
| HXE                     | PYRI        | -           | -1.88      | 5.40      | -2.49       | -0.31  |
| HXE                     | H2O         | -0.97       | -2.08      | 0.19      | -1.14       | 0.73   |
| HXE                     | C2CL2       | -           | -2.18      | 5.22      | -4.02       | -1.57  |

Table S.3 – Continued on next page

Table S.3 – Continued from previous page

| Solute (A)              | Solvent (B) | GROMOS-54A7 | GROMOS-ATB | OPLS-LBCC | AMBER-GAFF2 | OpenFF |
|-------------------------|-------------|-------------|------------|-----------|-------------|--------|
| [kJ·mol <sup>-1</sup> ] |             |             |            |           |             |        |
| HXE                     | EAE         | -0.20       | -1.19      | 2.47      | -1.51       | 1.24   |
| HXE                     | PTL         | -3.09       | -2.90      | 2.22      | -1.71       | 0.01   |
| HXE                     | MTL         | -1.20       | -1.34      | 5.33      | -0.95       | -0.50  |
| HXE                     | ETL         | -1.71       | -1.29      | 2.88      | -2.30       | -0.52  |
| HXE                     | BTL         | -2.03       | -2.55      | 1.83      | -1.83       | -0.07  |
| HXE                     | 2M2P        | -2.79       | -5.16      | 1.84      | -3.63       | -0.62  |
| HXE                     | 1PL         | -3.28       | -2.52      | 1.32      | -1.84       | -0.90  |
| HXE                     | 2PL         | -2.51       | -3.07      | 2.10      | -2.04       | -0.59  |
| HXE                     | ANLN        | -0.64       | -4.87      | 1.59      | -0.87       | 1.72   |
| HXE                     | DEE         | -3.48       | -2.45      | 0.75      | -3.08       | -1.35  |
| HXE                     | CHCL3       | -3.52       | -1.36      | 1.69      | -4.64       | -2.41  |
| HXE                     | DEAN        | -1.86       | -3.49      | 0.45      | -3.54       | -0.57  |
| HXE                     | TEAN        | -2.51       | -1.51      | 1.83      | -2.64       | 0.11   |
| HXE                     | TOL         | -2.32       | -2.98      | 2.01      | -2.89       | -0.24  |
| HXE                     | BZN         | -3.26       | -4.51      | 0.93      | -2.63       | -0.82  |
| HXE                     | HPE         | -1.80       | -2.07      | 0.78      | -2.56       | -0.29  |
| HXE                     | HXE         | -1.52       | -1.94      | 0.99      | -2.29       | -0.37  |
| HXE                     | CCL4        | -3.46       | -2.08      | -         | -5.30       | -2.35  |
| HXE                     | CHE         | -2.10       | -2.15      | 1.23      | -1.86       | 0.03   |
| CCL4                    | DAMD        | -           | 0.62       | -         | 3.09        | 3.87   |
| CCL4                    | PPN         | 0.18        | -1.05      | -         | 1.03        | 0.81   |
| CCL4                    | BTN         | 0.09        | -1.31      | -         | 0.58        | 0.42   |
| CCL4                    | PYRI        | -           | 1.49       | -         | 7.00        | 5.77   |
| CCL4                    | H2O         | 5.51        | 0.37       | -         | 5.48        | 4.06   |
| CCL4                    | C2CL2       | -           | -2.59      | -         | -0.02       | -1.28  |
| CCL4                    | EAE         | 1.97        | -2.90      | -         | 0.87        | 0.66   |
| CCL4                    | PTL         | -2.33       | -5.03      | -         | -2.53       | -3.82  |
| CCL4                    | MTL         | 1.71        | -0.53      | -         | 2.46        | -0.11  |
| CCL4                    | ETL         | 1.04        | -1.53      | -         | 0.50        | -0.84  |
| CCL4                    | BTL         | 0.85        | -2.37      | -         | -0.11       | -1.36  |
| CCL4                    | 2M2P        | 1.52        | -2.81      | -         | -0.98       | -0.43  |
| CCL4                    | 1PL         | 0.48        | -2.35      | -         | 0.60        | -1.22  |
| CCL4                    | 2PL         | 1.64        | -2.34      | -         | 1.15        | -0.48  |
| CCL4                    | ANLN        | 4.30        | -3.95      | -         | 5.08        | 1.47   |
| CCL4                    | DEE         | 0.35        | -2.98      | -         | -0.08       | -0.90  |
| CCL4                    | CHCL3       | -0.05       | -4.54      | -         | 1.02        | -0.07  |
| CCL4                    | DEAN        | 1.72        | -3.35      | -         | -0.31       | -0.66  |
| CCL4                    | TEAN        | -0.31       | -4.35      | -         | -0.78       | -1.46  |
| CCL4                    | TOL         | 0.33        | -3.87      | -         | -0.13       | -0.42  |
| CCL4                    | BZN         | -0.78       | -6.65      | -         | -1.60       | -2.27  |
| CCL4                    | HPE         | -0.48       | -2.74      | -         | -1.10       | -1.54  |
| CCL4                    | HXE         | -0.79       | -2.88      | -         | -1.34       | -1.93  |
| CCL4                    | CCL4        | -0.18       | -5.36      | -         | 0.25        | -0.64  |
| CCL4                    | CHE         | -0.62       | -2.46      | -         | -1.33       | -2.40  |
| CHE                     | DAMD        | -           | 4.60       | 4.05      | -2.90       | 0.08   |
| CHE                     | PPN         | -4.13       | 1.31       | 1.43      | -2.51       | -0.75  |
| CHE                     | BTN         | -2.83       | 1.66       | 2.05      | -2.39       | -0.37  |
| CHE                     | PYRI        | -           | 1.00       | 3.70      | -2.54       | -0.84  |
| CHE                     | H2O         | 0.75        | 1.93       | 1.50      | -0.38       | 1.07   |
| CHE                     | C2CL2       | -           | 0.58       | 3.81      | -3.72       | -2.32  |
| CHE                     | EAE         | -1.59       | 1.07       | 2.12      | -2.62       | -0.83  |

Table S.3 – Continued on next page

Table S.3 – *Continued from previous page*

| Solute (A)              | Solvent (B) | GROMOS-54A7 | GROMOS-ATB | OPLS-LBCC | AMBER-GAFF2 | OpenFF |
|-------------------------|-------------|-------------|------------|-----------|-------------|--------|
| [kJ·mol <sup>-1</sup> ] |             |             |            |           |             |        |
| CHE                     | PTL         | -2.31       | 0.34       | 1.37      | -2.12       | -1.02  |
| CHE                     | MTL         | -0.43       | 2.19       | 5.21      | -0.02       | -0.81  |
| CHE                     | ETL         | -1.11       | 1.20       | 2.99      | -2.32       | -1.10  |
| CHE                     | BTL         | -2.27       | 0.93       | 1.94      | -2.13       | -1.14  |
| CHE                     | 2M2P        | -2.35       | 0.12       | 1.18      | -2.91       | -1.53  |
| CHE                     | 1PL         | -2.42       | 0.51       | 1.84      | -1.83       | -1.68  |
| CHE                     | 2PL         | -2.80       | 1.69       | 1.83      | -3.05       | -1.40  |
| CHE                     | ANLN        | -3.05       | -1.03      | 1.47      | -0.60       | 0.42   |
| CHE                     | DEE         | -2.61       | 1.14       | 1.27      | -2.89       | -1.11  |
| CHE                     | CHCL3       | -2.94       | 2.94       | 2.12      | -4.09       | -2.01  |
| CHE                     | DEAN        | -1.91       | -0.86      | 0.07      | -3.11       | -1.57  |
| CHE                     | TEAN        | -2.56       | 0.63       | 1.03      | -3.36       | -1.21  |
| CHE                     | TOL         | -2.69       | 0.12       | 1.89      | -2.86       | -0.70  |
| CHE                     | BZN         | -2.52       | -0.18      | 1.28      | -1.53       | -0.82  |
| CHE                     | HPE         | -2.46       | 0.77       | 1.16      | -2.98       | -1.04  |
| CHE                     | HXE         | -2.49       | 0.72       | 1.14      | -2.89       | -0.91  |
| CHE                     | CCL4        | -2.30       | 1.69       | -         | -4.34       | -3.04  |
| CHE                     | CHE         | -2.48       | 1.63       | 1.50      | -3.20       | -1.48  |



## GROMOS-54A7

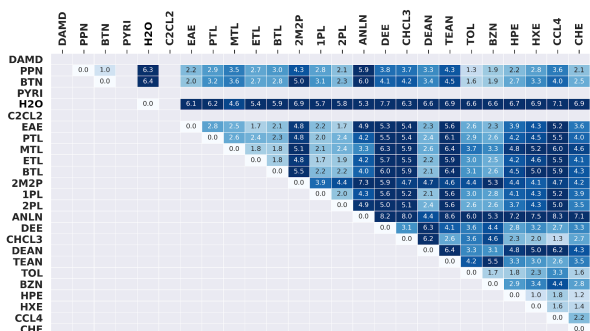

## GROMOS-ATB

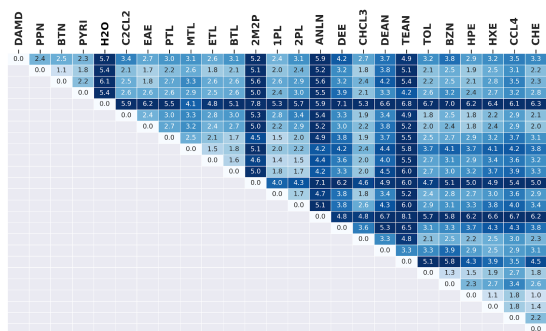

## OPLS-LBCC

Solvent A

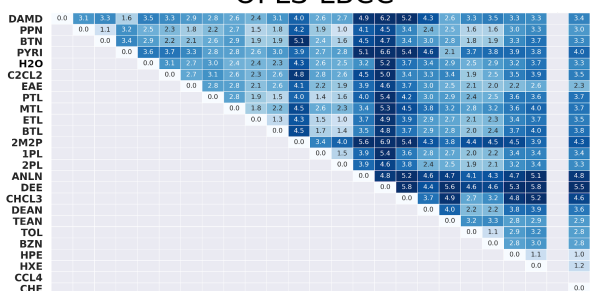

## AMBER-GAFF2

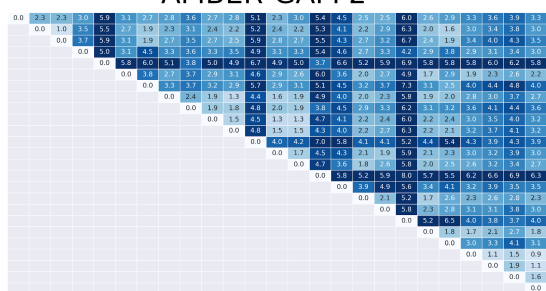

## OpenFF

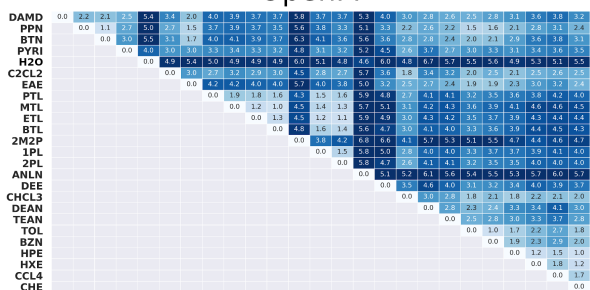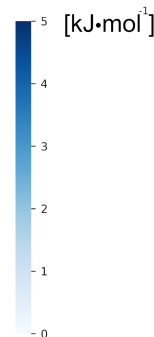

## Solvent B

Figure S.4: Root-mean-square error relative to experiment for the transfer free energies of all possible solutes C between any pair of solvents A and B, considering the FULL set. For each solvent pair, the RMSE of  $\Delta_t G_{C:A \rightarrow B}^{\ominus}$  is obtained by considering the entire series of solutes C. The values are shown for the five force fields newly considered in this work (Main Article Tab. 1). The molecules considered and their acronyms are shown in Main Article Fig. 1. This figure is the analog of Main Article Fig. 6 for the FULL set.

## S.2 Force-field comparison for individual compounds

The numerical values pertaining to Main Article Fig. 4 are reported in Tab. S.4. An analog of Main Article Fig. 4 for the FULL set is also displayed in Fig. S.5, with the corresponding numerical values in Tab. S.5.

Table S.4: Numerical values pertaining to Main Article Fig. 4. See the corresponding caption.

|      | RMSE As Solute [kJ·mol <sup>-1</sup> ] |             |            |               |         |           |            |             |        |                | RMSE As Solvent [kJ·mol <sup>-1</sup> ] |            |               |         |           |            |             |        |  |  |
|------|----------------------------------------|-------------|------------|---------------|---------|-----------|------------|-------------|--------|----------------|-----------------------------------------|------------|---------------|---------|-----------|------------|-------------|--------|--|--|
|      | GROMOS-2016H66                         | GROMOS-54A7 | GROMOS-ATB | CHARMM-CGenFF | OPLS-AA | OPLS-LBCC | AMBER-GAFF | AMBER-GAFF2 | OpenFF | GROMOS-2016H66 | GROMOS-54A7                             | GROMOS-ATB | CHARMM-CGenFF | OPLS-AA | OPLS-LBCC | AMBER-GAFF | AMBER-GAFF2 | OpenFF |  |  |
| DAMD | 4.7                                    | -           | 13.6       | 11.5          | 5.1     | 8.7       | 6.1        | 5.9         | 9.7    | 2.9            | -                                       | 5.1        | 3.5           | 3.8     | 4.3       | 3.5        | 3.5         | 3.0    |  |  |
| PPN  | 2.5                                    | 2.2         | 2.7        | 2.7           | 1.8     | 2.8       | 1.9        | 1.7         | 2.9    | 2.6            | 3.1                                     | 3.6        | 3.2           | 1.6     | 2.5       | 2.6        | 2.1         | 1.9    |  |  |
| BTN  | 2.1                                    | 1.9         | 1.7        | 2.8           | 1.4     | 2.1       | 1.4        | 1.6         | 2.9    | 2.7            | 3.3                                     | 3.9        | 1.9           | 2.9     | 3.6       | 2.7        | 2.5         |        |  |  |
| PYR  | 2.5                                    | -           | 2.5        | 2.6           | 3.3     | 3.4       | 3.7        | 4.2         | 3.0    | 2.2            | -                                       | 4.6        | 4.1           | 3.2     | 4.4       | 2.7        | 3.5         | 3.1    |  |  |
| H2O  | 4.8                                    | 4.3         | 5.5        | 5.5           | 4.4     | 3.8       | 4.9        | 5.0         | 3.8    | 2.7            | 5.6                                     | 6.0        | 6.4           | 4.6     | 3.2       | 5.5        | 5.4         | 5.2    |  |  |
| EAE  | 2.5                                    | 8.7         | 4.8        | 2.0           | 3.6     | 3.9       | 5.1        | 3.5         | 6.0    | 2.9            | 4.6                                     | 3.7        | 2.7           | 3.0     | 2.3       | 4.6        | 3.3         | 2.4    |  |  |
| PTL  | 3.3                                    | 4.5         | 2.8        | 2.3           | 2.2     | 2.7       | 3.8        | 2.9         | 3.2    | 2.6            | 4.2                                     | 2.3        | 3.7           | 2.2     | 3.3       | 2.8        | 2.7         | 4.4    |  |  |
| MTL  | 2.6                                    | 4.7         | 4.6        | 2.3           | 3.4     | 2.7       | 2.7        | 4.2         | 3.8    | 2.4            | 4.2                                     | 4.9        | 5.2           | 2.9     | 4.0       | 4.1        | 3.3         | 5.0    |  |  |
| ETL  | 2.7                                    | 3.8         | 3.9        | 2.8           | 3.0     | 2.6       | 2.7        | 3.8         | 3.0    | 2.5            | 3.9                                     | 4.7        | 4.3           | 2.4     | 3.4       | 3.9        | 3.2         | 4.8    |  |  |
| BTL  | 3.0                                    | 4.5         | 2.3        | 1.9           | 2.7     | 3.0       | 3.7        | 2.5         | 2.6    | 2.6            | 4.3                                     | 4.8        | 4.5           | 2.3     | 3.4       | 3.5        | 3.1         | 4.7    |  |  |
| 2M2P | 2.9                                    | 2.7         | 7.0        | 1.6           | 1.4     | 1.5       | 3.8        | 2.6         | 2.1    | 2.5            | 2.8                                     | 6.0        | 4.3           | 3.2     | 3.2       | 4.4        | 3.2         | 4.0    |  |  |
| IPL  | 2.8                                    | 4.2         | 4.0        | 1.9           | 2.8     | 3.0       | 3.6        | 2.7         | 3.0    | 4.1            | 4.8                                     | 4.2        | 4.2           | 2.3     | 3.2       | 3.5        | 3.1         | 4.7    |  |  |
| 2PL  | 1.9                                    | 3.2         | 4.9        | 1.9           | 1.9     | 1.6       | 3.8        | 2.6         | 2.3    | 2.2            | 4.0                                     | 5.4        | 3.8           | 2.3     | 3.1       | 3.5        | 2.7         | 4.4    |  |  |
| ANLN | 3.9                                    | 6.0         | 4.3        | 2.7           | 5.5     | 4.4       | 3.7        | 4.3         | 3.5    | 5.6            | 6.5                                     | 6.2        | 5.9           | 4.2     | 3.7       | 5.9        | 4.6         | 4.6    |  |  |
| DEE  | 1.2                                    | 3.1         | 2.0        | 2.0           | 2.6     | 2.0       | 3.1        | 2.9         | 1.8    | 4.3            | 4.2                                     | 5.0        | 4.3           | 3.9     | 5.0       | 4.0        | 4.2         | 4.1    |  |  |
| DEAN | 2.7                                    | 3.3         | 4.3        | 8.4           | 2.6     | 2.2       | 3.9        | 3.8         | 3.0    | 3.3            | 5.1                                     | 5.4        | 4.2           | 2.3     | 3.5       | 3.7        | 3.7         | 3.3    |  |  |
| TEAN | 4.2                                    | 4.9         | 6.6        | 5.7           | 3.0     | 2.8       | 5.9        | 5.2         | 4.2    | 3.0            | 4.0                                     | 5.9        | 3.0           | 4.2     | 3.3       | 4.9        | 5.9         | 2.3    |  |  |
| TOL  | 0.7                                    | 0.6         | 1.2        | 0.9           | 0.7     | 1.3       | 3.1        | 1.1         | 2.0    | 2.4            | 2.8                                     | 4.2        | 2.4           | 2.4     | 2.7       | 2.0        | 2.2         | 2.2    |  |  |
| BZN  | 2.2                                    | 2.3         | 2.0        | 2.3           | 2.4     | 2.2       | 3.4        | 2.5         | 3.4    | 2.5            | 3.1                                     | 4.3        | 2.4           | 2.5     | 2.4       | 2.4        | 2.3         | 2.2    |  |  |
| HPE  | 2.6                                    | 2.7         | 3.1        | 1.3           | 1.6     | 2.6       | 1.1        | 3.1         | 1.2    | 2.2            | 2.4                                     | 3.4        | 2.1           | 2.5     | 1.8       | 2.0        | 2.6         | 2.1    |  |  |
| HXE  | 2.2                                    | 2.3         | 2.7        | 1.2           | 1.4     | 2.5       | 1.1        | 2.3         | 0.8    | 2.7            | 2.8                                     | 3.5        | 2.3           | 2.8     | 2.4       | 2.5        | 2.9         | 2.5    |  |  |
| CRE  | 2.3                                    | 2.4         | 1.5        | 1.3           | 1.5     | 2.2       | 0.9        | 2.5         | 1.1    | 2.3            | 2.8                                     | 3.2        | 2.0           | 2.3     | 1.9       | 2.2        | 2.7         | 2.3    |  |  |

  

|      | AVEE As Solute [kJ·mol <sup>-1</sup> ] |             |            |               |         |           |            |             |        |                | AVEE As Solvent [kJ·mol <sup>-1</sup> ] |            |               |         |           |            |             |        |  |  |
|------|----------------------------------------|-------------|------------|---------------|---------|-----------|------------|-------------|--------|----------------|-----------------------------------------|------------|---------------|---------|-----------|------------|-------------|--------|--|--|
|      | GROMOS-2016H66                         | GROMOS-54A7 | GROMOS-ATB | CHARMM-CGenFF | OPLS-AA | OPLS-LBCC | AMBER-GAFF | AMBER-GAFF2 | OpenFF | GROMOS-2016H66 | GROMOS-54A7                             | GROMOS-ATB | CHARMM-CGenFF | OPLS-AA | OPLS-LBCC | AMBER-GAFF | AMBER-GAFF2 | OpenFF |  |  |
| DAMD | -4.2                                   | -           | -13.2      | -10.8         | -4.5    | -8.2      | -5.4       | -5.3        | -8.3   | -1.2           | -                                       | -0.6       | 0.3           | 1.5     | 1.4       | -1.4       | -1.5        | -0.8   |  |  |
| PPN  | -1.9                                   | -1.1        | -2         | -0.8          | 0.7     | -2.4      | -0.6       | -0.6        | -1.8   | -1.5           | -1.9                                    | -1.2       | -0.9          | 0.6     | -0.3      | -1.3       | -1.3        | -0.6   |  |  |
| BTN  | -1.7                                   | -0.5        | -0.7       | -0.9          | 0.3     | -1.7      | -0.3       | -0.9        | -1.8   | -1.6           | -2.1                                    | -1.7       | -1.5          | 0.2     | -0.7      | -1.6       | -1.7        | -1.1   |  |  |
| PYR  | 0.9                                    | -           | -0.8       | 0.6           | 1.5     | -2.2      | 2.6        | 3.2         | 1.1    | 0.1            | -                                       | -0.8       | 0.5           | 1.5     | 1.7       | 0.7        | 0.4         | 0.2    |  |  |
| H2O  | 1                                      | 2.6         | 3          | 0.4           | 2.6     | 0.6       | 2.5        | 2.5         | 1.9    | 0.8            | 1.4                                     | 2.2        | 1.2           | 3.7     | -0.3      | 2.3        | 2.1         | 2.9    |  |  |
| EAE  | -2                                     | -8.3        | -4.2       | 0.3           | -2.4    | -3.5      | -4.5       | -2.7        | -5.4   | -1             | -2.4                                    | -1.2       | -0.6          | 1.5     | 0.2       | -1.6       | -1.6        | -0.5   |  |  |
| PTL  | -2.6                                   | -3.5        | 1.9        | -0.6          | 1.6     | 1.9       | -2.6       | -1.3        | 0      | -1.7           | -2.8                                    | -1.8       | -0.4          | 0.9     | 0         | -0.8       | -0.8        | -0.7   |  |  |
| MTL  | -1                                     | -2.5        | 4.1        | 1.1           | 3       | 2.2       | 0.2        | 3.2         | 3      | -0.7           | -2                                      | -0.5       | 0.2           | 1.9     | 0.9       | -0.9       | 0           | -1.2   |  |  |
| ETL  | -0.5                                   | -2          | 2.6        | 0.6           | 2.5     | 1.8       | 0.3        | 2.8         | 2.1    | -1.4           | -2.3                                    | -0.9       | -0.3          | 1.2     | 0.2       | -1.2       | -0.9        | -0.9   |  |  |
| BTL  | -1.8                                   | -3.3        | 0          | -0.2          | 2.1     | 2.4       | -2.5       | -0.9        | 0.9    | -1.7           | -3.1                                    | -1.5       | -0.8          | 0.8     | -0.3      | -1         | -1          | -1.1   |  |  |
| 2M2P | 2.3                                    | 1.7         | -6.2       | -0.5          | 0.4     | 0.4       | -2.8       | -1.2        | -0.8   | -0.4           | -1.6                                    | -2.7       | 0.2           | 1.5     | 0.4       | -1.2       | -0.6        | 0      |  |  |
| IPL  | -1.4                                   | -2.9        | 3.4        | 0.1           | 2.4     | 2.4       | -2.1       | -0.1        | 1.2    | -1.4           | -2.3                                    | -1.4       | -0.6          | 0.9     | -0.2      | -0.7       | -0.9        | -0.9   |  |  |
| 2PL  | 0.5                                    | -1          | -4.2       | 0.4           | 1.1     | 0.4       | -2.4       | -0.2        | 0.3    | -1.3           | -2.4                                    | -1.6       | -0.5          | 1       | 0         | -0.8       | -0.7        | -0.9   |  |  |
| ANLN | 1.8                                    | -2.9        | 3.6        | 0.1           | 4.6     | 2.5       | 0.9        | -2.2        | 0.6    | -1.7           | -2.7                                    | -2.1       | 0.7           | -1      | 0         | 0.5        | -0.4        | 1.1    |  |  |
| DEE  | -0.2                                   | 0.7         | -1.1       | 1.5           | 2.2     | 1.4       | 2.2        | 1.9         | 0.3    | -0.9           | 0.3                                     | -1.5       | -0.4          | 0.9     | 0.1       | 0.8        | 0.7         | 0.1    |  |  |
| DEAN | 0                                      | -0.7        | 1          | 6.9           | 0.8     | 0.6       | 1          | 1.3         | -1     | -2.3           | -3.4                                    | -0.4       | 1.8           | -0.4    | -0.8      | -1.6       | -1.6        | -2     |  |  |
| TEAN | -1.6                                   | -0.6        | -3.7       | 3.5           | 0.1     | 0.2       | 2          | 0.6         | -2     | 0.5            | 1.2                                     | 1.9        | 2.6           | 1.7     | 1.1       | 3.4        | 3.2         | -0.6   |  |  |
| TOL  | 0                                      | -0.2        | -0.8       | 0.3           | 0       | -0.7      | 3          | 0.7         | 1.7    | -0.8           | -1.7                                    | -0.3       | 0.2           | -0.9    | -0.3      | -0.6       | -0.8        | -0.8   |  |  |
| BZN  | 0.9                                    | 0.6         | 0          | 1.1           | 1.2     | 0.2       | 2.6        | 0.9         | 2.6    | -1             | -2.2                                    | -2.2       | 0.3           | 0.7     | -0.6      | -0.8       | -1.1        | -0.6   |  |  |
| HPE  | -2.4                                   | -2.5        | -2.7       | 0.2           | 0.6     | 2         | 0.3        | -3          | -0.5   | 0.2            | -0.3                                    | -0.9       | 0.7           | 1       | 0.8       | 0.8        | 0.7         | 0.5    |  |  |
| HXE  | -2                                     | -2.2        | -2.3       | 0.3           | 0.8     | 2.1       | 0.8        | -2.2        | -0.1   | 0.7            | 0.1                                     | -0.5       | 1             | 1.3     | 1.2       | 1.2        | 0.9         | 0.8    |  |  |
| CRE  | -2.1                                   | -2.2        | 1          | 1             | 1       | 1.9       | 0.2        | -2.3        | -0.9   | 0              | -0.8                                    | -0.9       | 0.5           | 0.7     | 0.6       | 0.8        | 0.6         | 0.3    |  |  |

Table S.5: Numerical values pertaining to Fig. S.5. See the corresponding caption.

|       | RMSE As Solute [kJ·mol <sup>-1</sup> ] |             |            |               |         |           |            |             |        |                | RMSE As Solvent [kJ·mol <sup>-1</sup> ] |            |               |         |           |            |             |        |  |  |
|-------|----------------------------------------|-------------|------------|---------------|---------|-----------|------------|-------------|--------|----------------|-----------------------------------------|------------|---------------|---------|-----------|------------|-------------|--------|--|--|
|       | GROMOS-2016H66                         | GROMOS-54A7 | GROMOS-ATB | CHARMM-CGenFF | OPLS-AA | OPLS-LBCC | AMBER-GAFF | AMBER-GAFF2 | OpenFF | GROMOS-2016H66 | GROMOS-54A7                             | GROMOS-ATB | CHARMM-CGenFF | OPLS-AA | OPLS-LBCC | AMBER-GAFF | AMBER-GAFF2 | OpenFF |  |  |
| DAMD  | 4.4                                    | -           | 13.4       | 11.3          | 5.0     | 8.9       | 5.9        | 5.7         | 9.3    | 3.0            | -                                       | 4.8        | 3.8           | 3.6     | 4.2       | 3.3        | 3.4         | 3.0    |  |  |
| PPN   | 2.4                                    | 2.1         | 2.7        | 2.8           | 1.9     | 3.1       | 2.0        | 1.7         | 2.8    | 2.6            | 3.0                                     | 3.4        | 3.3           | 1.6     | 3.0       | 2.5        | 2.0         | 1.8    |  |  |
| BTN   | 2.1                                    | 1.9         | 1.7        | 2.9           | 1.4     | 2.3       | 1.4        | 1.6         | 2.7    | 2.6            | 3.1                                     | 3.7        | 4.0           | 1.8     | 3.2       | 2.9        | 2.6         | 2.4    |  |  |
| PYRI  | 4.3                                    | -           | 3.8        | 3.7           | 4.1     | 4.1       | 4.8        | 5.3         | 4.3    | 2.9            | -                                       | 4.3        | 4.1           | 3.3     | 4.6       | 3.0        | 3.6         | 3.2    |  |  |
| HEO   | 6.2                                    | 5.9         | 6.4        | 5.6           | 4.7     | 6.1       | 5.6        | 6.0         | 5.5    | 3.3            | 5.6                                     | 5.7        | 6.5           | 4.6     | 3.5       | 5.4        | 5.4         | 5.1    |  |  |
| CSCL2 | 2.5                                    | -           | 2.6        | 4.0           | 2.2     | 6.3       | 2.1        | 2.2         | 2.3    | 3.4            | -                                       | 3.5        | 3.7           | 2.1     | 3.5       | 1.9        | 2.5         | 2.8    |  |  |
| EAE   | 2.4                                    | 8.4         | 4.7        | 2.1           | 3.4     | 3.9       | 5.0        | 3.4         | 5.8    | 2.8            | 2.8                                     | 3.8        | 3.6           | 2.7     | 2.9       | 2.5        | 3.7         | 3.1    |  |  |
| PTL   | 3.2                                    | 4.3         | 2.7        | 2.2           | 2.1     | 2.7       | 3.6        | 2.8         | 3.0    | 2.5            | 4.1                                     | 4.6        | 3.7           | 2.1     | 4.0       | 2.7        | 2.6         | 4.2    |  |  |
| MTL   | 2.9                                    | 4.7         | 4.5        | 2.3           | 3.5     | 2.7       | 2.8        | 4.3         | 3.8    | 2.7            | 4.1                                     | 4.7        | 5.3           | 2.9     | 4.0       | 3.9        | 3.3         | 4.7    |  |  |
| ETL   | 2.9                                    | 3.8         | 3.9        | 2.8           | 3.1     | 2.6       | 2.6        | 3.8         | 3.0    | 2.5            | 3.8                                     | 4.5        | 4.3           | 2.3     | 3.8       | 3.6        | 3.1         | 4.6    |  |  |
| BTL   | 3.0                                    | 4.3         | 2.3        | 1.9           | 2.6     | 2.9       | 3.6        | 2.4         | 2.5    | 2.5            | 4.1                                     | 4.6        | 4.4           | 2.2     | 3.8       | 3.2        | 2.9         | 4.5    |  |  |
| 2M2P  | 3.4                                    | 6.8         | 6.7        | 1.9           | 1.5     | 2.0       | 3.7        | 2.6         | 2.1    | 4.6            | 4.9                                     | 6.7        | 5.2           | 4.8     | 5.0       | 5.8        | 5.0         | 5.6    |  |  |
| 1PL   | 2.8                                    | 4.1         | 3.9        | 1.9           | 2.8     | 3.0       | 3.4        | 2.7         | 2.6    | 2.8            | 4.0                                     | 4.5        | 4.2           | 2.2     | 3.7       | 3.3        | 2.9         | 4.4    |  |  |
| 2PL   | 2.6                                    | 3.3         | 4.7        | 2.3           | 2.0     | 1.8       | 3.6        | 2.6         | 2.3    | 2.4            | 3.9                                     | 5.1        | 3.8           | 2.3     | 3.5       | 3.3        | 2.7         | 4.2    |  |  |
| ANLN  | 4.4                                    | 5.9         | 4.4        | 2.9           | 5.5     | 4.3       | 3.6        | 4.1         | 3.5    | 6.2            | 6.3                                     | 6.6        | 6.3           | 4.9     | 4.4       | 6.4        | 5.6         | 5.3    |  |  |
| DEE   | 1.2                                    | 3.0         | 2.1        | 2.0           | 2.5     | 2.0       | 2.9        | 2.7         | 1.8    | 4.1            | 4.0                                     | 4.9        | 4.3           | 3.6     | 5.2       | 3.8        | 3.9         | 3.9    |  |  |
| CHCL3 | 3.5                                    | 3.5         | 3.5        | -             | 2.8     | 5.3       | 3.1        | 3.2         | 2.6    | 3.8            | 3.4                                     | 4.0        | -             | 2.6     | 4.4       | 2.2        | 2.8         | 2.5    |  |  |
| DEAN  | 2.6                                    | 3.3         | 4.1        | 8.2           | 2.4     | 2.2       | 3.7        | 3.5         | 2.8    | 3.2            | 4.9                                     | 5.2        | 4.2           | 2.2     | 4.0       | 3.5        | 3.1         | 3.1    |  |  |
| TEAN  | 4.2                                    | 4.7         | 6.5        | 5.6           | 3.1     | 2.8       | 5.6        | 5.1         | 4.2    | 3.1            | 4.1                                     | 5.7        | 4.1           | 3.4     | 3.2       | 4.9        | 5.7         | 2.5    |  |  |
| TOL   | 0.7                                    | 0.6         | 1.2        | 0.9           | 0.7     | 1.6       | 3.1        | 1.1         | 2.0    | 2.3            | 2.6                                     | 4.1        | 2.4           | 2.2     | 3.0       | 1.9        | 2.1         | 2.1    |  |  |
| BZN   | 2.2                                    | 2.3         | 1.9        | 2.3           | 2.3     | 2.2       | 3.3        | 2.4         | 3.3    | 3.5            | 3.1                                     | 4.6        | 2.4           | 2.5     | 3.0       | 3.4        | 2.3         | 2.3    |  |  |
| HPE   | 2.8                                    | 2.8         | 3.0        | 1.6           | 1.6     | 2.7       | 1.2        | 3.5         | 1.5    | 2.1            | 2.3                                     | 3.3        | 2.1           | 2.4     | 1.9       | 2.1        | 2.5         | 2.1    |  |  |
| HXE   | 2.3                                    | 2.5         | 2.6        | 1.4           | 1.5     | 2.7       | 1.2        | 2.7         | 1.0    | 2.6            | 2.7                                     | 3.5        | 2.3           | 2.7     | 2.4       | 2.4        | 2.8         | 2.4    |  |  |
| CCL4  | 2.7                                    | 1.8         | 3.2        | -             | 2.3     | -         | 2.2        | 2.4         | 2.1    | 3.4            | 3.2                                     | 4.1        | -             | 3.2     | -         | 3.1        | 3.7         | 3.1    |  |  |
| CHE   | 2.5                                    | 2.4         | 1.6        | 1.4           | 1.5     | 2.3       | 1.0        | 2.7         | 1.3    | 2.2            | 2.7                                     | 3.1        | 1.9           | 2.2     | 1.9       | 2.2        | 2.6         | 2.3    |  |  |

  

|       | AVEE As Solute [kJ·mol <sup>-1</sup> ] |             |            |               |         |           |            |             |        |                | AVEE As Solvent [kJ·mol <sup>-1</sup> ] |            |               |         |           |            |             |        |  |  |
|-------|----------------------------------------|-------------|------------|---------------|---------|-----------|------------|-------------|--------|----------------|-----------------------------------------|------------|---------------|---------|-----------|------------|-------------|--------|--|--|
|       | GROMOS-2016H66                         | GROMOS-54A7 | GROMOS-ATB | CHARMM-CGenFF | OPLS-AA | OPLS-LBCC | AMBER-GAFF | AMBER-GAFF2 | OpenFF | GROMOS-2016H66 | GROMOS-54A7                             | GROMOS-ATB | CHARMM-CGenFF | OPLS-AA | OPLS-LBCC | AMBER-GAFF | AMBER-GAFF2 | OpenFF |  |  |
| DAMD  | -3.7                                   | -           | -13.0      | -10.5         | -4.4    | -8.4      | -5.2       | -5.1        | -7.9   | -0.6           | -                                       | -0.3       | 0.7           | 1.6     | 1.0       | -1.1       | -1.0        | -0.3   |  |  |
| PPN   | -1.6                                   | -0.9        | -1.9       | -0.6          | 0.8     | -2.6      | -0.5       | -0.5        | -1.6   | -1.1           | -1.1                                    | -0.7       | 0.6           | -0.8    | -1.1      | -1.0       | -0.4        | -0.4   |  |  |
| BTN   | -1.3                                   | -0.4        | -0.6       | -0.7          | 0.4     | -1.8      | -0.2       | -0.9        | -1.6   | -1.2           | -1.8                                    | -1.6       | -1.2          | 0.3     | -1.1      | -1.4       | -0.9        | -0.5   |  |  |
| PYRI  | 1.8                                    | -           | -0.1       | 1.2           | 2.0     | -1.9      | 3.0        | 3.7         | 1.8    | 0.6            | -                                       | -0.7       | 0.6           | 1.5     | 1.1       | 0.9        | 0.7         | 0.5    |  |  |
| HEO   | 2.4                                    | 3.7         | 3.8        | 1.4           | 3.5     | 1.1       | 3.3        | 3.3         | 3.0    | 1.4            | 1.8                                     | 2.1        | 1.5           | 3.9     | -0.6      | 2.6        | 2.4         | 3.1    |  |  |
| CSCL2 | 1.6                                    | -           | 1.9        | 2.9           | 0.0     | -5.5      | 0.1        | 1.3         | 1.1    | 0.1            | -                                       | -1.0       | 1.6           | 0.5     | -0.8      | -0.2       | -0.4        | -0.3   |  |  |
| EAE   | -1.7                                   | -7.9        | -4.1       | 0.5           | -2.3    | -3.5      | -4.3       | -2.6        | -5.2   | -0.7           | -2.0                                    | -1.2       | -0.4          | 1.4     | -0.2      | -1.4       | -1.3        | -0.3   |  |  |
| PTL   | -2.1                                   | -3.1        | 1.8        | -0.5          | 1.6     | 1.6       | -2.5       | -1.2        | -0.0   | -1.6           | -2.7                                    | -1.8       | -0.3          | 0.6     | -0.7      | -0.9       | -0.8        | -0.8   |  |  |
| MTL   | -0.4                                   | -1.9        | 4.0        | 1.2           | 3.1     | 1.9       | 0.3        | 3.4         | 3.0    | -0.1           | -1.6                                    | -0.3       | 0.5           | 2.0     | 0.5       | -0.6       | 0.4         | -0.9   |  |  |
| ETL   | -0.0                                   | -1.5        | 2.7        | 0.6           | 2.5     | 1.5       | 0.4        | 2.9         | 2.1    | -0.9           | -1.9                                    | -0.8       | -0.1          | 1.2     | -0.3      | -1.0       | -0.6        | -0.8   |  |  |
| BTL   | -1.3                                   | -2.8        | 0.2        | -0.1          | 2.1     | 2.1       | -2.3       | -0.7        | 0.9    | -1.3           | -2.7                                    | -1.4       | -0.7          | 0.6     | -0.9      | -0.9       | -0.8        | -1.0   |  |  |
| 2M2P  | 2.7                                    | 1.9         | -5.8       | -0.2          | 0.4     | 0.2       | -2.6       | -1.0        | -0.7   | 0.7            | -0.1                                    | -1.6       | 0.8           | 2.1     | 0.4       | -0.0       | 0.4         | 0.9    |  |  |
| 1PL   | -0.9                                   | -2.4        | 3.3        | 0.1           | 2.3     | 2.0       | -1.9       | 0.0         | 1.2    | -1.0           | -2.0                                    | -1.3       | -0.5          | 0.8     | -0.9      | -0.6       | -0.6        | -0.8   |  |  |
| 2PL   | 1.1                                    | -0.6        | -3.9       | 0.6           | 1.2     | 0.3       | -2.1       | 0.1         | 0.4    | -0.8           | -1.9                                    | -1.4       | -0.3          | 1.0     | -0.3      | -0.3       | -0.3        | -0.6   |  |  |
| ANLN  | 2.4                                    | -2.2        | 3.8        | 0.3           | 4.7     | 2.3       | 1.1        | -1.9        | 1.0    | -0.5           | -2.3                                    | -1.5       | 0.6           | -0.1    | 1.2       | 0.7        | 1.7         | 1.7    |  |  |
| DEE   | -0.2                                   | 0.5         | -1.2       | 1.4           | 2.0     | 1.2       | 1.9        | 1.6         | 0.1    | -0.7           | 0.3                                     | -1.6       | -0.3          | 0.7     | -0.4      | 0.7        | 0.6         | 0.0    |  |  |
| CHCL3 | 1.7                                    | 1.4         | -2.2       | -             | 0.9     | -4.6      | 1.6        | 1.7         | 1.0    | 2.1            | 1.2                                     | -1.0       | -             | 1.1     | -3.3      | -0.6       | -0.8        | -0.3   |  |  |
| DEAN  | 0.1                                    | -0.4        | 0.9        | 6.8           | 0.4     | 0.9       | 0.9        | 1.1         | -1.0   | -1.8           | -3.0                                    | -0.4       | 1.8           | -0.4    | -1.4      | -1.3       | -1.3        | -1.9   |  |  |
| TEAN  | -1.9                                   | -0.8        | -3.9       | 3.3           | -0.3    | -0.0      | 1.6        | 0.2         | -2.3   | 0.5            | 1.4                                     | 1.6        | 2.4           | 1.4     | 0.6       | 3.2        | 3.0         | 0.6    |  |  |
| TOL   | 0.0                                    | -0.1        | -0.8       | 0.3           | 0.0     | -0.9      | 2.9        | 0.5         | 1.7    | -0.7           | -1.5                                    | -1.8       | 0.4           | 0.2     | -1.3      | -0.3       | -0.6        | -0.7   |  |  |
| BZN   | 1.0                                    | 0.7         | -0.0       | 1.0           | 1.1     | 0.0       | 2.5        | 0.7         | 2.5    | -1.1           | -2.3                                    | -2.5       | 0.4           | -1.1    | -1.0      | -1.3       | -0.8        | -0.8   |  |  |
| HPE   | -2.6                                   | -2.6        | -2.6       | -0.0          | 0.4     | 2.1       | 0.1        | -3.3        | -0.8   | 0.2            | -0.2                                    | -0.9       | 0.8           | 0.9     | 0.8       | 0.9        | 0.7         | 0.5    |  |  |
| HXE   | -2.2                                   | -2.3        | -2.3       | 0.1           | 0.6     | 2.2       | 0.6        | -2.5        | -0.3   | 0.5            | -0.1                                    | -0.7       | 0.9           | 1.0     | 1.0       | 1.0        | 0.7         | 0.6    |  |  |
| CCL4  | 1.3                                    | 0.7         | -2.6       | -             | 0.4     | -         | 0.6        | 0.8         | -0.2   | 1.8            | 0.9                                     | 0.4        | -             | 1.1     | -         | 1.3        | 1.0         | 0.9    |  |  |
| CHE   | -2.3                                   | -2.3        | -2.3       | 0.9           | 0.8     | 2.0       | 0.0        | -2.5        | -1.0   | -0.1           | -0.8                                    | -0.9       | 0.5           | 0.6     | 0.6       | 0.7        | 0.6         | 0.2    |  |  |

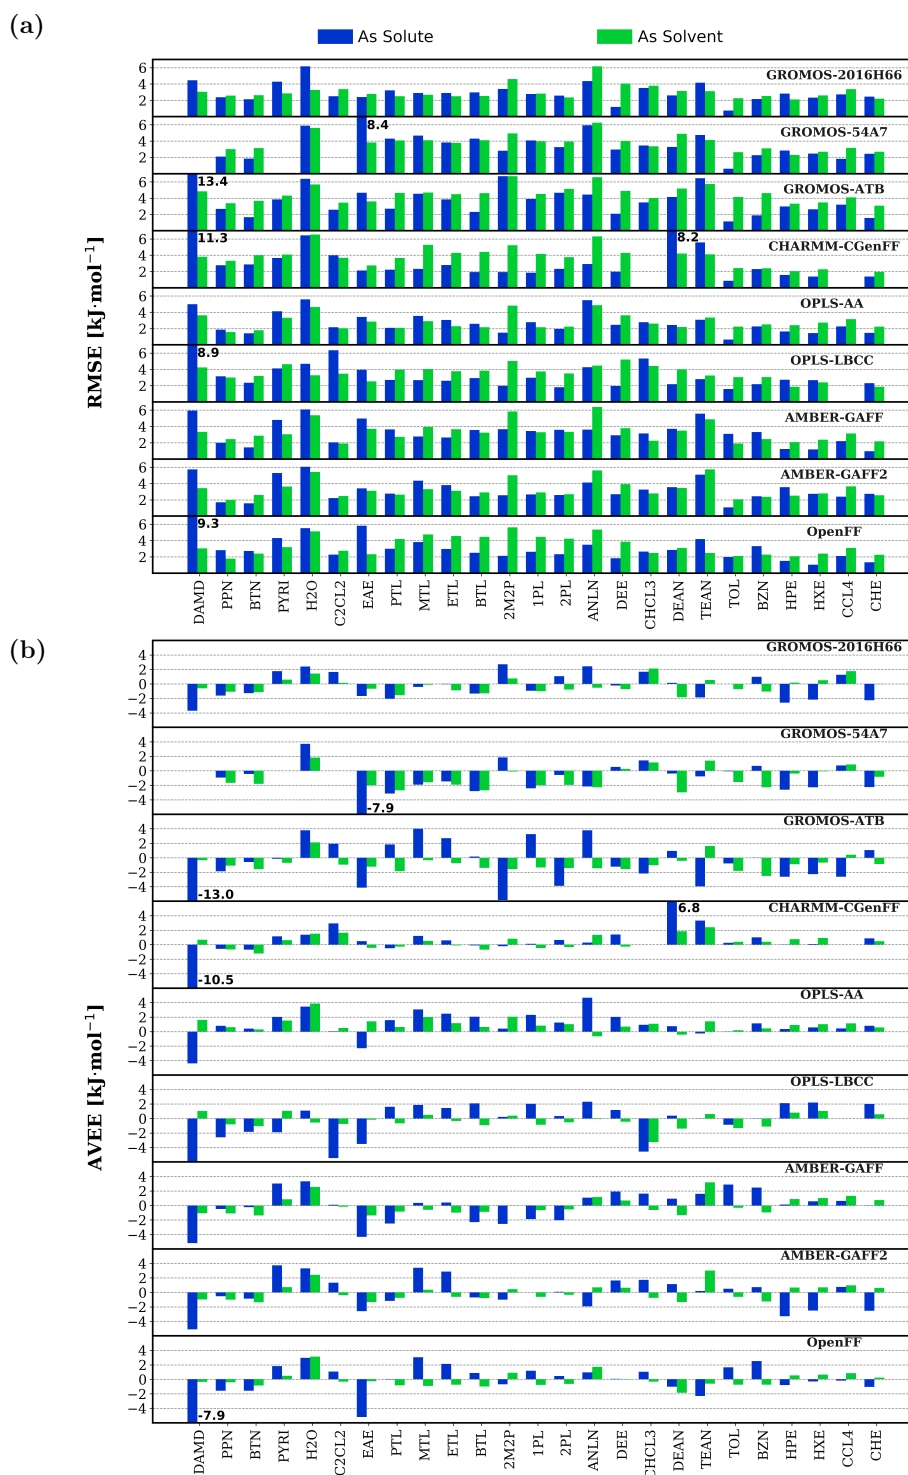

Figure S.5: Deviations between experimental and calculated cross-solvation free energies for the nine force fields, considering the FULL set and individual compounds as solute or solvent. The quantities displayed are (a) the root-mean-square error (RMSE) and (b) the average error (AVEE). Each molecule is considered as solute (blue bars) or as solvent (green bars). The molecules considered and their acronyms are shown in Main Article Fig. 1. They are listed in order of decreasing polarity, as estimated by the molecular dipole moment  $\mu$ . The numerical values can be found in Tab. S.5. A corresponding comparison considering the COMP set is shown in Main Article Fig. 4, with numerical values in Tab. S.4.

### S.3 Single-value and two-solvent models

To provide a baseline in assessing the relative accuracies of the nine force fields, two very simple models have also been considered for estimating the entire set of 625 experimental cross-solvation free energies based on a highly reduced number of experimental parameters. These have been termed the single-value and the two-solvent model. The statistical parameters characterizing the correlation between experimental and calculated cross-solvation free energies for these two models are also reported along the values for the nine force fields in Main Article Tab. 2. The goal of this section is to provide more detailed information concerning these two models and the corresponding results.

The single-value model assumes that all cross-solvation free energies are identical and equal to  $-18.4 \text{ kJ}\cdot\text{mol}^{-1}$ , which is the average of the 625 entries of the matrix ( $-18.4$  and  $-17.8 \text{ kJ}\cdot\text{mol}^{-1}$  for the COMP and CONF sets, respectively)

Clearly, one would expect any decent physics-based model to outperform such a crude model relying on a unique  $\Delta_s G_{A:B}^\ominus$  value. The deviations between experimental and calculated cross-solvation free energies for this single-value model are shown in Fig. S.6a.

The two-solvent model relies on the assumption that the solvation free energies measured in two solvents only, one polar and one non-polar, should encompass most of the information contained in the 625 entries of the cross-solvation matrix. The idea here is to test the validity of this assumption, commonly made in force-field refinement<sup>32</sup>. Given the choice of these two solvents, labelled 1 and 2, the rest of the matrix is fitted against an equation of the form

$$\Delta_s G_{A:B}^\ominus = \alpha_0 + \alpha_{A:1} \cdot \Delta_s G_{A:1}^\ominus + \alpha_{A:2} \cdot \Delta_s G_{A:2}^\ominus + \alpha_{B:1} \cdot \Delta_s G_{B:1}^\ominus + \alpha_{B:2} \cdot \Delta_s G_{B:2}^\ominus, \quad (\text{S.1})$$

which involves five empirical coefficients  $\alpha$ . The RMSE of this fit is shown in Fig. S.6b considering all possible pairs of solvents 1 and 2. Both the fitting and the RSME calculation are performed considering the FULL set excluding the two columns corresponding to 1 or 2 as solvent. To achieve a good correlation, it is necessary to select water as one of the

two solvents, while the second solvent should preferentially be among the least polar ones. Accordingly, the solvent pair H2O and CHE has been selected as a choice commonly used in force-field refinement<sup>32</sup>. The corresponding equation reads (with units of  $\text{kJ}\cdot\text{mol}^{-1}$ )

$$\Delta_s G_{A:B}^{\ominus} = -2.71 + 0.29 \cdot \Delta_s G_{A:H_2O}^{\ominus} + 0.74 \cdot \Delta_s G_{A:CHE}^{\ominus} + 0.12 \cdot \Delta_s G_{B:H_2O}^{\ominus} - 0.01 \cdot \Delta_s G_{B:CHE}^{\ominus}. \quad (\text{S.2})$$

Thus,  $\Delta_s G_{A:B}^{\ominus}$  depends mainly on the solvation free energy of A in CHE (0.74), less pronouncedly on the solvation free energy of A in H2O (0.29), and marginally on the solvation free energy of B in H2O (0.12), while it is essentially independent of the solvation free energy of B in CHE (-0.01). The deviations between experimental and calculated cross-solvation free energies for this H2O+CHE two-solvent model are shown in Fig. S.6c.

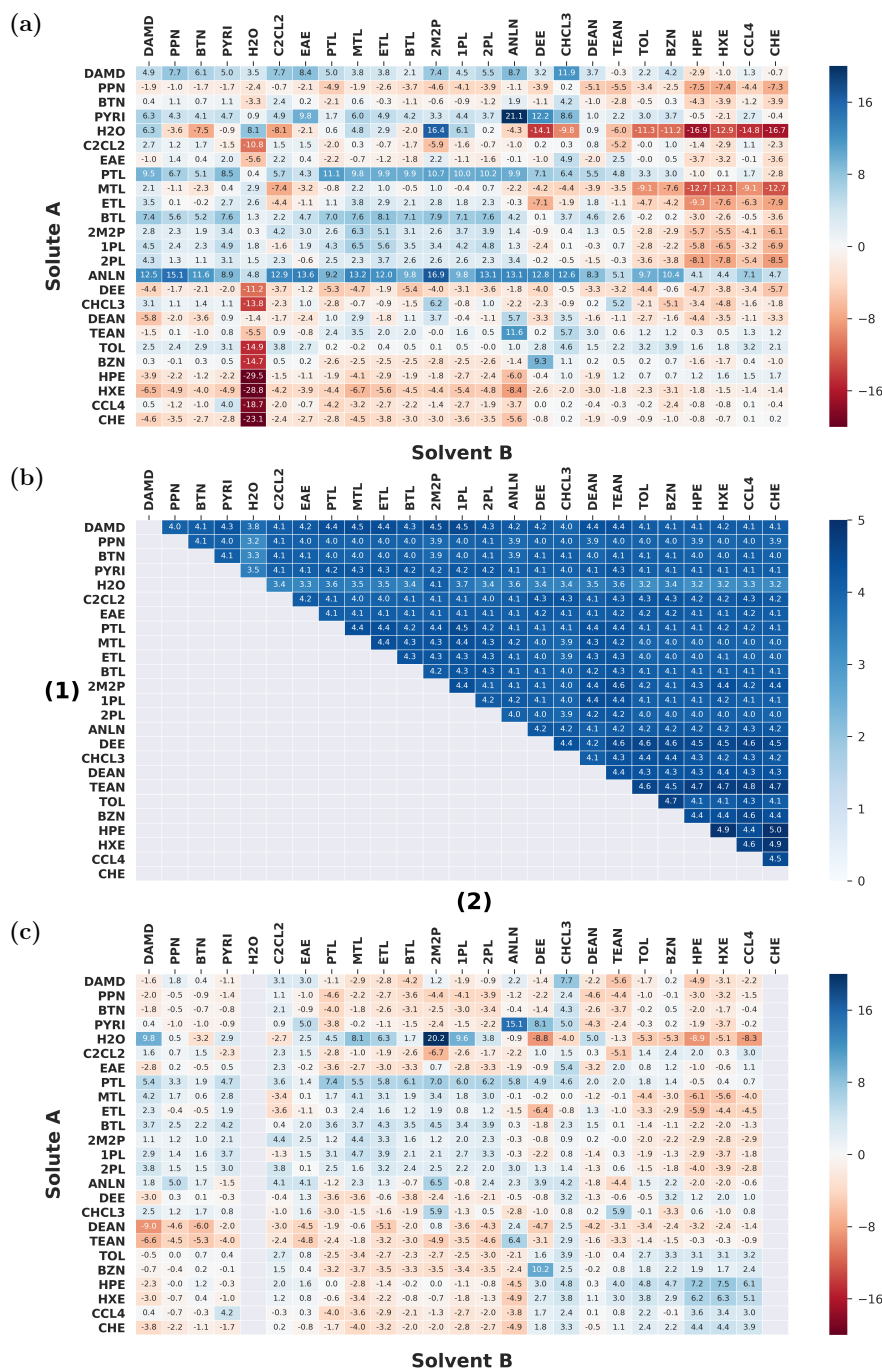

# References

- (1) D.L. Mobley, E. Dumont, J.D. Chodera and K.A. Dill, *J. Phys. Chem. B*, 2007, **111**, 2242-2254.
- (2) D.L. Mobley, C.I. Bayly, M.D. Cooper, M.R. Shirts and K.A. Dill, *J. Chem. Theory Comput.*, 2009, **5**, 350-358.
- (3) S. Shivakumar, Y. Deng and B. Roux, *J. Chem. Theory Comput.*, 2009, **5**, 919-930.
- (4) D. Shivakumar, J. Williams, Y. Wu, W. Damm, J. Shelley and W. Sherman, *J. Chem. Theory Comput.*, 2010, **6**, 1509-1519.
- (5) D. Shivakumar, E. Harder, W. Damm, R.A. Friesner and W. Sherman, *J. Chem. Theory Comput.*, 2012, **8**, 2553-2558.
- (6) P.S. Nerenberg, B. Jo, C. So, A. Tripathy and T. Head-Gordon, *J. Phys. Chem. B*, 2012, **116**, 4524-4534.
- (7) L. Huang and B. Roux, *J. Chem. Theory Comput.*, 2013, **9**, 3543-3556.
- (8) J.P.M. Jämbeck and A.P. Lyubartsev, *J. Phys. Chem. B*, 2014, **118**, 3793-3804.
- (9) M. Lundborg and E. Lindahl, *J. Phys. Chem. B*, 2015, **119**, 810-823.
- (10) J. Zhang, B. Tuguldur and D. van der Spoel, *J. Chem. Inf. Model.*, 2015, **55**, 1192-1201.
- (11) J. Zhang, B. Tuguldur and D. van der Spoel, *J. Chem. Inf. Model.*, 2016, **56**, 819-820.
- (12) H. Zhang, C. Yin, Y. Jiang and D. van der Spoel, *J. Chem. Inf. Model.*, 2018, **58**, 1037-1052.
- (13) C.L. Wennberg, T. Murtola, S. Páll, M.J. Abraham, B. Hess and E. Lindahl, *J. Chem. Theory Comput.*, 2015, **11**, 5737-5746.
- (14) N.M. Fischer, P.J. van Maaren, J.C. Ditz, A. Yildirim and D. van der Spoel, *J. Chem. Theory Comput.*, 2015, **11**, 2938-2944.
- (15) Z. Bashardanesh and D. van der Spoel, *J. Phys. Chem. B*, 2018, **122**, 8018-8027.
- (16) Y.M.H. Gonçalves, C. Senac, P.F.J. Fuchs, P.H. Hünenberger and B.A.C. Horta, *J. Chem. Theory Comput.*, 2019, **15**, 1806-1826.
- (17) S.W. Siu, K. Pluhackova, , *J. Chem. Theory Comput.*, 2012, **8**, 1459-1470.
- (18) M. Fyta and R.R. Netz, *J. Chem. Phys.*, 2012, **136**, 124103/1-124103/11.
- (19) J. Yoo and A. Aksimentiev, *J. Phys. Chem. Lett.*, 2012, **3**, 45-50.
- (20) J. Yoo and A. Aksimentiev, *J. Chem. Theory Comput.*, 2016, **12**, 430-443.
- (21) V. Satarifard, S. Kashfolgheta, A. Vila Verde and A. Grafmüller, *J. Chem. Theory Comput.*, 2017, **13**, 2112-2122.
- (22) S. Kashfolgheta and A. Vila Verde, *Phys. Chem. Chem. Phys.*, 2017, **19**, 20593-20607.
- (23) J. Huang, S. Rauscher, G. Nawrocki, T. Ran, M. Feig, B.L. de Groot, H. Grubmüller and A.D. MacKerell Jr, *Nat. Methods*, 2017, **14**, 71-73.
- (24) E. Boulanger, L. Huang, C. Rupakheti, A.D. MacKerell Jr. and B. Roux, *J. Chem. Theory Comput.*, 2018, **14**, 3121-3131.
- (25) A. Krämer, F.C. Pickard IV, J. Huang, R.M. Venable, A.C. Simmonett, D. Reith, K.N. Kirschner, R.W. Pastor and B.R. Brooks, *J. Chem. Theory Comput.*, 2019, **15**, 3854-3867.
- (26) C. Oostenbrink, A. Villa, A.E. Mark and W.F. van Gunsteren, *J. Comput. Chem.*, 2004, **25**, 1656-1676.
- (27) N. Schmid, A.P. Eichenberger, A. Choutko, S. Riniker, M. Winger, A.E. Mark and W.F. van Gunsteren, *Eur. Biophys. J.*, 2011, **40**, 843-856.
- (28) B.A.C. Horta, P.F.J. Fuchs, W.F. van Gunsteren and P.H. Hünenberger, *J. Chem. Theory Comput.*, 2011, **7**, 1016-1031.
- (29) B.A.C. Horta, Z. Lin, W. Huang, S. Riniker, W.F. van Gunsteren and P.H. Hünenberger, *J. Comput. Chem.*, 2012, **33**, 1907-1917.
- (30) P.F.J. Fuchs, H.S. Hansen, P.H. Hünenberger and B.A.C. Horta, *J. Chem. Theory Comput.*, 2012, **8**, 3943-3963.



- (31) M.M. Reif, P.H. Hünenberger and C. Oostenbrink, *J. Chem. Theory Comput.*, 2012, **8**, 3705-3723.
- (32) B.A.C. Horta, P.T. Merz, P. Fuchs, J. Dolenc, S. Riniker and P.H. Hünenberger, *J. Chem. Theory Comput.*, 2016, **12**, 3825-3850.
- (33) C.C. Bannan, K.H. Burley, M. Chiu, M.R. Shirts, M.K. Gilson and D.L. Mobley, *J. Comput. Aided Mol. Des.*, 2016, **30**, 927-944.
- (34) C.C. Bannan, G. Calabrò, D.Y. Kyu and D.L. Mobley, *J. Chem. Theory Comput.*, 2016, **12**, 4015-4024.
- (35) H. Zhang, Y. Jiang, Z. Cui and C. Yin, *J. Chem. Inf. Model.*, 2018, **58**, 1669-1681.
- (36) M. Stroet, B. Caron, K.M. Visscher, D.P. Geerke, A.K. Malde and A.E. Mark, *J. Chem. Theory Comput.*, 2018, **14**, 5834-5845.
- (37) D. Vassetti, M. Pagliai and P. Procacci, *J. Chem. Theory Comput.*, 2019, **15**, 1983-1995.
- (38) S. Liu, S. Cao, K. Hoang, K.L. Young, A.S. Paluch and D.L. Mobley, *J. Chem. Theory Comput.*, 2016, **12**, 1930-1941.
- (39) G.E. Long, P. Dhakal, B.N. Redeker and A.S. Paluch, *Mol. Simul.*, 2018, **45**, 322-335.
- (40) S.N. Roese, G.V. Margulis, A.J. Schmidt, C.B. Uzat, J.D. Heintz and A.S. Paluch, *Ind. Eng. Chem. Res.*, 2019, **58**, 22626-22632.
- (41) G.D.R. Matos, G. Calabrò and D.L. Mobley, *J. Chem. Theory Comput.*, 2019, **15**, 3066-3074.
- (42) A.J.M. Sweere and J.G.E.M. Fraaije, *J. Chem. Theory Comput.*, 2017, **13**, 1911-1923.
- (43) S. Kashefolgheta, M.P. Oliveira, S.R. Rieder, B.A.C. Horta, W.E. Acree Jr. and P.H. Hünenberger, *J. Chem. Theory Comput.*, 2020, **16**, 7556-7580.
- (44) A. Ben-Naim, *J. Chem. Educ.*, 1962, **39**, 242-245.
- (45) A. Ben-Naim, *J. Phys. Chem.*, 1978, **82**, 792-803.
- (46) A. Ben-Naim and Y. Marcus, *J. Chem. Phys.*, 1984, **81**, 2016-2027.
- (47) A.R. Katritzky, A.A. Oliferenko, P.V. Oliferenko, R. Petrukhin, D.B. Tatham, U. Maran, A. Lomaka and W.E. Acree Jr., *J. Chem. Inf. Comput. Sci.*, 2003, **43**, 1794-1805.
- (48) A.R. Katritzky, A.A. Oliferenko, P.V. Oliferenko, R. Petrukhin, D.B. Tatham, U. Maran, A. Lomaka and W.E. Acree Jr., *J. Chem. Inf. Comput. Sci.*, 2003, **43**, 1806-1814.
- (49) A.R. Katritzky, I. Tulp, D.C. Fara, A. Lauria, U. Maran and W.E. Jr. Acree, *J. Chem. Inf. Model.*, 2005, **45**, 913-923.
- (50) I. Tulp, D.A. Dobchev, A.R. Katritzky, W. Acree Jr. and U. Maran, *J. Chem. Inf. Model.*, 2010, **50**, 1275-1283.
- (51) A.V. Marenich, C.P. Kelly, J.D. Thompson, G.D. Hawkins, C.C. Chambers, D.J. Giesen, P. Winget, C.J. Cramer and D.G. Truhlar, *Minnesota solvation database - version 2012*, University of Minnesota, Minneapolis., <http://comp.chem.umn.edu/mnsol>, 2009.
- (52) G.D.R. Matos, D.Y. Kyu, H.H. Loeffler, J.D. Chodera, M.R. Shirts and D.L. Mobley, *J. Chem. Eng. Data*, 2017, **62**, 1559-1569.
- (53) W.E. Acree Jr., *Personal*, 2018, **Communication**, -.
- (54) P.H. Hünenberger, *CombiFF Data Collection in the ETHZ Research Collection (tar-file CrossSolvFE\_25x25, version 1.0 corresponds to the published article)*., [doi.org/10.3929/ethz-b-000445271](https://doi.org/10.3929/ethz-b-000445271), 2020.
- (55) K. Vanommeslaeghe, E. Hatcher, C. Acharya, S. Kundu, S. Zhong, J. Shim, E. Darian, O. Guvench, P. Lopes, I. Vorobyov and A.D. MCKerell Jr., *J. Comput. Chem.*, 2010, **31**, 671-690.
- (56) W. Yu, X. He, K. Vanommeslaeghe and A.D. MacKerell Jr., *J. Comput. Chem.*, 2012, **33**, 2451-2468.
- (57) W.L. Jorgensen, J.D. Madura and C.J. Swenson, *J. Am. Chem. Soc.*, 1984, **106**, 6638-6646.
- (58) W.L. Jorgensen, D.S. Maxwell and J. Tirado-Rives, *J. Am. Chem. Soc.*, 1996, **118**, 11225-11236.
- (59) W.L. Jorgensen and N.A. McDonald, *J. Mol. Struct. (Theochem)*, 1998, **424**, 145-155.
- (60) N.A. McDonald and W.L. Jorgensen, *J. Phys. Chem. B*, 1998, **102**, 8049-8059.

- (61) R.C. Rizzo and W.L. Jorgensen, *J. Am. Chem. Soc.*, 1999, **121**, 4827-4836.
- (62) M.L. Price, D. Ostrovsky and W.L. Jorgensen, *J. Comput. Chem.*, 2001, **22**, 1340-1352.
- (63) E.K. Watkins and W.L. Jorgensen, *J. Phys. Chem. A*, 2001, **105**, 4118-4125.
- (64) G.A. Kaminski, R.A. Friesner, J. Tirado-Rives and W.L. Jorgensen, *J. Phys. Chem. B*, 2001, **105**, 6474-6487.
- (65) W.D. Cornell, P. Cieplak, C.I. Bayly, I.R. Gould, K.M. Merz, D.M. Ferguson, D.C. Spellmeyer, T. Fox, J.W. Caldwell and P.A. Kollman, *J. Am. Chem. Soc.*, 1995, **117**, 5179-5197.
- (66) J.M. Wang, R.M. Wolf, J.W. Caldwell, P.A. Kollman and D.A. Case, *J. Comput. Chem.*, 2004, **25**, 1157-1174.
- (67) A.K. Malde, L. Zuo, M. Breeze, M. Stroet, D. Poger, P.C. Nair, C. Oostenbrink and A.E. Mark, *J. Chem. Theory Comput.*, 2011, **7**, 4026-4037.
- (68) L.S. Dodda, J.Z. Vilseck, J. Tirado-Rives and W.L. Jorgensen, *J. Phys. Chem. B*, 2017, **121**, 3864-3870.
- (69) J. Wang, *Development of the Second Generation of the General AMBER Force Field*, <https://www.researchgate.net/project/Development-of-the-Second-Generation-of-the-General-AMBER-Force-Field>, 2020.
- (70) J. Wang, W. Wang, P.A. Kollman and D.A. Case, *J. Mol. Graph. Model.*, 2006, **25**, 247-260.
- (71) D.A. Case, R.M. Betz, D.S. Cerutti, T.E. Cheatham III, T.A. Darden, R.E. Duke, T.J. Giese, H. Gohlke, A.W. Goetz, N. Homeyer, S. Izadi, P. Janowski, J. Kaus, A. Kovalenko, T.S. Lee, S. LeGrand, P. Li, C. Lin, T. Luchko, R. Luo, B. Madej, D. Mermelstein, K.M. Merz, G. Monard, H. Nguyen, H.T. Nguyen, I. Omelyan, A. Onufriev, D.R. Roe, A. Roitberg, C. Sagui, C.L. Simmerling, W.M. Botello-Smith, J. Swails, R.C. Walker, J. Wang, R.M. Wolf, X. Wu, L. Xiao and P.A. Kollman, *AMBER 2016, University of California, San Francisco.*, <https://ambermd.org/>, 2016.
- (72) D.L. Mobley, C.C. Bannan, A. Rizzi, C.I. Bayly, J.D. Chodera, V.T. Lim, N.M. Lim, K.A. Beauchamp, D.R. Slochowicz, M.R. Shirts, M.K. Gilson and P.K. Eastman, *J. Chem. Theory Comput.*, 2018, **14**, 6076-6092.
- (73) J. Träg and D. Zahn, *J. Mol. Model.*, 2019, **25**, 39/1-39/8.
- (74) S. Zhu, *J. Chem. Inf. Model.*, 2019, **59**, 4239-4247.
- (75) R. Galvelis, S. Doerr, J.M. Damas, M.J. Harvey and G. De Fabritiis, *J. Chem. Inf. Model.*, 2019, **59**, 3485-3493.
- (76) D.L. Mobley, C.C. Bannan, A. Rizzi, C.I. Bayly, J.D. Chodera, V.R. Lim, N.M. Lim, K.A. Beauchamp, M.R. Shirts, M.K. Gilson and P.K. Eastman, *bioRxiv*, 2018, **2018**, 286542-.
- (77) C. Zanette, C.C. Bannan, C.I. Bayly, J. Fass, M.K. Gilson, M.R. Shirts, J.D. Chodera and D.L. Mobley, *J. Chem. Theory Comput.*, 2019, **15**, 402-423.
- (78) *Open Force Field*, <https://openforcefield.org/>, 2020.
- (79) T. Darden, D. York and L. Pedersen, *J. Chem. Phys.*, 1993, **98**, 10089-10092.
- (80) U. Essmann, L. Perera, M.L. Berkowitz, T. Darden, H. Lee and L.G. Pedersen, *J. Chem. Phys.*, 1995, **103**, 8577-8593.
- (81) J.A. Barker and R.O. Watts, *Mol. Phys.*, 1973, **26**, 789-792.
- (82) I.G. Tironi, R. Sperb, P.E. Smith and W.F. van Gunsteren, *J. Chem. Phys.*, 1995, **102**, 5451-5459.
- (83) P.H. Hünenberger and W.F. van Gunsteren, *J. Chem. Phys.*, 1998, **108**, 6117-6134.
- (84) A. Kubincová, S. Riniker and P.H. Hünenberger, *Phys. Chem. Chem. Phys.*, 2020, **22**, 26419-26437.
- (85) U.C. Singh and P.A. Kollman, *J. Comput. Chem.*, 1984, **5**, 129-145.
- (86) B.H. Besler, K.M. Merz Jr. and P.A. Kollman, *J. Comput. Chem.*, 1990, **11**, 431-439.
- (87) A.D. Becke, *J. Chem. Phys.*, 1993, **98**, 5648-5652.
- (88) C. Lee, W. Yang and R.G. Parr, *Phys. Rev. B*, 1988, **37**, 785-789.
- (89) A.D. Becke, *Phys. Rev. A*, 1988, **38**, 3098-3100.
- (90) P.J. Stephens, F.J. Devlin, C.F. Chabalowski and M.J. Frisch, *J. Phys. Chem.*, 1994, **98**, 11623-11627.

- (91) W.J. Hehre, R. Ditchfield and J.A. Pople, *J. Chem. Phys.*, 1972, **56**, 2257-2261.
- (92) S. Miertuš, E. Scrocco and J. Tomasi, *Chem. Phys.*, 1981, **55**, 117-129.
- (93) C. Møller and M.S. Plesset, *Phys. Rev.*, 1934, **46**, 618-622.
- (94) J.W. Storer, D.J. Giesen, C.J. Cramer and D.G. Truhlar, *J. Computer-Aided Mol. Des.*, 1995, **9**, 87-110.
- (95) M. Udier-Blagović, P. Morales de Tirado, S.A. Pearlman and W.L. Jorgensen, *J. Comput. Chem.*, 2004, **25**, 1322-1332.
- (96) W.L. Jorgensen and J. Tirado-Rives, *Proc. Natl. Acad. Sci. USA*, 2005, **102**, 6665-6670.
- (97) R.S. Mulliken, *J. Chem. Phys.*, 1955, **23**, 1833-1840.
- (98) M.J.S. Dewar, E.G. Zoebisch, E.F. Healy and J.J.P. Stewart, *J. Am. Chem. Soc.*, 1985, **107**, 3902-3909.
- (99) C.I. Bayly, P. Cieplak, W.D. Cornell and P.A. Kollman, *J. Phys. Chem.*, 1993, **97**, 10269-10280.
- (100) D.R. Hartree, *Proc. Cambridge Philos. Soc.*, 1928, **24**, 89-110.
- (101) V. Fock, *Z. Phys.*, 1930, **61**, 126-148.
- (102) A. Jakalian, B.L. Bush, D.B. Jack and C.I. Bayly, *J. Comput. Chem.*, 2000, **21**, 132-146.
- (103) A. Jakalian, D.B. Jack and C.I. Bayly, *J. Comput. Chem.*, 2002, **23**, 1623-1641.
- (104) J.E. Lennard-Jones, *Physica*, 1937, **4**, 941-956.
- (105) M.P. Allen and D.J. Tildesley, *Computer simulation of liquids.*, Oxford University Press, New York, USA, 1987.
- (106) Z.-M. Chen, T. Çağın and W.A. Goddard III, *J. Comput. Chem.*, 1997, **18**, 1365-1370.
- (107) P.J. In't Veld, A.E. Ismail and G.S. Grest, *J. Chem. Phys.*, 2007, **127**, 144711/1-144711/8.
- (108) R.E. Isele-Holder, W. Mitchell and A.E. Ismail, *J. Chem. Phys.*, 2012, **137**, 174107/1-174107/13.
- (109) R.E. Isele-Holder, W. Mitchell, J.R. Hammond, A. Kohlmeier and A.E. Ismail, *J. Chem. Theory Comput.*, 2013, **9**, 5412-5420.
- (110) L.C. Wennberg, T. Murtola, B. Hess and E. Lindahl, *J. Chem. Theory Comput.*, 2013, **9**, 3527-3537.
- (111) H.A. Lorentz, *Ann. Phys.*, 1881, **248**, 127-136.
- (112) D. Berthelot, *Comptes rendus de l'académie des sciences Paris*, 1889, **126**, 1703-1706.
- (113) R.J. Good and C.J. Hope, *J. Chem. Phys.*, 1970, **53**, 540-543.
- (114) R.J. Good and C.J. Hope, *J. Chem. Phys.*, 1971, **55**, 111-116.
- (115) I.G. Tironi and W.F. van Gunsteren, *Mol. Phys.*, 1994, **83**, 381-403.
- (116) H.J.C. Berendsen, J.P.M. Postma, W.F. van Gunsteren and J. Hermans, Interaction models for water in relation to protein hydration., In: *Intermolecular Forces.*, Pullman, B., Ed., Reidel, Dordrecht, The Netherlands, 1981, pp 381-403.
- (117) W.L. Jorgensen, J. Chandrasekhar, J.D. Madura, R.W. Impey and M.L. Klein, *J. Chem. Phys.*, 1983, **79**, 926-935.
- (118) W.L. Jorgensen, *J. Am. Chem. Soc.*, 1981, **103**, 335-340.
- (119) G. Duffy Kaminski, Matsui E.M., Jorgensen T., , *J. Phys. Chem.*, 1994, **1994**, 98-.
- (120) E. Duffy and W.L. Jorgensen, *J. Am. Chem. Soc.*, 2000, **122**, 2878-2888.
- (121) L.S. Dodda, I. Cabeza de Vaca, J. Tirado-Rives and W.L. Jorgensen, *Nucleic Acids Res.*, 2017, **45**, W331-W336.
- (122) A.D. MacKerell Jr., D. Bashford, M. Bellott, R.L. Dunbrack, J.D. Evanseck, M.J. Field, S. Fischer, J. Gao, H. Guo, S. Ha, D. Joseph-McCarthy, L. Kuchnir, K. Kuczera, F.T.K. Lau, C. Mattos, S. Michnick, T. Ngo, D.T. Nguyen, B. Prodhom, W.E. Reiher, B. Roux, M. Schlenkrich, J.C. Smith, R. Stote, J. Straub, M. Watanabe, J. Wiorkiewicz-Kuczera, D. Yin and M. Karplus, *J. Phys. Chem. B*, 1998, **102**, 3586-3616.

- (123) I.G. Tironi, P. Fontana and W.F. van Gunsteren, *Mol. Sim.*, 1996, **18**, 1-11.
- (124) M.P. Oliveira, M. Andrey, S.R. Rieder, L. Kern, D.F. Hahn, S. Riniker, B.A.C. Horta and P.H. Hünenberger, *J. Chem. Theory Comput.*, 2020, **16**, 7525-7555.
- (125) C. Caleman, P.J. van Maaren, M. Hong, J.S. Hub, L.T. Costa and D. van der Spoel, *J. Chem. Theory Comput.*, 2012, **8**, 61-74.
- (126) S. Jo, T. Kim, V. Iyer and W. Im, *J. Comput. Chem.*, 2008, **29**, 1859-1865.
- (127) B.R. Brooks, C.L. Brooks III, L. Nilsson, R.J. Petrella, B. Roux, Y. Won, G. Archontis, C. Bartels, S. Boresch, A. Caffisch, L. Caves, Q. Cui, A.R. Dinner, M. Feig, S. Fischer, J. Gao, M. Hodoscek, W. Im, K. Kuczera, T. Lazaridis, J. Ma, V. Ovchinnikov, E. Paci, R.W. Pastor, C.B. Post, J.Z. Pu, M. Schaefer, B. Tidor, R.M. Venable, H.L. Woodcock, X. Wu, W. Yang, D.M. York and M. Karplus, *J. Comput. Chem.*, 2009, **30**, 1545-1614.
- (128) J. Lee, X. Cheng, J.M. Swails, M.S. Yeom, P.K. Eastman, J.A. Lemkul, S. Wei, J. Buckner, J.C. Jeong, Y. Qi, S. Jo, J.S. Pande, D.A. Case, C.L. Brooks III, A.D. MacKerell Jr., J.B. Klauda and W. Im, *J. Chem. Theory Comput.*, 2016, **12**, 405-413.
- (129) S. Kim, J. Lee, S. Jo, C.L. Brooks III, H.S. Lee and W. Im, *J. Comput. Chem.*, 2017, **38**, 1879-1886.
- (130) P.H. Hünenberger, *Computer Simulation of Molecular Systems / GROMOS*, [http://www.csms.ethz.ch/files\\_and\\_links/GROMOS.html](http://www.csms.ethz.ch/files_and_links/GROMOS.html), 1.6.2016.
- (131) A.E. Mark, *Automated Topology Builder version 3.0 (ATB3.0)*, <https://atb.uq.edu.au>, 2018.
- (132) *TPPMKTOP*, <http://erg.biophys.msu.ru/erg/tpp/>, 2018.
- (133) H.J.C. Berendsen, D. van der Spoel and R. van Drunen, *Comput. Phys. Commun.*, 1995, **91**, 43-56.
- (134) D. van der Spoel, E. Lindahl, B. Hess, G. Groenhof, A.E. Mark and H.J.C. Berendsen, *J. Comput. Chem.*, 2005, **26**, 1701-1718.
- (135) M.J. Frisch, G.W. Trucks, H.B. Schlegel, G.E. Scuseria, M.A. Robb, J.R. Cheeseman, J.A. Montgomery Jr., T. Vreven, K.N. Kudin, J.C. Burant, J.M. Millam, S.S. Iyengar, J. Tomasi, V. Barone, B. Mennucci, M. Cossi, G. Scalmani, N. Rega, G.A. Petersson, H. Nakatsuji, M. Hada, M. Ehara, K. Toyota, R. Fukuda, J. Hasegawa, M. Ishida, T. Nakajima, Y. Honda, O. Kitao, H. Nakai, M. Klene, X. Li, J.E. Knox, H.P. Hratchian, J.B. Cross, V. Bakken, C. Adamo, J. Jaramillo, R. Gomperts, R.E. Stratmann, O. Yazyev, A.J. Austin, R. Cammi, C. Pomelli, J.W. Ochterski, P.Y. Ayala, K. Morokuma, G.A. Voth, P. Salvador, J.J. Dannenberg, V.G. Zakrzewski, S. Dapprich, A.D. Daniels, M.C. Strain, O. Farkas, D.K. Malick, A.D. Rabuck, K. Raghavachari, J.B. Foresman, J.V. Ortiz, Q. Cui, A.G. Baboul, S. Clifford, J. Cioslowski, B.B. Stefanov, G. Liu, A. Liashenko, P. Piskorz, I. Komaromi, R.L. Martin, D.J. Fox, T. Keith, M.A. Al-laham, C.Y. Peng, A. Nanayakkara, M. Challacombe, P.M.W. Gill, B. Johnson, W. Chen, M.W. Wong, C. Gonzalez and J.A. Pople, *Gaussian 03, Revision D.01*, Gaussian, Inc., Wallingford CT, 2004.
- (136) G. Landrum, *The RDKit software.*, [www.rdkit.org](http://www.rdkit.org), 1.12.2020.
- (137) H.J.C. Berendsen, J.P.M. Postma, W.F. van Gunsteren, A. di Nola and J.R. Haak, *J. Chem. Phys.*, 1984, **81**, 3684-3690.
- (138) R.W. Hockney and J.W. Eastwood, *Computer simulation using particles.*, McGraw-Hill, New York, USA, 1981.
- (139) W.F. van Gunsteren and H.J.C. Berendsen, *Mol. Simul.*, 1988, **1**, 173-185.
- (140) L. Martínez, R. Andrade, E.G. Birgin and J.M. Martínez, *J. Comput. Chem.*, 2009, **30**, 2157-2164.
- (141) W.F. van Gunsteren, *The GROMOS software for biomolecular simulation.*, <http://www.gromos.net>, 05/05/2011.
- (142) A.P. Eichenberger, J.R. Allison, J. Dolenc, D.P. Geerke, B.A.C. Horta, K. Meier, C. Oostenbrink, N. Schmid, D. Steiner, D. Wang and W.F. van Gunsteren, *J. Chem. Theory Comput.*, 2011, **7**, 3379-3390.
- (143) A.-P. E. Kunz, J.R. Allison, D.P. Geerke, B.A.C. Horta, P.H. Hünenberger, S. Riniker, N. Schmid and W.F. van Gunsteren, *J. Comput. Chem.*, 2012, **33**, 340-353.
- (144) N. Schmid, C.D. Christ, M. Christen, A.P. Eichenberger and W.F. van Gunsteren, *Comput. Phys. Commun.*, 2012, **183**, 890-903.
- (145) J.G. Kirkwood, *J. Chem. Phys.*, 1935, **3**, 300-313.
- (146) M. Jorge, N.M. Garrido, A.J. Queimada, I.G. Economou and E.A. Macedo, *J. Chem. Theory Comput.*, 2010, **6**, 1018-1027.
- (147) S. Bruckner and S. Boresch, *J. Comput. Chem.*, 2011, **32**, 1303-1319.

- (148) S. Bruckner and S. Boresch, *J. Comput. Chem.*, 2011, **32**, 1320-1333.
- (149) J. Kepler, *Nova stereometria doliorum vinariorum. Edition 1.*, Johann Planck, Linz, Austria, 1615.
- (150) T.C. Beutler, A.E. Mark, R. van Schaik, P.R. Gerber and W.F. van Gunsteren, *Chem. Phys. Lett.*, 1994, **222**, 529-539.
- (151) H.J.C. Berendsen, W.F. van Gunsteren, H.R.J. Zwinderman and R.G. Geurtsen, *Ann. New York Acad. Sci.*, 1986, **482**, 269-285.
- (152) J.-P. Ryckaert, G. Ciccotti and H.J.C. Berendsen, *J. Comput. Phys.*, 1977, **23**, 327-341.
- (153) C.H. Bennett, *J. Comput. Phys.*, 1976, **22**, 245-268.
- (154) B. Hess, H. Bekker, H.J.C. Berendsen and J.G.E.M. Fraaije, *J. Comput. Chem.*, 1997, **18**, 1463-1472.
- (155) S. Miyamoto and P.A. Kollman, *J. Comput. Chem.*, 1992, **13**, 952-962.
- (156) C. Oostenbrink, D. Juchli and W.F. van Gunsteren, *Chem. Phys. Chem.*, 2005, **6**, 1800-1804.
- (157) M. Pechlaner, M. Reif and C. Oostenbrink, *Mol. Phys.*, 2017, **115**, 1144-1154.
- (158) P.E. Smith and W.F. van Gunsteren, *J. Phys. Chem.*, 1994, **98**, 13735-13740.
- (159) A.E. Mark and W.F. van Gunsteren, *J. Mol. Biol.*, 1994, **240**, 167-176.
- (160) M.P. Oliveira, S. Kashfolgheta, Y.M.H. Gonçalves, B.A.C. Horta and P.H. Hünenberger, *J. Chem. Theory Comput.*, 2020, **X**, XXX-XXX.
- (161) S.M. Kantonen, H.S. Muddana, M. Schauerperl, N.M. Henriksen and L. Wang, *J. Chem. Theory Comput.*, 2020, **16**, 1115-1127.
